# Supplementary material for: Organocatalytic formal [4 + 2] cycloaddition of o-quinone-methyl derivatives and 2-isocyanatomalonate diesters for the construction of chroman derivatives with adjacent quaternary chiral centers
Source: Royal Society of Chemistry journal article supplement (doi:10.1039/d4qo00141a), 2024-01-01
Supplement: d4qo00141a1.pdf [file d4qo00141a1.pdf]

## SUPPORTING INFORMATION

---

### Supporting Information

# **Organocatalytic formal [4+2] cycloaddition of o-quinone-methyl derivatives and 2-isocyanatomalonate diesters for the construction of chroman derivatives with adjacent quaternary chiral centers**

Tong Xiong<sup>a</sup>, Yi-Zhao Xu<sup>a</sup>, Yao Wang<sup>a</sup>, You-Cai Xiao<sup>\*a</sup>, Fen-Er Chen<sup>\*a,b</sup>

<sup>a</sup> Key Laboratory of Drug-Targeting and Drug Delivery System of the Ministry of Education and Sichuan Research Center for Drug Precision Industrial Technology, West China School of Pharmacy, Sichuan University, Chengdu 610041, China

<sup>b</sup> Engineering Center of Catalysis and Synthesis for Chiral Molecules, Department of Chemistry, Fudan University, Shanghai 200433, China

E-mail: xiaoliguo1987@scu.edu.cn; rfchen@fudan.edu.cn

## SUPPORTING INFORMATION

---

### Table of Contents

|                                  |    |
|----------------------------------|----|
| 1. General Information .....     | 3  |
| 2. Experimental Procedures ..... | 3  |
| 3. Reference.....                | 12 |
| 4. Spectral Data .....           | 13 |
| 5. HPLC Spectra .....            | 37 |
| 6. Crystallographic Data .....   | 60 |

## 1. General Information

All reactions and manipulations which are sensitive to moisture or air were performed under inert atmosphere of argon. Oil bath was served as the heat source. All commercially available reagents were used without further purification. Chromatography was conducted by using 300-400 mesh silica gel. NMR spectra were recorded on a Bruker Ascend spectrometer at 400 MHz ( $^1\text{H}$  NMR) or 101 MHz or 151 MHz ( $^{13}\text{C}$  NMR) and 376 MHz ( $^{19}\text{F}$  NMR). NMR spectra were recorded in deuterated DMSO- $d_6$  as a solvent with residual DMSO ( $\delta$  2.50 ppm. for  $^1\text{H}$  NMR and  $\delta$  39.5 ppm. for  $^{13}\text{C}$  NMR) taken as the inert standard and were reported in ppm. Abbreviations for signal coupling are as follows: s = singlet, d = doublet, t = triplet, q = quartet, m = multiplet, dd = double doublet, dq = double quartet, and td = double triplet. Coupling constants were taken from the spectra directly and are uncorrected. Melting points (m.p.) were recorded on an SRS-optic melting point apparatus. Optical rotations were determined using a Rudolph Research Analytical Autopol VI automatic polarimeter. High-resolution mass spectra (HRMS) were recorded on Bruker micrOTOF-Q III, by the ESI method. HPLC analyses were performed using Agilent Technologies 1260 Infinity II with DAICEL Chiralcel AD-H column and DAICEL Chiralcel OD-H column. Single-Crystal X-Ray diffraction was recorded at Bruker APEX-II CCD diffractometer.

## 2. Experimental Procedures

### 2.1 Synthesis of *o*-quinone methides (*o*-QMs)<sup>1</sup>

**1a-1g** were synthesized according to Jurd's procedure.

### 2.2 General synthesis of vinyl *o*-quinone methides.<sup>2</sup> (**4a-4n**)

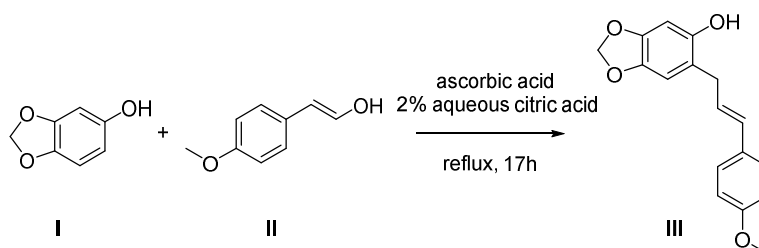

A suspension of sesame phenol **I** (3.00 g, 21.7 mmol) and 4-Methoxybenzyl alcohol **II** (3.00 g, 21.7 mmol) in 2% aqueous citric acid (55 mL) containing ascorbic acid (1.09 g, 6.08 mmol) was refluxed for 17 hours, then cooling to room temperature, The reaction solution was extracted three times with ethyl acetate (30 mL x3). The combined organic extracts were dried over  $\text{NaSO}_4$ , filtered, and concentrated in vacuo. then the oil product was purified by silica gel column chromatography to give **III** which was used in the next step.

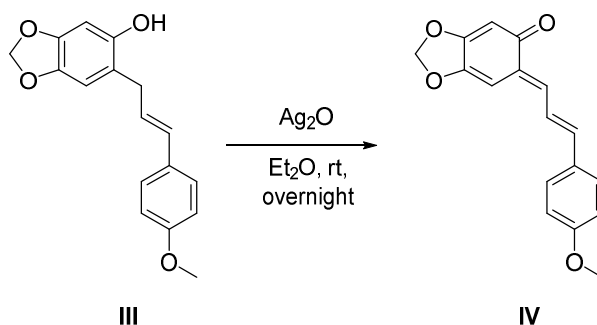



## SUPPORTING INFORMATION

in 1.0 mL dry DCM under an argon atmosphere at room temperature; the reactions were detected by TLC, LCMS and  $^1\text{H}$  NMR. "np" = "no product".

### 2.5 General procedure for the formal [4+2] annulation of o-QMs and styryl-substituted o-QMs.

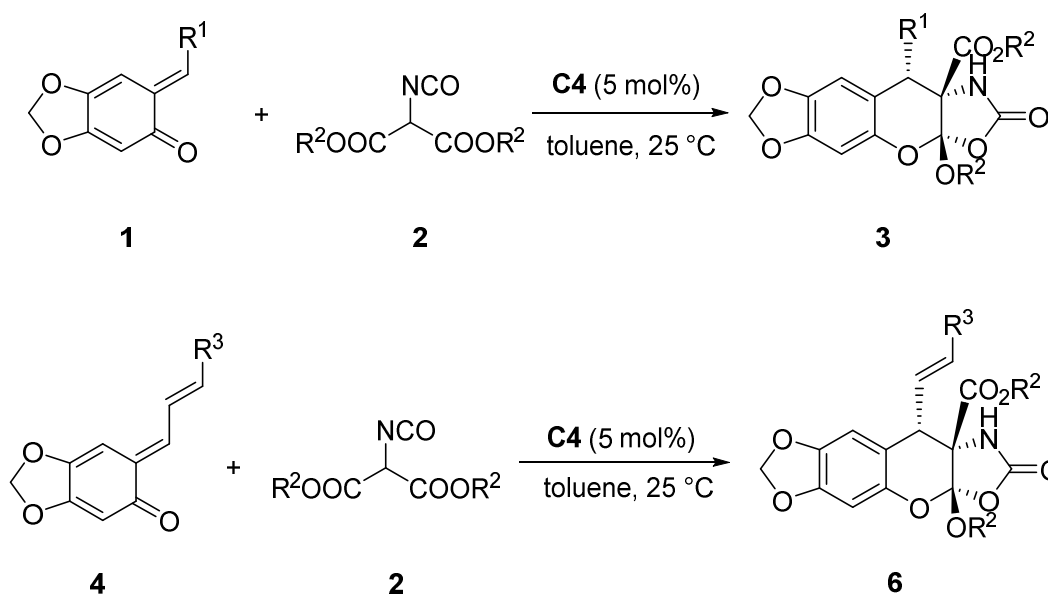

A mixture of **1** or **4** (0.1 mmol) and **C4** (0.005 mmol) in dry toluene (1.0 mL) was stirred for 5 min at 25 °C in a Schlenk tube under an atmosphere of argon. Then **2** (30 mg, 0.15 mmol) was added to the above mixtures via microsyringe. The mixture was stirred at 25 °C until the starting material was completely consumed (determined by thin layer chromatography monitoring). Then, the reaction was quenched with methanol, and the solvent was removed under reduced pressure and the residue was purified by flash chromatography on silica gel (PE/EA 8:1) to afford **3** or **6**.

#### Ethyl (3a*R*,10*S*,10a*R*)-3a-ethoxy-10-(4-methoxyphenyl)-2-oxo-1,2-dihydro-10*H*-[1,3]dioxolo[4',5':6,7]chromeno[3,2-*d*]oxazole-10a(3a*H*)-carboxylate (**3a**)

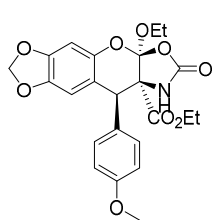

Prepared by the general procedure, and **3a** was isolated as a white solid, > 20:1 d.r., 93.7% ee. (39.8 mg, 87% yield), eluent (petroleum ether/ethyl acetate = 8:1).  $^1\text{H}$  NMR (400 MHz, DMSO-*d*<sub>6</sub>)  $\delta$  8.72 (s, 1H), 7.37 – 7.29 (m, 1H), 7.19 (dd,  $J$  = 7.7, 1.7 Hz, 1H), 7.06 (dd,  $J$  = 8.4, 1.2 Hz, 1H), 6.97 – 6.90 (m, 1H), 6.87 (s, 1H), 6.04 (s, 1H), 5.98 (s, 2H), 5.26 (s, 1H), 4.10 – 4.00 (m, 3H), 3.99 – 3.87 (m, 1H), 3.76 (s, 3H), 1.17 (t,  $J$  = 7.1 Hz, 3H), 1.06 (t,  $J$  = 7.1 Hz, 3H).  $^{13}\text{C}$  NMR (151 MHz, DMSO-*d*<sub>6</sub>) 167.3, 157.1, 154.4, 146.7, 144.4, 143.9, 129.1, 129.0, 123.0, 121.4, 120.4, 118.4, 111.0, 106.7, 101.5, 100.9, 73.8, 61.7, 60.2, 55.6, 38.6, 14.8, 13.7. HRMS

(ESI)  $m/z$  calcd for  $\text{C}_{23}\text{H}_{23}\text{NO}_9$  [ $\text{M} + \text{Na}$ ] $^+$ : 480.1265, found: 480.1264.  $[\alpha]_{\text{D}}^{25}$  = -33.26 ( $c$  = 0.20,  $\text{CDCl}_3$ ). HPLC (CHIRALCEL AD-H), *n*-hexane/2-propanol = 80/20, flow rate 0.8 mL/min, detection at 254 nm,  $t_{\text{R}}$  = 16.3 min (major), 21.8 min (minor), mp = 182.8–183.9 °C.

#### Methyl (3a*R*,10*S*,10a*R*)-3a-methoxy-10-(4-methoxyphenyl)-2-oxo-1,2-dihydro-10*H*-[1,3]dioxolo[4',5':6,7]chromeno[3,2-*d*]oxazole-10a(3a*H*)-carboxylate (**3b**).

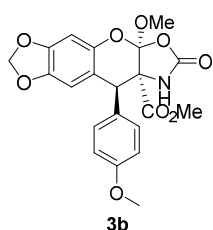

Prepared by the general procedure, and **3b** was isolated as a white solid, > 20:1 d.r., 96% ee. (35.6 mg, 83% yield), eluent (petroleum ether/ethyl acetate = 8:1).  $^1\text{H}$  NMR (400 MHz, DMSO-*d*<sub>6</sub>)  $\delta$  8.77 (s, 1H), 7.23 (d,  $J$  = 8.8 Hz, 2H), 6.95 (d,  $J$  = 8.8 Hz, 2H), 6.88 (s, 1H), 6.27 (s, 1H), 5.99 (s, 2H), 4.71 (s, 1H), 3.77 (s, 3H), 3.64 (s, 3H), 3.62 (s, 3H).  $^{13}\text{C}$  NMR (151 MHz, DMSO-*d*<sub>6</sub>) 167.45, 158.86, 153.86, 146.82, 144.27, 143.87, 131.73, 125.40, 120.76, 117.91, 114.02, 107.05, 101.58, 101.00, 74.63, 55.03, 52.92, 51.59, 46.31. HRMS (ESI)  $m/z$  calcd for  $\text{C}_{21}\text{H}_{19}\text{NO}_9$  [ $\text{M} + \text{Na}$ ] $^+$ : 452.0952, found: 452.0960.  $[\alpha]_{\text{D}}^{25}$  = -58.33 ( $c$  = 0.15,  $\text{CDCl}_3$ ). HPLC (CHIRALCEL AD-H), *n*-hexane/2-propanol = 80/20, flow rate 0.8 mL/min, detection at 254 nm,  $t_{\text{R}}$  = 15.6 min

(major), 17.3 min (minor), mp = 162.8–165.4 °C.

## SUPPORTING INFORMATION

### Benzyl (3aR,10S,10aR)-3a-(benzyloxy)-10-(4-methoxyphenyl)-2-oxo-1,2-dihydro-10H-[1,3]dioxolo[4',5':6,7]chromeno[3,2-d]oxazole-10a(3aH)-carboxylate (3c).

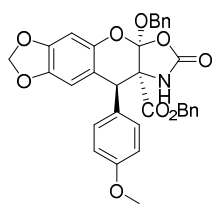

Prepared by the general procedure, and **3c** was isolated as a white solid, > 20:1 d.r., 89% ee. (44.1 mg, 76% yield), eluent (petroleum ether/ethyl acetate = 8:1). **<sup>1</sup>H NMR** (400 MHz, DMSO-*d*<sub>6</sub>) δ 8.90 (s, 1H), 7.39 – 7.18 (m, 10H), 7.13 (d, 2H), 6.92 (s, 1H), 6.90 (s, 2H), 6.27 (s, 1H), 6.00 (s, 2H), 5.13 (d, *J* = 12.1 Hz, 1H), 5.01 (s, 2H), 4.98 (d, *J* = 12.2 Hz, 1H), 4.76 (s, 1H), 3.78 (s, 3H). **<sup>13</sup>C NMR** (151 MHz, DMSO-*d*<sub>6</sub>) 166.89, 158.87, 153.83, 146.83, 144.27, 143.92, 136.44, 134.78, 131.72, 128.32, 128.24, 128.09, 127.90, 127.79, 127.19, 120.82, 117.84, 114.02, 107.10, 101.59, 101.01, 74.76, 67.48, 65.83, 55.05, 46.42. **HRMS (ESI)** *m/z* calcd for C<sub>33</sub>H<sub>27</sub>NO<sub>9</sub> [M + Na]<sup>+</sup>: 604.1574, found: 604.1580. [α]<sub>D</sub><sup>25</sup> = -23.33 (c = 0.15, CDCl<sub>3</sub>). **HPLC** (CHIRALCEL OD-H), n-hexane/2-propanol = 75/25 flow rate 0.8 mL/min, detection at 254 nm, t<sub>R</sub> = 17.761 min (major), 10.518 min (minor), mp = 128.4–132.6 °C.

### Ethyl (3aR,10S,10aR)-3a-ethoxy-10-(2-methoxyphenyl)-2-oxo-1,2-dihydro-10H-[1,3]dioxolo[4',5':6,7]chromeno[3,2-d]oxazole-10a(3aH)-carboxylate (3d).

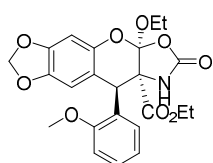

Prepared by the general procedure, and **3d** was isolated as a white solid, > 20:1 d.r., 98% ee. (35.7 mg, 78% yield), eluent (petroleum ether/ethyl acetate = 8:1). **<sup>1</sup>H NMR** (400 MHz, DMSO-*d*<sub>6</sub>) δ 8.72 (s, 1H), 7.36 – 7.31 (m, 1H), 7.20 – 7.16 (m, 1H), 7.09 – 7.04 (m, 1H), 6.97 – 6.91 (m, 1H), 6.87 (s, 1H), 6.04 (s, 1H), 5.98 (s, 2H), 5.26 (s, 1H), 4.12 – 4.02 (m, 3H), 3.99 – 3.88 (m, 1H), 3.76 (s, 3H), 1.17 (t, *J* = 7.1 Hz, 3H), 1.06 (t, *J* = 7.1 Hz, 3H). **<sup>13</sup>C NMR** (151 MHz, DMSO-*d*<sub>6</sub>) 167.3, 157.1, 154.5, 146.7, 144.4, 143.9, 129.1, 129.0, 123.0, 121.4, 120.4, 118.4, 111.0, 106.7, 101.5, 100.9, 73.7, 61.8, 60.2, 55.6, 38.6, 14.8, 13.7. **HRMS (ESI)** *m/z* calcd for C<sub>23</sub>H<sub>23</sub>NO<sub>9</sub> [M + Na]<sup>+</sup>: 480.1265, found: 480.1263. [α]<sub>D</sub><sup>25</sup> = -39.33 (c = 0.15, CDCl<sub>3</sub>). **HPLC** (CHIRALCEL AD-H), n-hexane/2-propanol = 80/20, flow rate 0.8 mL/min, detection at 254 nm, t<sub>R</sub> = 8.3 min (major), 23.8 min (minor), mp = 166.8–167.3 °C.

### ethyl (3aR,10S,10aR)-10-(2,4-dimethoxyphenyl)-3a-ethoxy-2-oxo-1,2-dihydro-10H-[1,3]dioxolo[4',5':6,7]chromeno[3,2-d]oxazole-10a(3aH)-carboxylate (3e)

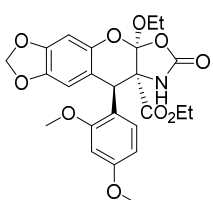

Prepared by the general procedure, and **3e** was isolated as a white solid, > 20:1 d.r., 97 % ee. (36.5 mg, 75% yield), eluent (petroleum ether/ethyl acetate = 8:1). **<sup>1</sup>H NMR** (400 MHz, DMSO-*d*<sub>6</sub>) δ 8.71 (s, 1H), 7.11 (d, *J* = 8.5 Hz, 1H), 6.85 (s, 1H), 6.60 (d, *J* = 2.5 Hz, 1H), 6.51 (dd, *J* = 8.5, 2.5 Hz, 1H), 6.05 (s, 1H), 5.98 (s, 2H), 5.16 (s, 1H), 4.10 – 4.01 (m, 3H), 3.15 – 3.05 (m, 1H), 3.78 (s, 3H), 3.75 (s, 3H), 1.17 (t, *J* = 7.2 Hz, 3H), 1.09 (t, *J* = 7.2 Hz, 3H). **<sup>13</sup>C NMR** (151 MHz, DMSO-*d*<sub>6</sub>) 167.3, 156.0, 158.3, 154.4, 146.6, 144.4, 143.9, 123.0, 121.7, 118.40, 114.84, 106.72, 104.84, 101.48, 100.88, 98.41, 74.04, 61.69, 60.17, 55.63, 55.15, 38.1, 14.8, 13.7. **HRMS (ESI)** *m/z* calcd for C<sub>24</sub>H<sub>25</sub>NO<sub>10</sub> [M + Na]<sup>+</sup>: 510.1371, found: 510.1373. [α]<sub>D</sub><sup>25</sup> = -46.30 (c = 0.15, CDCl<sub>3</sub>). **HPLC** (CHIRALCEL AD-H), n-hexane/2-propanol = 80/20, flow rate 0.8 mL/min, detection at 230 nm, t<sub>R</sub> = 22.3 min (major), 53.4 min (minor), mp = 181.3–184.9 °C.

### ethyl (3aR,10R,10aR)-3a-ethoxy-2-oxo-10-(2,3,4-trimethoxyphenyl)-1,2-dihydro-10H-[1,3]dioxolo[4',5':6,7]chromeno[3,2-d]oxazole-10a(3aH)-carboxylate (3f)

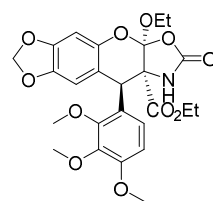

Prepared by the general procedure, and **3f** was isolated as a white solid, > 20:1 d.r., 96 % ee. (41.9mg, 81% yield), eluent (petroleum ether/ethyl acetate = 8:1). **<sup>1</sup>H NMR** (400 MHz, DMSO-*d*<sub>6</sub>) δ 8.78 (s, 1H), 7.00 (s, 1H), 6.86 (s, 1H), 6.79 (d, *J* = 3.2 Hz, 1H), 6.01 (s, 1H), 5.98 (s, 2H), 5.13 (s, 1H), 4.16 – 4.03 (m, 3H), 4.02 – 3.87 (m, 1H), 3.82(s, 3H), 3.75 (s, 3H), 3.71 (s,3H), 1.19 (t, *J* = 7.1 Hz, 3H), 1.10 (t, *J* = 7.1 Hz, 3H). **<sup>13</sup>C NMR** (151 MHz, DMSO-*d*<sub>6</sub>) 167.1, 154.4, 153.0, 152.1, 146.6, 144.2, 143.9, 141.6, 123.7, 121.9, 120.3, 118.5, 107.8, 106.6, 101.5, 100.9, 74.2, 61.8, 61.0, 60.3, 60.2, 55.7, 38.7, 14.8, 13.7. **HRMS (ESI)** *m/z* calcd for C<sub>25</sub>H<sub>27</sub>NO<sub>11</sub> [M + Na]<sup>+</sup>: 540.1476, found: 540.1479. [α]<sub>D</sub><sup>25</sup> = -42.56 (c = 0.15, CDCl<sub>3</sub>). **HPLC** (CHIRALCEL AD-H), n-hexane/2-propanol = 80/20, flow rate 0.8 mL/min, detection at 230 nm, t<sub>R</sub> = 16.5 min (major), 35.5 min (minor), mp = 191.2–192.6 °C.

## SUPPORTING INFORMATION

### ethyl(3*R*,10*S*,10*aR*)-3*a*-ethoxy-10-(4-ethoxyphenyl)-2-oxo-1,2-dihydro-10*H*-[1,3]dioxolo[4',5':6,7]chromeno[3,2-*d*]oxazole-10*a*(3*aH*)-carboxylate(3*g*)

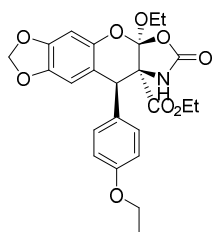

Prepared by the general procedure, and **3g** was isolated as a white solid, > 20:1 d.r., 91 % ee. (42.8mg, 91% yield), eluent (petroleum ether/ethyl acetate = 8:1). **<sup>1</sup>H NMR** (400 MHz, DMSO-*d*6)  $\delta$  8.72 (s, 1H), 7.23 (d, *J* = 8.7 Hz, 2H), 6.92 (d, *J* = 8.7 Hz, 2H), 6.86 (s, 1H), 6.23 (s, 1H), 5.99 (s, 2H), 4.70 (s, 1H), 4.15 – 4.06 (m, 3H), 4.06 – 3.99 (q, *J* = 7.0 Hz, 2H), 3.94 (dq, *J* = 9.6, 7.1 Hz, 1H), 1.33 (t, *J* = 7.0 Hz, 3H), 1.17 (dt, *J* = 9.0, 7.1 Hz, 6H). **<sup>13</sup>C NMR** (151 MHz, DMSO-*d*6) 166.9, 158.2, 154.1, 146.7, 144.4, 143.8, 131.8, 125.2, 120.9, 117.9, 114.4, 107.0, 101.5, 101.0, 74.6, 63.0, 61.8, 60.1, 46.1, 14.8, 14.6, 13.8. **HRMS (ESI)** *m/z* calcd for C<sub>24</sub>H<sub>24</sub>NO<sub>9</sub> [M + Na]<sup>+</sup>: 494.1422, found: 494.1428.  $[\alpha]_D^{25}$  = -35.63 (c = 0.32, CDCl<sub>3</sub>). **HPLC** (CHIRALCELAD-H), n-hexane/2-propanol = 80/20, flow rate 0.8 mL/min, detection at 230 nm, *t<sub>R</sub>* = 15.2 min (major), 21.1 min (minor), mp = 160.3–161.2 °C.

### ethyl (3*R*,10*S*,10*aR*)-10-(benzo[*d*][1,3]dioxol-5-yl)-3*a*-ethoxy-2-oxo-1,2-dihydro-10*H*-[1,3]dioxolo[4',5':6,7]chromeno[3,2-*d*]oxazole-10*a*(3*aH*)-carboxylate (3*h*)

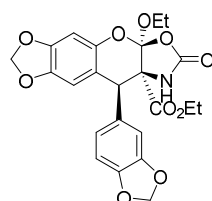

Prepared by the general procedure, and **3h** was isolated as a white solid, > 20:1 d.r., 92 % ee. (42.8 mg, 91% yield), eluent (petroleum ether/ethyl acetate = 8:1). **<sup>1</sup>H NMR** (400 MHz, DMSO-*d*6)  $\delta$  8.78 (s, 1H), 6.91 (d, *J* = 8.0 Hz, 1H), 6.86 (s, 1H), 6.84 (d, *J* = 1.7 Hz, 1H), 6.80 (dd, *J* = 8.0, 1.7 Hz, 1H), 6.30 (s, 1H), 6.05 (s, 2H), 6.00 (s, 2H), 4.70 (s, 1H), 4.18 – 4.02 (m, 3H), 3.99 – 3.89 (m, 1H), 1.22 – 1.12 (m, 6H). **<sup>13</sup>C NMR** (151 MHz, DMSO-*d*6) 166.8, 154.1, 147.2, 147.0, 146.8, 144.3, 143.8, 127.1, 124.3, 120.7, 117.8, 110.7, 108.3, 107.0, 101.6, 101.1, 101.0, 74.5, 61.9, 60.1, 46.5, 14.8, 13.8. **HRMS (ESI)** *m/z* calcd for C<sub>23</sub>H<sub>21</sub>NO<sub>10</sub> [M + Na]<sup>+</sup>: 494.1058, found: 494.1056.  $[\alpha]_D^{25}$  = -74.50 (c = 0.15, CDCl<sub>3</sub>). **HPLC** (CHIRALCEL AD-H), n-hexane/2-propanol = 80/20, flow rate 0.8 mL/min, detection at 230 nm, *t<sub>R</sub>* = 14.9 min (major), 32.5 min (minor), mp = 189.6–190.3 °C.

### ethyl (3*R*,10*S*,10*aR*)-10-(3-bromo-4-methoxyphenyl)-3*a*-ethoxy-2-oxo-1,2-dihydro-10*H*-[1,3]dioxolo[4',5':6,7]chromeno[3,2-*d*]oxazole-10*a*(3*aH*)-carboxylate (3*i*)

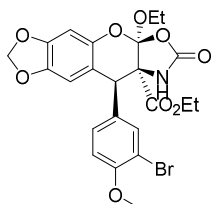

Prepared by the general procedure, and **3i** was isolated as a white solid, > 20:1 d.r., 91 % ee. (49.8mg, 93% yield), eluent (petroleum ether/ethyl acetate = 8:1). **<sup>1</sup>H NMR** (400 MHz, DMSO-*d*6)  $\delta$  8.88 (s, 1H), 7.50 (d, *J* = 2.2 Hz, 1H), 7.30 (dd, *J* = 8.5, 2.2 Hz, 1H), 7.12 (d, *J* = 8.5 Hz, 1H), 6.88 (s, 1H), 6.28 (s, 1H), 6.00 (s, 2H), 4.74 (s, 1H), 4.20 – 4.03 (m, 3H), 3.99 – 3.89 (m, 1H), 3.86 (s, 3H), 1.17 (t, *J* = 7.1 Hz, 6H). **<sup>13</sup>C NMR** (151 MHz, DMSO-*d*6) 166.8, 155.0, 154.1, 146.9, 144.3, 143.9, 134.9, 131.2, 127.3, 120.4, 117.8, 112.5, 110.5, 106.9, 101.6, 101.0, 74.3, 61.9, 60.1, 56.2, 45.7, 14.8, 13.8. **HRMS (ESI)** *m/z* calcd for C<sub>23</sub>H<sub>22</sub>BrNO<sub>9</sub> [M + Na]<sup>+</sup>: 558.0370 and 560.0350, found: 558.0365 and 560.0345.  $[\alpha]_D^{25}$  = -33.17 (c = 0.42, CDCl<sub>3</sub>). **HPLC** (CHIRALCEL AD-H), n-hexane/2-propanol = 80/20, flow rate 0.8 mL/min, detection at 230 nm, *t<sub>R</sub>* = 16.3 min (major), 21.6 min (minor), Mp = 151.7–152.6 °C.

### Ethyl (3*R*,10*S*,10*aR*)-3*a*-ethoxy-2-oxo-10-((*E*)-styryl)-1,2-dihydro-10*H*-[1,3]dioxolo[4',5':6,7]chromeno [3,2-*d*] oxazole-10*a*(3*aH*)-carboxylate (6*a*)

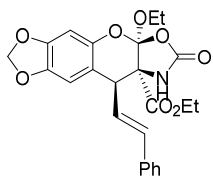

Prepared by the general procedure, and **6a** was isolated as a white solid, > 20:1 d.r., 92% ee. (37.6 mg, 83% yield), eluent (petroleum ether/ethyl acetate = 8:1). **<sup>1</sup>H NMR** (400 MHz, DMSO-*d*6)  $\delta$  9.00 (s, 1H), 7.62 – 7.47 (m, 2H), 7.44 – 7.33 (m, 2H), 7.34 – 7.25 (m, 1H), 6.84 (s, 1H), 6.74 (d, *J* = 15.7 Hz, 1H), 6.66 (s, 1H), 6.28 (dd, *J* = 15.7, 9.9 Hz, 1H), 6.02 (s, 2H), 4.28 (d, *J* = 9.9 Hz, 1H), 4.27–4.13 (m, 2H), 4.13 – 4.04 (m, 1H), 3.98 – 3.89 (m, 1H), 1.25 – 1.13 (m, 6H). **<sup>13</sup>C NMR** (151 MHz, DMSO-*d*6) 167.0, 153.9, 146.9, 144.1, 143.9, 136.7, 136.2, 128.6, 128.0, 126.8, 122.2, 120.3, 117.7, 106.8, 101.6, 101.2, 74.1, 61.8, 60.3, 45.0, 14.9, 14.0. **HRMS (ESI)** *m/z* calcd for C<sub>24</sub>H<sub>23</sub>NO<sub>8</sub> [M + Na]<sup>+</sup>: 476.1316, found: 476.1314.  $[\alpha]_D^{25}$  = -35.33 (c = 0.15, CDCl<sub>3</sub>). **HPLC** (CHIRALCEL AD-H), n-hexane/2-propanol = 80/20, flow rate 0.8 mL/min, detection at 254 nm, *t<sub>R</sub>* = 10.0 min (major), 21.2 min (minor), mp = 168.3–169.5 °C.

## SUPPORTING INFORMATION

### ethyl (3*aR*,10*S*,10*aR*)-3*a*-ethoxy-10-((*E*)-4-methoxystyryl)-2-oxo-1,2-dihydro-10*H*-[1,3]dioxolo[4',5':6,7]chromeno[3,2-*d*]oxazole-10*a*(3*aH*)-carboxylate (**6b**)

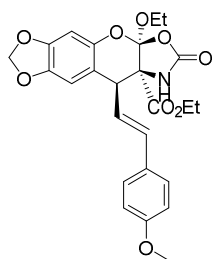

Prepared by the general procedure, and **6b** was isolated as a white solid, >20:1 d.r., 91 % ee, (43.0 mg, 89% yield), eluent (petroleum ether/ethyl acetate = 8:1). **<sup>1</sup>H NMR** (400 MHz, DMSO-*d*6) δ 8.97 (s, 1H), 7.47 (d, *J* = 8.7 Hz, 2H), 6.94 (d, *J* = 8.8 Hz, 2H), 6.83 (s, 1H), 6.69 – 6.63 (m, 2H), 6.10 (dd, *J* = 15.7, 9.9 Hz, 1H), 6.01 (s, 2H), 4.30 – 4.13 (m, 3H), 4.13 – 4.03 (m, 1H), 3.99 – 3.87 (m, 1H), 3.77 (s, 3H), 1.19 (td, *J* = 7.0, 6.0 Hz, 6H). **<sup>13</sup>C NMR** (151 MHz, DMSO-*d*6) 167.0, 159.2, 153.9, 146.9, 144.7, 143.9, 136.2, 128.9, 128.1, 120.5, 119.5, 117.6, 114.0, 106.8, 101.5, 101.2, 74.2, 61.8, 60.3, 55.2, 45.0, 14.9, 14.0. **HRMS (ESI)** *m/z* calcd for C<sub>25</sub>H<sub>25</sub>NO<sub>9</sub> [M + Na]<sup>+</sup>: 506.1422, found: 506.1418. [α]<sub>D</sub><sup>25</sup> = -41.67 (c = 0.15, CDCl<sub>3</sub>). **HPLC**

(CHIRALCEL AD-H), n-hexane/2-propanol = 80/20, flow rate 0.8 mL/min, detection at 254 nm, *t<sub>R</sub>* = 16.7 min (major), 26.2 min (minor), mp = 183.8–184.6 °C.

### ethyl (3*aR*,10*S*,10*aR*)-3*a*-ethoxy-10-((*E*)-3-methoxystyryl)-2-oxo-1,2-dihydro-10*H*-[1,3]dioxolo[4',5':6,7]chromeno[3,2-*d*]oxazole-10*a*(3*aH*)-carboxylate (**6c**)

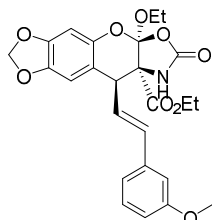

Prepared by the general procedure, and **6c** was isolated as a white solid, > 20:1 d.r., 95% ee. (40.9 mg, 83% yield), eluent (petroleum ether/ethyl acetate = 8:1). **<sup>1</sup>H NMR** (400 MHz, DMSO-*d*6) δ 9.00 (s, 1H), 7.39 – 7.23 (m, 1H), 7.18 – 7.13 (m, 1H), 7.10 – 7.05 (m, 1H), 6.90 – 6.85 (m, 1H), 6.84 (s, 1H), 6.71 (d, *J* = 15.7 Hz, 1H), 6.66 (s, 1H), 6.27 (dd, *J* = 15.7, 9.9 Hz, 1H), 6.02 (s, 2H), 4.28 (d, *J* = 9.9 Hz, 1H), 4.25 – 4.15 (m, 2H), 4.13 – 4.04 (m, 1H), 3.99 – 3.88 (m, 1H), 3.73 (s, 3H) 1.26-1.14 (m, 6H). **<sup>13</sup>C NMR** (151 MHz, DMSO-*d*6) 167.0, 159.5, 153.9, 146.9, 144.1, 143.9, 137.6, 136.6, 129.6, 122.4, 120.2, 119.6, 117.7, 113.9, 111.7, 106.8, 101.6,

101.2, 74.1, 61.9, 60.3, 55.1, 45.0, 14.9, 14.0. **HRMS (ESI)** *m/z* calcd for C<sub>25</sub>H<sub>25</sub>NO<sub>9</sub> [M + Na]<sup>+</sup>: 506.1422, found: 506.1428. [α]<sub>D</sub><sup>25</sup> = -29.27 (c = 0.15, CDCl<sub>3</sub>). **HPLC** (CHIRALCEL AD-H), n-hexane/2-propanol = 80/20, flow rate 0.8 mL/min, detection at 254 nm, *t<sub>R</sub>* = 10.4 min (major), 31.6 min (minor), mp = 179.7–181.5 °C.

### ethyl (3*aR*,10*S*,10*aR*)-3*a*-ethoxy-10-((*E*)-2-methoxystyryl)-2-oxo-1,2-dihydro-10*H*-[1,3]dioxolo[4',5':6,7]chromeno[3,2-*d*]oxazole-10*a*(3*aH*)-carboxylate (**6d**)

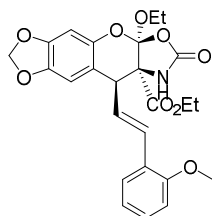

Prepared by the general procedure, and **6d** was isolated as a white solid, > 20:1 d.r., 98 % ee. (4.4 mg, 92% yield), eluent (petroleum ether/ethyl acetate = 8:1). **<sup>1</sup>H NMR** (400 MHz, DMSO-*d*6) δ 8.97 (s, 1H), 7.77 – 7.59 (m, 1H), 7.37 – 7.22 (m, 1H), 7.09 – 6.92 (m, 3H), 6.83 (s, 1H), 6.69 (s, 1H), 6.18 (dd, *J* = 15.8, 9.9 Hz, 1H), 6.02 (s, 2H), 4.27 (d, *J* = 9.9 Hz, 1H), 4.25 – 4.15 (m, 2H), 4.13 – 4.04 (m, 1H), 3.98 – 3.87 (m, 1H), 3.80 (s, 3H) 1.34 – 1.11 (m, 6H). **<sup>13</sup>C NMR** (151 MHz, DMSO-*d*6) 167.0, 156.2, 153.9, 146.9, 144.1, 144.0, 131.2, 129.7, 127.0, 124.9, 122.2, 120.5, 120.4, 117.7, 111.3, 106.7, 101.5, 101.2, 74.2, 61.9, 60.3, 55.5, 45.4, 14.9, 13.8.

**HRMS (ESI)** *m/z* calcd for C<sub>25</sub>H<sub>25</sub>NO<sub>9</sub> [M + Na]<sup>+</sup>: 506.1422, found: 506.1418. [α]<sub>D</sub><sup>25</sup> = -35.86 (c = 0.15, CDCl<sub>3</sub>). **HPLC** (CHIRALCEL AD-H), n-hexane/2-propanol = 80/20, flow rate 0.8 mL/min, detection at 254 nm, *t<sub>R</sub>* = 12.2 min (major), 60.3 min (minor), mp = 183.2–184.6 °C.

### ethyl (3*aR*,10*S*,10*aR*)-3*a*-ethoxy-10-((*E*)-4-methylstyryl)-2-oxo-1,2-dihydro-10*H*-[1,3]dioxolo[4',5':6,7]chromeno[3,2-*d*]oxazole-10*a*(3*aH*)-carboxylate (**6e**)

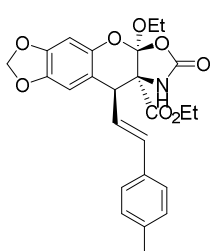

Prepared by the general procedure, and **6e** was isolated as a white solid, > 20:1 d.r., 96 % ee. (40.6 mg, 87% yield), eluent (petroleum ether/ethyl acetate = 8:1). **<sup>1</sup>H NMR** (400 MHz, DMSO-*d*6) δ 8.98 (s, 1H), 7.43 (d, *J* = 8.2 Hz, 2H), 7.18 (d, *J* = 7.8 Hz, 2H), 6.83 (s, 1H), 6.69 (d, *J* = 15.7 Hz, 1H), 6.64 (d, *J* = 1.0 Hz, 1H), 6.21 (dd, *J* = 15.7, 9.9 Hz, 1H), 6.08 – 5.95 (m, 2H), 4.26 (d, *J* = 9.9 Hz, 1H), 4.24 – 4.14 (m, 2H), 4.13 – 4.04 (m, 1H), 3.99 – 3.87 (m, 1H), 2.30 (s, 3H), 1.19 (td, *J* = 7.1, 4.8 Hz, 6H). **<sup>13</sup>C NMR** (151 MHz, DMSO-*d*6) 167.0, 153.9, 146.9, 144.1, 143.9, 137.5, 136.6, 133.5, 129.1, 126.7, 120.9, 120.4, 117.7, 106.7, 101.6, 101.2, 74.1, 61.8, 60.3, 45.0, 14.9, 14.0. **HRMS (ESI)** *m/z* calcd for C<sub>25</sub>H<sub>25</sub>NO<sub>8</sub> [M + Na]<sup>+</sup>:

490.1472, found: 490.1477. [α]<sub>D</sub><sup>25</sup> = -41.86 (c = 0.15, CDCl<sub>3</sub>). **HPLC** (CHIRALCEL AD-H), n-hexane/2-propanol = 80/20, flow rate 0.8 mL/min, detection at 254 nm, *t<sub>R</sub>* = 11.2 min (major), 18.6 min (minor), mp = 166.2–167.1 °C



**ethyl (3*aR*,10*S*,10*aR*)-3*a*-ethoxy-10-((*E*)-3-methylstyryl)-2-oxo-1,2-dihydro-10*H*-[1,3]dioxolo[4',5':6,7]chromeno[3,2-*d*]oxazole-10*a*(3*aH*)-carboxylate (6*f*)**

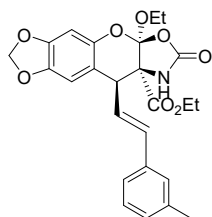

Prepared by the general procedure, and **6f** was isolated as a white solid, > 20:1 d.r., 94 % ee. (47.0 mg, 87% yield), eluent (petroleum ether/ethyl acetate = 8:1). **<sup>1</sup>H NMR** (400 MHz, DMSO-*d*6)  $\delta$  8.97 (s, 1H), 7.46 – 7.36 (m, 1H), 7.34 – 7.29 (m, 1H), 7.29 – 7.21 (m, 1H), 7.16 – 7.08 (m, 1H), 6.83 (s, 1H), 6.70 (d, *J* = 15.7 Hz, 1H), 6.65 (s, 1H), 6.26 (dd, *J* = 15.7, 10.3 Hz, 1H), 6.02 (s, 2H), 4.28 (d, *J* = 10.3 Hz, 1H), 4.24 – 4.13 (m, 2H), 4.09 (dq, *J* = 9.7, 7.0 Hz, 1H), 4.14 – 4.02 (m, 1H), 2.33 (s, 3H), 1.28 – 0.91 (m, 6H). **<sup>13</sup>C NMR** (151 MHz, DMSO-*d*6)  $\delta$  167.0, 153.9, 146.9, 144.1, 144.0, 137.7, 136.8, 136.2, 128.7, 128.5, 127.2, 124.1, 121.9, 120.3, 117.7, 106.8, 101.6, 101.2, 74.1, 61.8, 60.3, 45.0, 21.0, 14.9, 14.0. **HRMS (ESI)** *m/z* calcd for C<sub>25</sub>H<sub>25</sub>NO<sub>8</sub> [M + Na]<sup>+</sup>: 490.1472, found: 490.1475.  $[\alpha]_D^{25}$  = -46.75 (c = 0.15, CDCl<sub>3</sub>). **HPLC** (CHIRALCEL AD-H), n-hexane/2-propanol = 80/20, flow rate 0.8 mL/min, detection at 254 nm, *t<sub>R</sub>* = 8.4 min (major), 17.0 min (minor), mp = 174.3–175.6 °C

**ethyl (3*aR*,10*S*,10*aR*)-3*a*-ethoxy-10-((*E*)-2-methylstyryl)-2-oxo-1,2-dihydro-10*H*-[1,3]dioxolo[4',5':6,7]chromeno[3,2-*d*]oxazole-10*a*(3*aH*)-carboxylate (6*g*)**

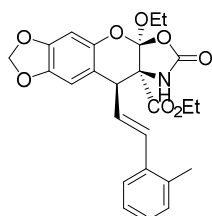

Prepared by the general procedure, and **6g** was isolated as a white solid, > 20:1 d.r., 97 % ee. (37.8 mg, 81% yield), eluent (petroleum ether/ethyl acetate = 8:1). **<sup>1</sup>H NMR** (400 MHz, DMSO-*d*6)  $\delta$  8.97 (s, 1H), 7.75 – 7.54 (m, 1H), 7.37 – 7.14 (m, 3H), 6.94 (d, *J* = 15.7 Hz, 1H), 6.83 (s, 1H), 6.70 (s, 1H), 6.13 (dd, *J* = 15.7, 9.8 Hz, 1H), 6.02 (s, 2H), 4.34 (d, *J* = 9.8 Hz, 1H), 4.29 – 4.16 (m, 2H), 4.15 – 4.04 (m, 1H), 3.99 – 3.86 (m, 1H), 2.29 (s, 3H), 1.33 – 0.95 (m, 6H). **<sup>13</sup>C NMR** (151 MHz, DMSO-*d*6)  $\delta$  167.1, 154.0, 147.0, 144.2, 144.0, 135.4, 135.1, 134.9, 130.2, 128.0, 126.3, 126.1, 123.4, 120.4, 117.8, 106.9, 101.6, 101.3, 74.2, 62.0, 60.4, 45.3, 19.3, 14.9, 14.0. **HRMS (ESI)** *m/z* calcd for C<sub>25</sub>H<sub>25</sub>NO<sub>8</sub> [M + Na]<sup>+</sup>: 490.1472, found: 490.1473.  $[\alpha]_D^{25}$  = -47.23 (c = 0.15, CDCl<sub>3</sub>). **HPLC** (CHIRALCEL AD-H), n-hexane/2-propanol = 80/20, flow rate 0.8 mL/min, detection at 254 nm, *t<sub>R</sub>* = 8.4 min (major), 22.7 min (minor), mp = 167.3–168.8 °C

**ethyl (3*aR*,10*S*,10*aR*)-3*a*-ethoxy-10-((*E*)-4-fluorostyryl)-2-oxo-1,2-dihydro-10*H*-[1,3]dioxolo[4',5':6,7]chromeno[3,2-*d*]oxazole-10*a*(3*aH*)-carboxylate (6*h*)**

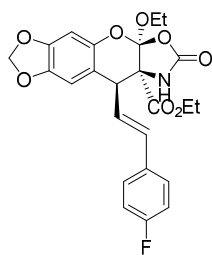

Prepared by the general procedure, and **6h** was isolated as a white solid, > 20:1 d.r., 97 % ee. (39.1 mg, 83% yield), eluent (petroleum ether/ethyl acetate = 8:1). **<sup>1</sup>H NMR** (400 MHz, DMSO-*d*6)  $\delta$  8.98 (s, 1H), 7.68 – 7.50 (m, 2H), 7.32 – 7.09 (m, 2H), 6.84 (s, 1H), 6.73 (d, *J* = 15.7 Hz, 1H), 6.68 (s, 1H), 6.21 (dd, *J* = 15.7, 9.9 Hz, 1H), 6.02 (s, 2H), 4.27 (d, *J* = 9.9 Hz, 1H), 4.25 – 4.13 (m, 2H), 4.13 – 4.03 (m, 1H), 3.98 – 3.87 (m, 1H), 1.25 – 1.12 (m, 6H). **<sup>13</sup>C NMR** (151 MHz, DMSO-*d*6)  $\delta$  167.5, 162.4 (d, *J* = 245.0 Hz), 154.4, 147.4, 144.6, 144.4, 135.9, 133.3 (d, *J* = 3.1 Hz), 129.3, 129.2, 122.6, 120.7, 118.2, 116.0, 115.8, 107.3, 102.1, 101.7, 74.6, 62.3, 60.8, 45.4, 15.4, 14.5. **<sup>19</sup>F NMR** (376 MHz, DMSO-*d*6)  $\delta$  -113.87. **HRMS (ESI)** *m/z* calcd for C<sub>24</sub>H<sub>22</sub>FNO<sub>8</sub> [M + Na]<sup>+</sup>: 494.1222, found: 494.1220.  $[\alpha]_D^{25}$  = -26.73 (c = 0.15, CDCl<sub>3</sub>). **HPLC** (CHIRALCEL AD-H), n-hexane/2-propanol = 80/20, flow rate 0.8 mL/min, detection at 254 nm, *t<sub>R</sub>* = 12.9 min (major), 18.1 min (minor), mp = 191.3–192.7 °C

**ethyl (3*aR*,10*S*,10*aR*)-3*a*-ethoxy-10-((*E*)-2-fluorostyryl)-2-oxo-1,2-dihydro-10*H*-[1,3]dioxolo[4',5':6,7]chromeno[3,2-*d*]oxazole-10*a*(3*aH*)-carboxylate (6*i*)**

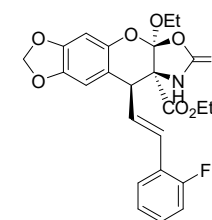

Prepared by the general procedure, and **6i** was isolated as a white solid, > 20:1 d.r., 99 % ee. (41.9 mg, 89% yield), eluent (petroleum ether/ethyl acetate = 8:1). **<sup>1</sup>H NMR** (400 MHz, DMSO-*d*6)  $\delta$  8.99 (s, 1H), 7.92 – 7.72 (m, 1H), 7.43 – 7.29 (m, 1H), 7.29 – 7.16 (m, 2H), 6.87 (d, *J* = 15.8 Hz, 1H), 6.84 (s, 1H), 6.72 (s, 1H), 6.35 (dd, *J* = 15.8, 9.9 Hz, 1H), 6.02 (s, 2H), 4.35 (d, *J* = 9.9 Hz, 1H), 4.29 – 4.14 (m, 2H), 4.14 – 4.04 (m, 1H), 3.99 – 3.88 (m, 1H), 1.33 – 1.08 (m, 6H). **<sup>13</sup>C NMR** (151 MHz, DMSO-*d*6)  $\delta$  167.0, 159.4 (d, *J* = 247.4 Hz), 153.9, 147.0, 144.2, 143.9, 129.9 (d, *J* = 8.5 Hz), 128.3 (d, *J* = 4.6 Hz), 127.9 (d, *J* = 3.2 Hz), 125.2 (d, *J* = 3.2 Hz), 124.6 (d, *J* = 3.3 Hz), 123.8 (d, *J* = 12.1 Hz), 120.1, 117.7, 115.6 (d, *J* = 21.7 Hz), 106.8, 101.6, 101.2, 74.1, 61.9, 60.3, 45.3, 14.9, 13.9. **<sup>19</sup>F NMR** (376 MHz, DMSO-*d*6)  $\delta$  -119.12. **HRMS (ESI)** *m/z* calcd for C<sub>24</sub>H<sub>22</sub>FNO<sub>8</sub> [M + Na]<sup>+</sup>: 494.1222,

## SUPPORTING INFORMATION

found: 494.1225.  $[\alpha]_D^{25} = -29.67$  ( $c = 0.15$ ,  $\text{CDCl}_3$ ). **HPLC** (CHIRALCEL AD-H), n-hexane/2-propanol = 80/20, flow rate 0.8 mL/min, detection at 254 nm,  $t_R = 9.5$  min (major), 22.3 min (minor), mp = 183.1–184.9 °C

### ethyl (3*aR*,10*S*,10*aR*)-10-((*E*)-4-chlorostyryl)-3*a*-ethoxy-2-oxo-1,2-dihydro-10*H*-[1,3]dioxolo[4',5':6,7]chromeno[3,2-*d*]oxazole-10*a*(3*aH*)-carboxylate (**6j**)

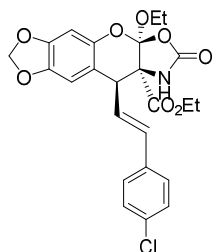

Prepared by the general procedure, and **6j** was isolated as a white solid, > 20:1 d.r., 96 % ee. (44.8 mg, 92% yield), eluent (petroleum ether/ethyl acetate = 8:1). **<sup>1</sup>H NMR** (400 MHz,  $\text{DMSO-}d_6$ )  $\delta$  8.97 (s, 1H), 7.57 (d,  $J = 8.2$  Hz, 2H), 7.44 (d,  $J = 8.2$  Hz, 2H), 6.83 (s, 1H), 6.74 (d,  $J = 15.7$  Hz, 1H), 6.67 (s, 1H), 6.30 (dd,  $J = 15.7$ , 9.9 Hz, 1H), 6.01 (s, 2H), 4.29 (d,  $J = 9.9$  Hz, 1H), 4.26 – 4.13 (m, 2H), 4.13 – 4.04 (m, 1H), 3.99 – 3.88 (m, 1H), 1.32 – 1.08 (m, 6H). **<sup>13</sup>C NMR** (151 MHz,  $\text{DMSO-}d_6$ )  $\delta$  166.9, 153.8, 146.9, 144.1, 143.9, 135.4, 135.2, 132.5, 128.5, 128.4, 123.3, 120.1, 117.6, 106.8, 101.6, 101.2, 74.0, 61.8, 60.3, 45.0, 14.8, 14.0. **HRMS (ESI)**  $m/z$  calcd for  $\text{C}_{24}\text{H}_{22}\text{ClNO}_8$  [ $\text{M} + \text{Na}$ ]<sup>+</sup>: 510.0926 and 512.0897, found: 510.0930 and 512.0898.  $[\alpha]_D^{25} = -60.50$

( $c = 0.15$ ,  $\text{CDCl}_3$ ). **HPLC** (CHIRALCEL AD-H), n-Hexane/2-propanol = 80/20, flow rate 0.8 mL/min, detection at 254 nm,  $t_R = 13.5$  min (major), 20.030 min (minor), mp = 198.9–200.3 °C

### ethyl (3*aR*,10*S*,10*aR*)-10-((*E*)-4-bromostyryl)-3*a*-ethoxy-2-oxo-1,2-dihydro-10*H*-[1,3]dioxolo[4',5':6,7]chromeno[3,2-*d*]oxazole-10*a*(3*aH*)-carboxylate (**6k**)

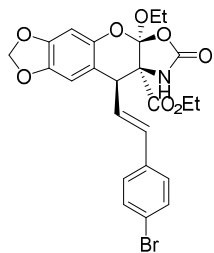

Prepared by the general procedure, and **6k** was isolated as a white solid, > 20:1 d.r., 96 % ee. (48.3 mg, 91% yield), eluent (petroleum ether/ethyl acetate = 8:1). **<sup>1</sup>H NMR** (400 MHz,  $\text{DMSO-}d_6$ )  $\delta$  8.97 (s, 1H), 7.57 (d,  $J = 8.2$  Hz, 2H), 7.44 (d,  $J = 8.2$  Hz, 2H), 6.83 (s, 1H), 6.74 (d,  $J = 15.7$  Hz, 1H), 6.67 (s, 1H), 6.30 (dd,  $J = 15.7$ , 9.9 Hz, 1H), 6.01 (s, 2H), 4.29 (d,  $J = 9.9$  Hz, 1H), 4.26 – 4.13 (m, 2H), 4.13 – 4.03 (m, 1H), 3.99 – 3.87 (m, 1H), 1.32 – 1.08 (m, 6H). **<sup>13</sup>C NMR** (151 MHz,  $\text{DMSO-}d_6$ )  $\delta$  167.0, 153.9, 147.0, 144.2, 143.9, 135.5, 135.5, 131.5, 128.8, 123.3, 121.1, 120.1, 117.7, 106.8, 101.6, 101.2, 74.0, 61.9, 60.3, 45.0, 14.9, 14.0. **HRMS (ESI)**  $m/z$  calcd for  $\text{C}_{24}\text{H}_{22}\text{BrNO}_8$  [ $\text{M} + \text{Na}$ ]<sup>+</sup>: 554.0421 and 556.0401, found: 554.0423 and 556.0403.  $[\alpha]_D^{25} = -43.86$

( $c = 0.15$ ,  $\text{CDCl}_3$ ). **HPLC** (CHIRALCEL AD-H), n-Hexane/2-propanol = 80/20, flow rate 0.8 mL/min, detection at 254 nm,  $t_R = 14.0$  min (major), 21.6 min (minor), mp = 201.1–202.7 °C

### ethyl (3*aR*,10*S*,10*aR*)-3*a*-ethoxy-2-oxo-10-((*E*)-2-(thiophen-2-yl)vinyl)-1,2-dihydro-10*H*-[1,3]dioxolo[4',5':6,7]chromeno[3,2-*d*]oxazole-10*a*(3*aH*)-carboxylate (**6l**)

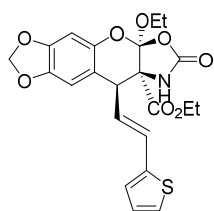

Prepared by the general procedure, and **6l** was isolated as a white solid, > 20:1 d.r., 97 % ee. (42.3 mg, 93% yield), eluent (petroleum ether/ethyl acetate = 8:1). **<sup>1</sup>H NMR** (400 MHz,  $\text{DMSO-}d_6$ )  $\delta$  9.05 (s, 1H), 7.48 (dd,  $J = 5.0$ , 1.2 Hz, 1H), 7.18 (dd,  $J = 3.5$ , 1.2 Hz, 1H), 7.05 (dd,  $J = 5.0$ , 3.5 Hz, 1H), 6.90 (d,  $J = 15.4$  Hz, 1H), 6.84 (s, 1H), 6.59 (s, 1H), 6.11 – 5.96 (m, 3H), 4.26 (d,  $J = 10.1$  Hz, 1H), 4.24 – 4.14 (m, 2H), 4.12 – 4.03 (m, 1H), 3.97 – 3.88 (m, 1H), 1.40 – 0.98 (m, 6H). **<sup>13</sup>C NMR** (151 MHz,  $\text{DMSO-}d_6$ ) 167.0, 153.9, 146.9, 144.1, 143.9, 140.8, 129.9, 127.7, 126.8, 125.9, 121.1, 120.3, 117.7, 106.5, 101.6, 101.2, 73.9, 61.9, 60.3, 44.9, 14.9, 14.0.

**HRMS (ESI)**  $m/z$  calcd for  $\text{C}_{22}\text{H}_{21}\text{NO}_8\text{S}$  [ $\text{M} + \text{Na}$ ]<sup>+</sup>: 482.0880, found: 482.0880.  $[\alpha]_D^{25} = -33.33$  ( $c = 0.15$ ,  $\text{CDCl}_3$ ). **HPLC** (CHIRALCEL AD-H), n-hexane/2-propanol = 80/20, flow rate 0.8 mL/min, detection at 230 nm,  $t_R = 10.4$  min (major), 31.0 min (minor), mp = 178.4–179.8 °C.

### ethyl (3*aR*,10*S*,10*aR*)-3*a*-ethoxy-10-((*E*)-2-(naphthalen-1-yl)vinyl)-2-oxo-1,2-dihydro-10*H*-[1,3]dioxolo[4',5':6,7]chromeno[3,2-*d*]oxazole-10*a*(3*aH*)-carboxylate (**6m**)

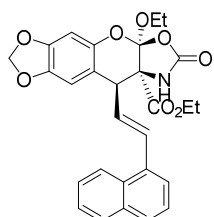

Prepared by the general procedure, and **6m** was isolated as a white solid, > 20:1 d.r., 94 % ee. (41.7 mg, 83% yield), eluent (petroleum ether/ethyl acetate = 8:1). **<sup>1</sup>H NMR** (400 MHz,  $\text{DMSO-}d_6$ )  $\delta$  9.05 (s, 1H), 8.18 – 8.10 (m, 1H), 8.04 – 7.82 (m, 3H), 7.67 – 7.42 (m, 4H), 6.87 (s, 1H), 6.78 (s, 1H), 6.30 (dd,  $J = 15.4$ , 9.9 Hz, 1H), 6.03 (s, 2H), 4.52 (d,  $J = 9.9$  Hz, 1H), 4.31 – 4.17 (m, 2H), 4.17 – 4.07 (m, 1H), 4.01 – 3.90 (m, 1H), 1.30 – 1.14 (m, 6H). **<sup>13</sup>C NMR** (151 MHz,  $\text{DMSO-}d_6$ ) 167.1, 153.9, 146.9, 144.2, 144.0, 134.1, 133.6, 133.2, 130.5, 128.5, 128.2, 126.4, 125.9, 125.7, 125.1, 124.3, 123.4, 120.4, 117.8, 106.9, 101.6, 101.2, 74.2, 61.9, 60.3, 45.3, 14.9,

## SUPPORTING INFORMATION

14.0. **HRMS (ESI)**  $m/z$  calcd for  $C_{28}H_{25}NO_8$   $[M + Na]^+$ : 526.1472, found: 526.1471.  $[\alpha]_D^{25} = -38.32$  ( $c = 0.15$ ,  $CDCl_3$ ). HPLC (CHIRALCEL AD-H), n-hexane/2-propanol = 80/20, flow rate 0.8 mL/min, detection at 230 nm,  $t_R = 11.2$  min (major), 39.8 min (minor), mp = 191.5–192.8 °C.

### 1.5 Tertiary amino-urea catalyzed asymmetric cyclization reaction of QMs and 2-NCO at 1mmol scale.

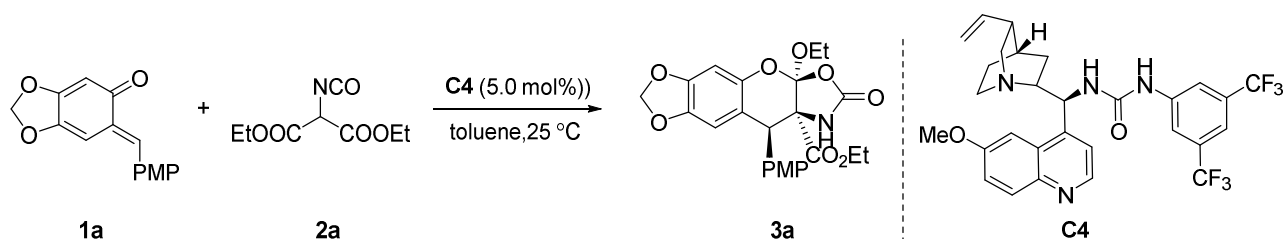

A mixture of **1a** (256 mg, 1.0 mmol) and **C4** (29 mg, 0.05 mmol) in dry toluene (10.0 mL) was stirred for 5 min at 25 °C in a Schlenk tube under an atmosphere of argon. Then diethyl 2-isocyanatomalonate **2a** (30 mg, 1.5 mmol) was added to the tube containing the **1** and **C4** via microsyringe. When the disappearance of starting material **1** was monitored by TLC plate, the reaction was quenched with methanol, then concentrated in vacuo. The product **3a** (370 mg, 81 % yield, 91 % ee) was purified by column chromatography on silica gel (PE/EA 8:1).

### 3. Reference

1. Leonard Jurd., *Tetrahedron.*, **1977**, *33*, 163-168.
2. Alafate Adili, Zhong-Lin Tao, Dian-Feng Chen and Zhi-Yong Han., *Org. Biomol. Chem.*, **2015**, *13*, 2247-2250.
3. Jin-xin Liu, Ya-ling Li, Miao-lin Ke, Min-jie Liu, Ping-ping Zhan, You-Cai Xiao, and Fener Chen., *J. Org. Chem.*, **2020**, *85*, 15360–15367.
4. Sakamoto Shota; Kazumi Naoya; Kobayashi Yusuke; Tsukano Chihiro; Takemoto Yoshiji., *Org. Let.* **2014**, *16*, 4758-4761.

# SUPPORTING INFORMATION

## 4. Spectral Data

**<sup>1</sup>H NMR Spectrum of Compound 3a (400 MHz, DMSO-d<sub>6</sub>)**

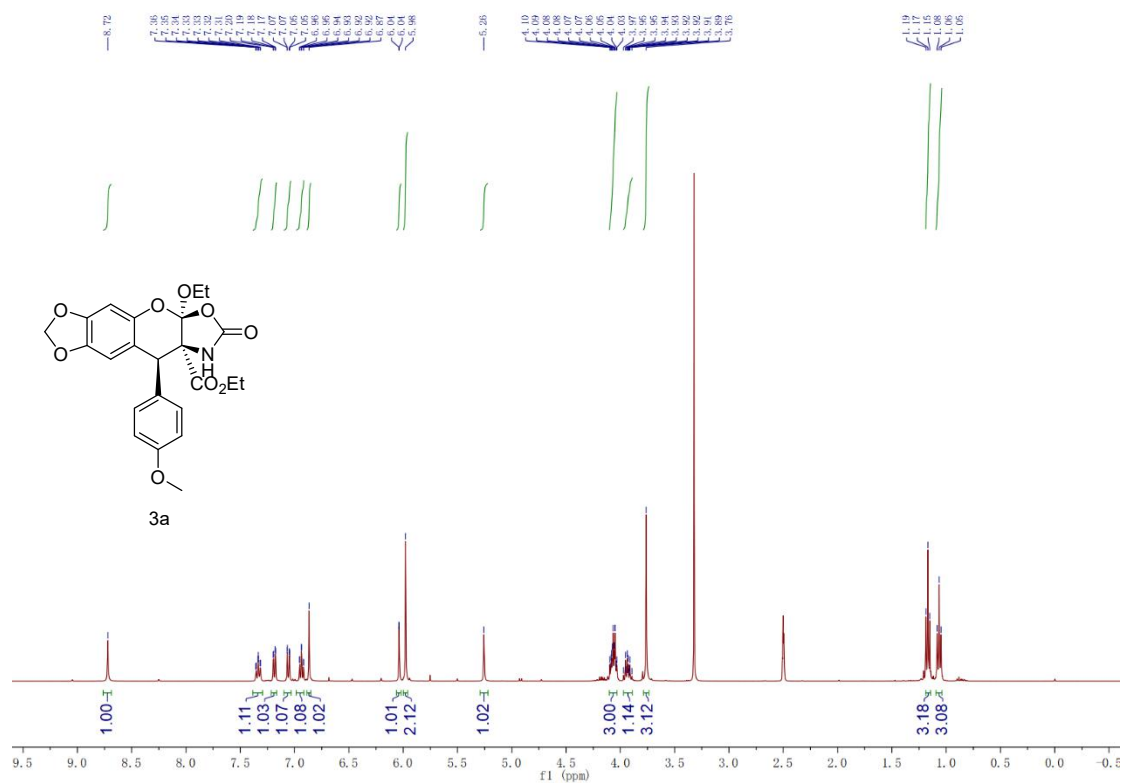

**<sup>13</sup>C NMR Spectrum of Compound 3a (151 MHz, DMSO-d<sub>6</sub>)**

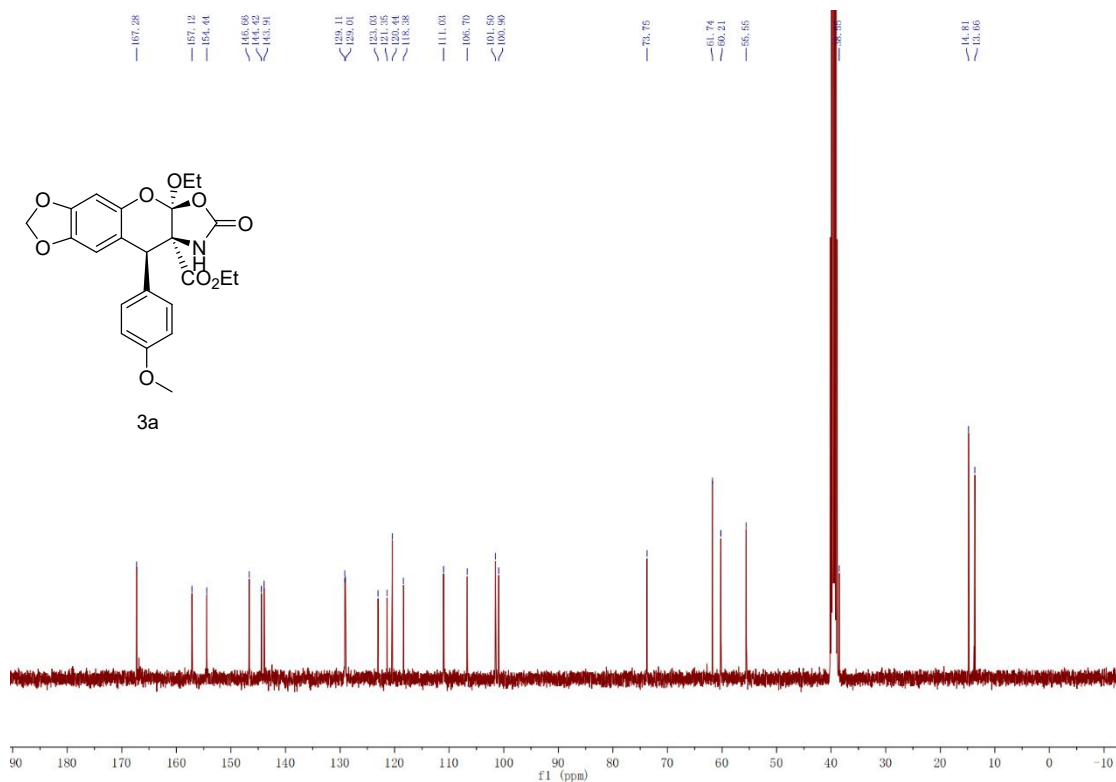

# SUPPORTING INFORMATION

## <sup>1</sup>H NMR Spectrum of Compound 3b (400 MHz, DMSO-d<sub>6</sub>)

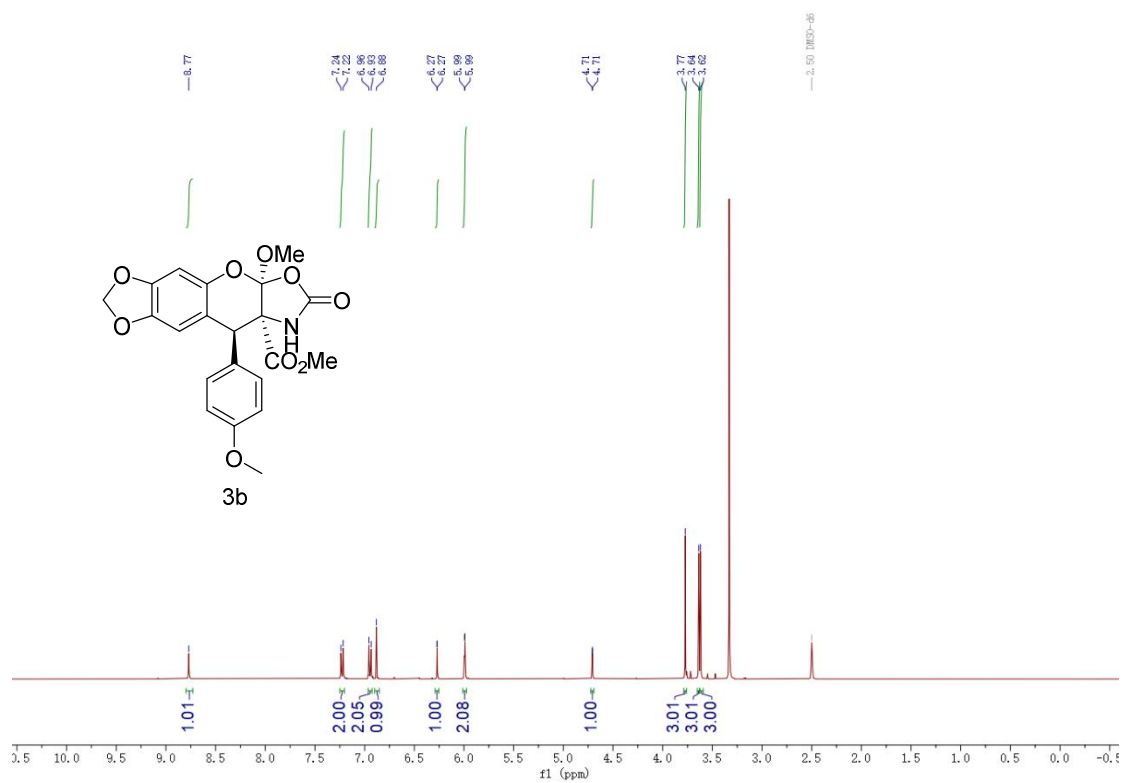

## <sup>13</sup>C NMR Spectrum of Compound 3b (151 MHz, DMSO-d<sub>6</sub>)

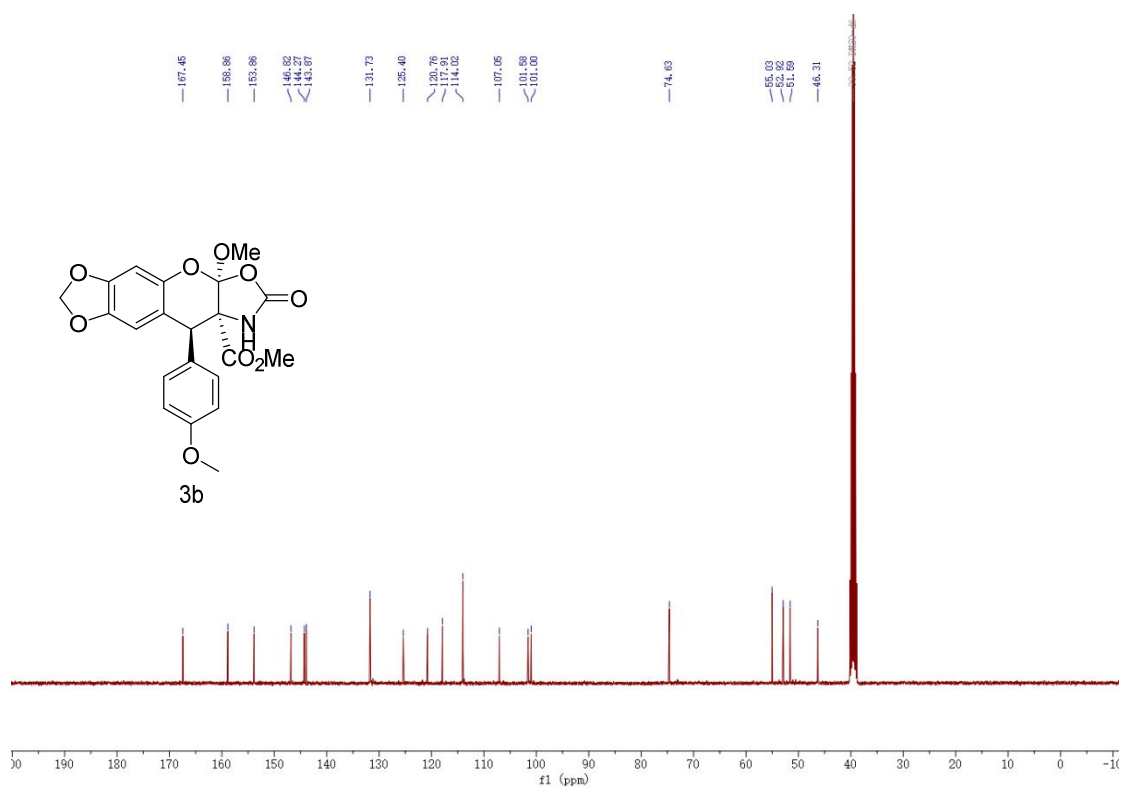

# SUPPORTING INFORMATION

**<sup>1</sup>H NMR Spectrum of Compound 3c (400 MHz, DMSO-*d*<sub>6</sub>)**

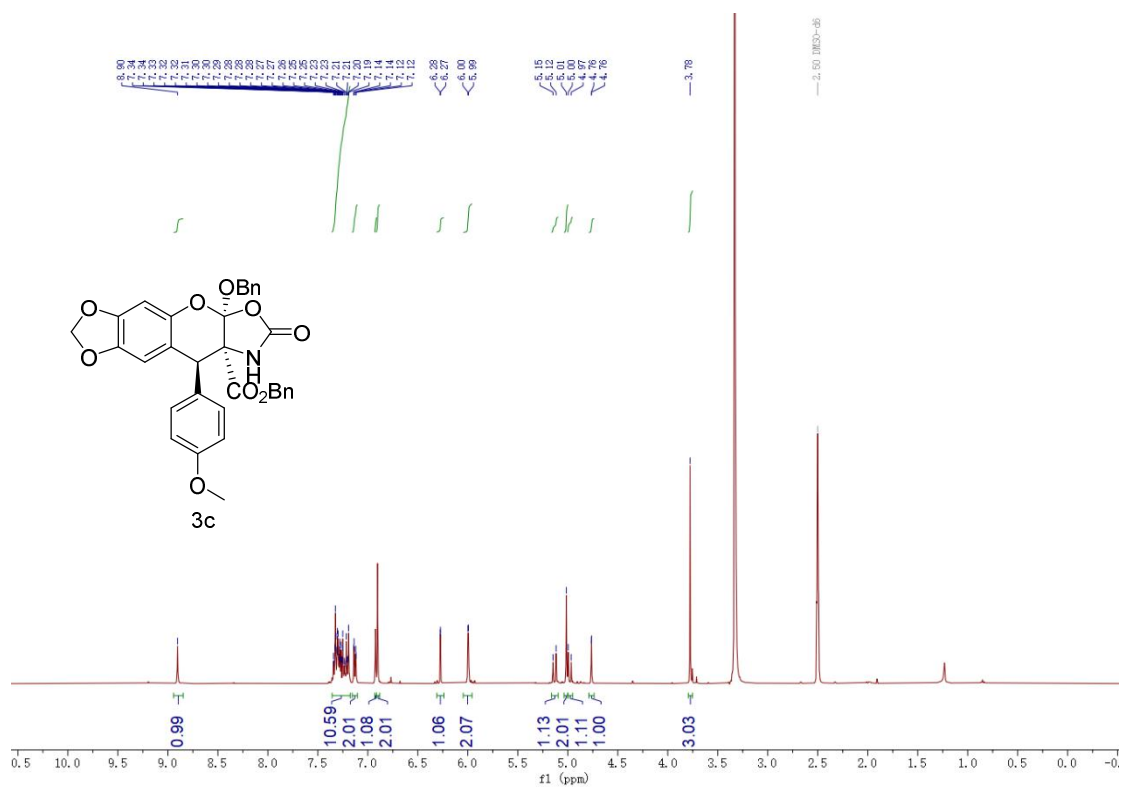

**<sup>13</sup>C NMR Spectrum of Compound 3c (151 MHz, DMSO-*d*<sub>6</sub>)**

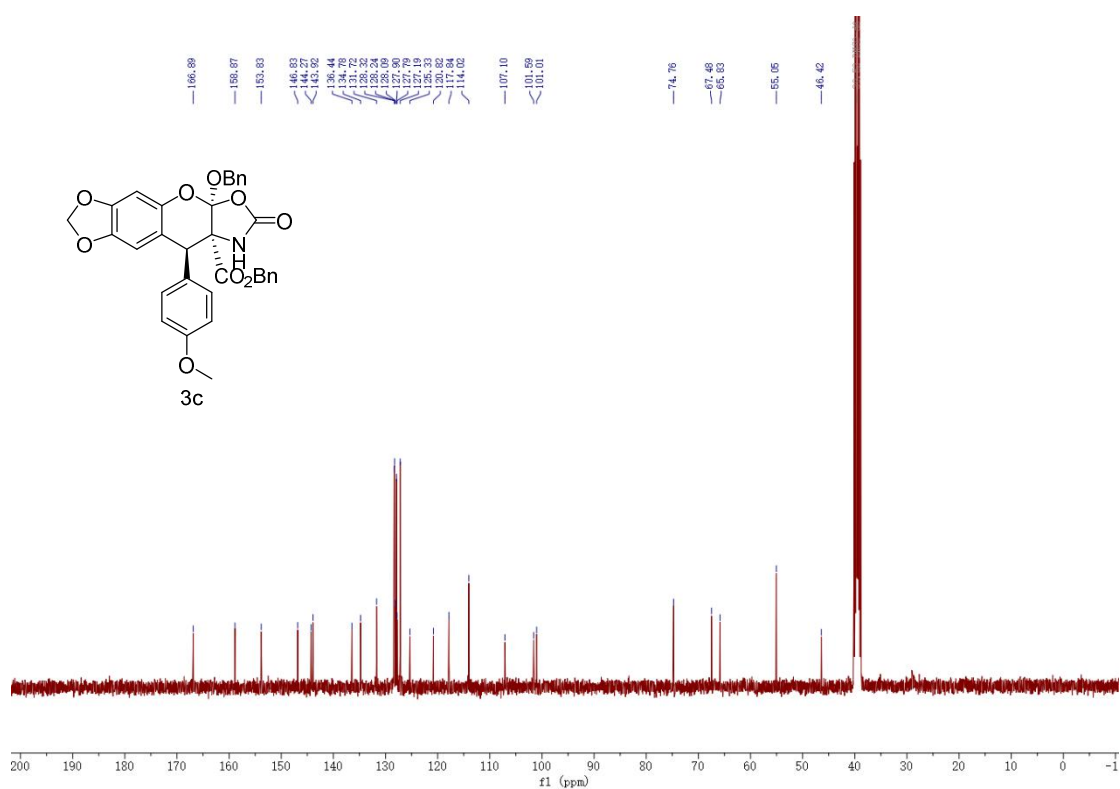

**<sup>1</sup>H NMR Spectrum of Compound 3d (400 MHz, DMSO-*d*<sub>6</sub>)**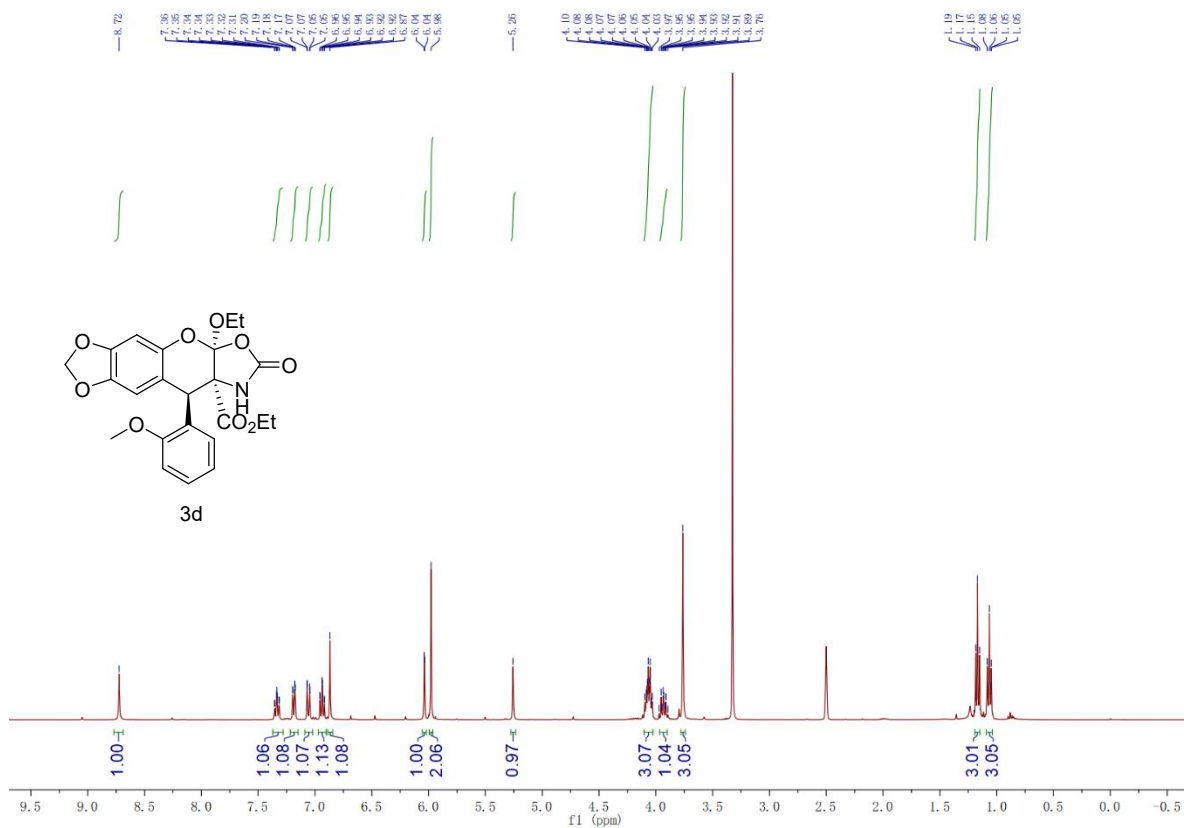**<sup>13</sup>C NMR Spectrum of Compound 3d (151 MHz, DMSO-*d*<sub>6</sub>)**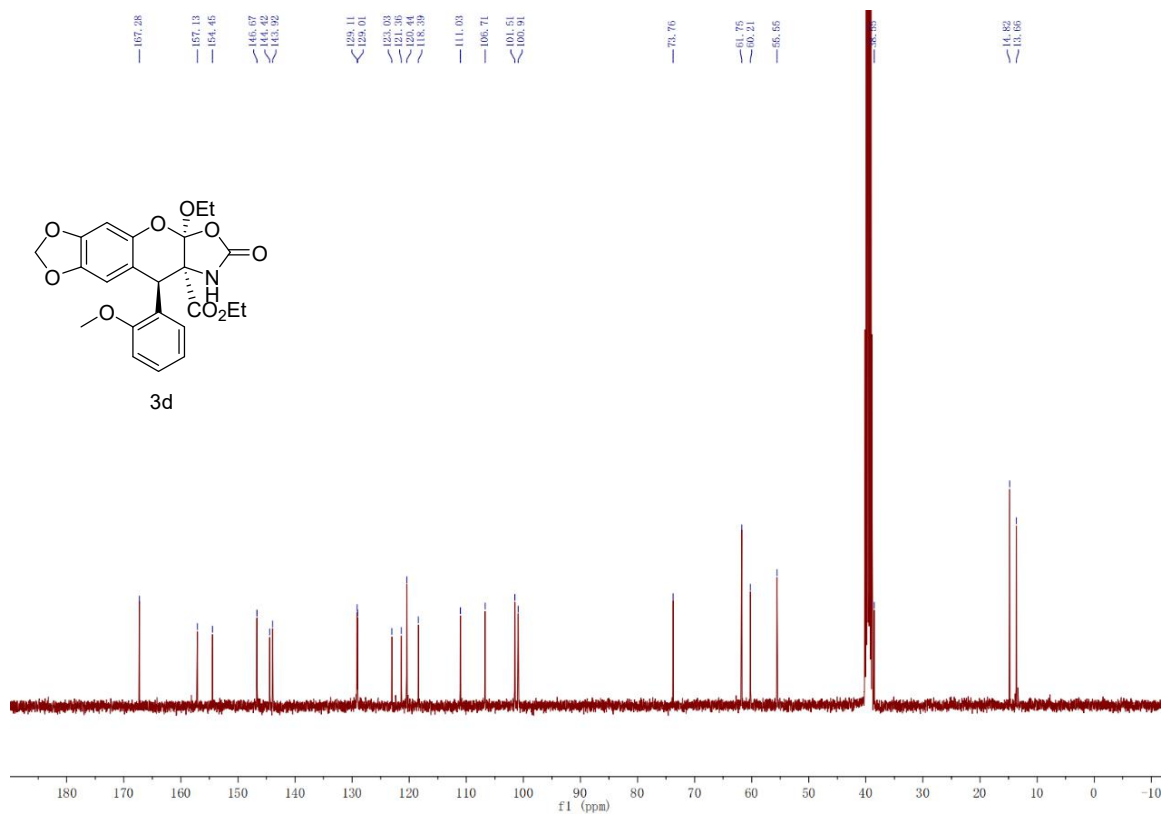



# SUPPORTING INFORMATION

## <sup>1</sup>H NMR Spectrum of Compound 3e (400 MHz, DMSO-d<sub>6</sub>)

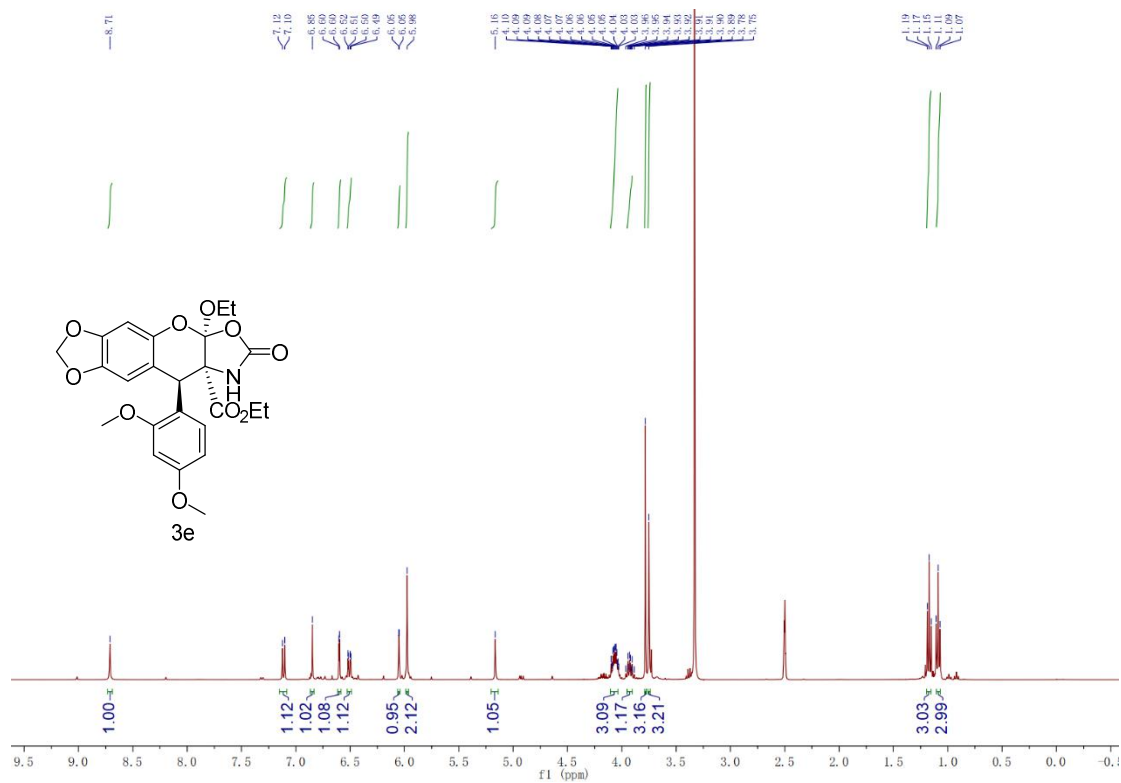

## <sup>13</sup>C NMR Spectrum of Compound 3e (151 MHz, DMSO-d<sub>6</sub>)

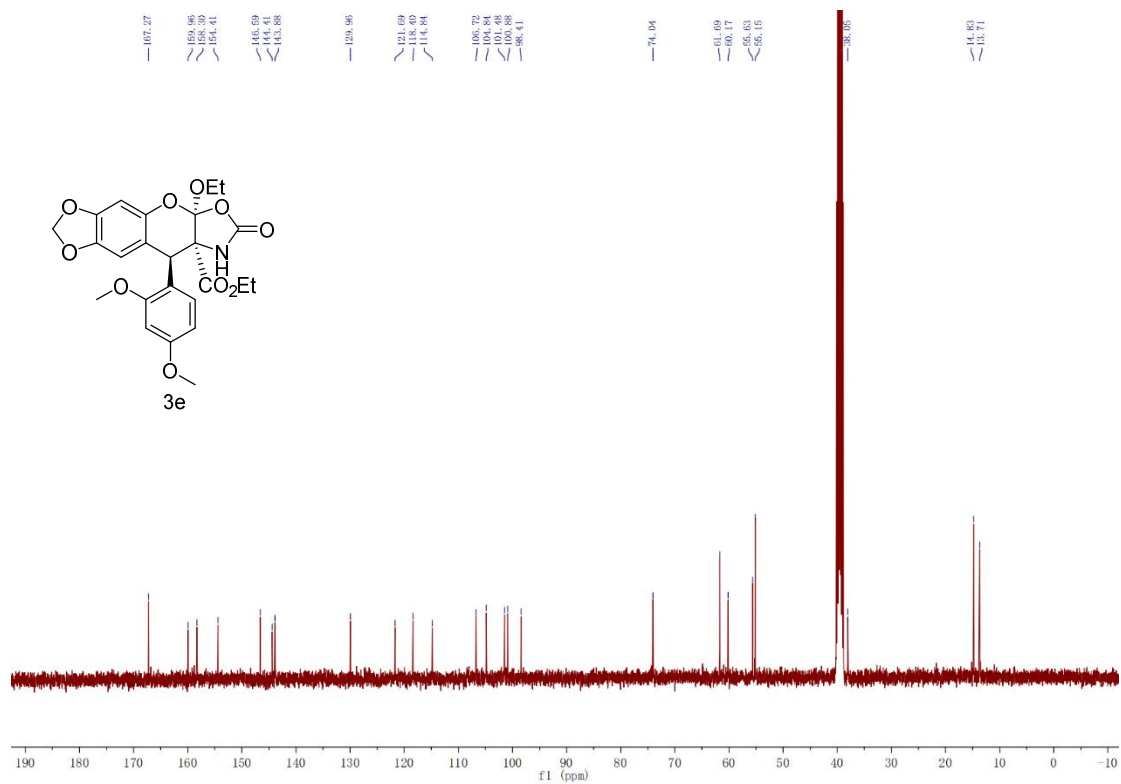

# SUPPORTING INFORMATION

## <sup>1</sup>H NMR Spectrum of Compound 3f (400 MHz, DMSO-d<sub>6</sub>)

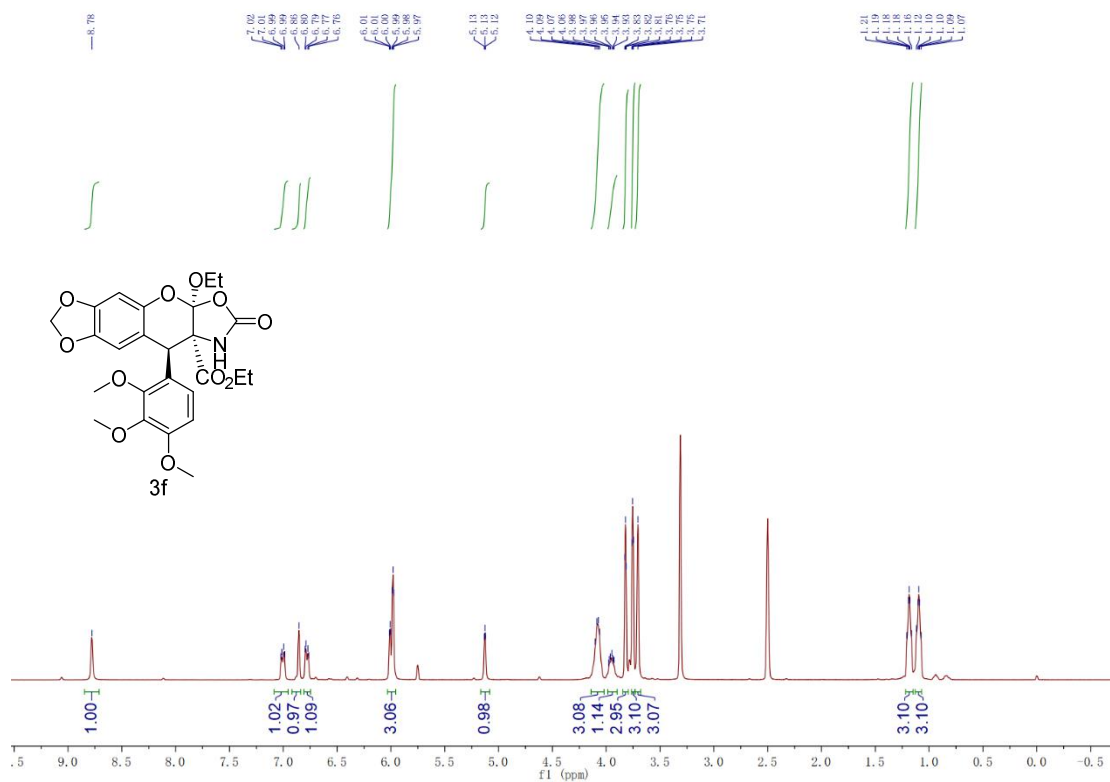

## <sup>13</sup>C NMR Spectrum of Compound 3f (151 MHz, DMSO-d<sub>6</sub>)

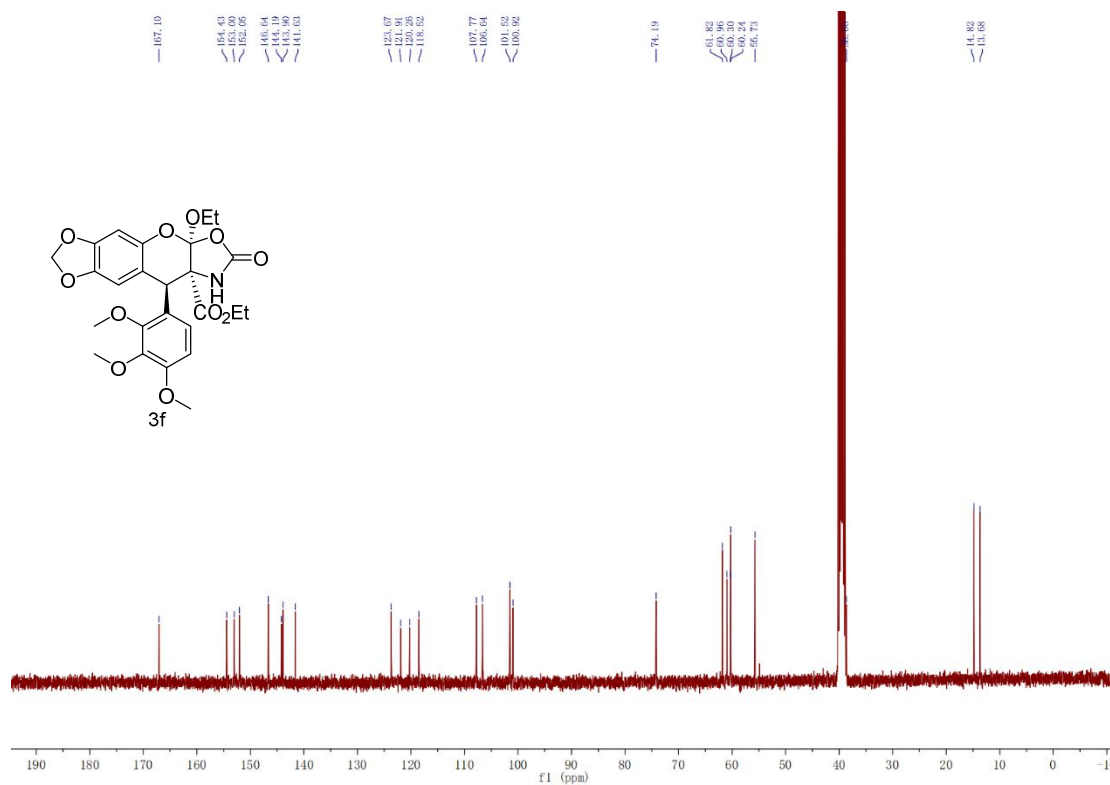

**<sup>1</sup>H NMR Spectrum of Compound 3g (400 MHz, DMSO-*d*<sub>6</sub>)**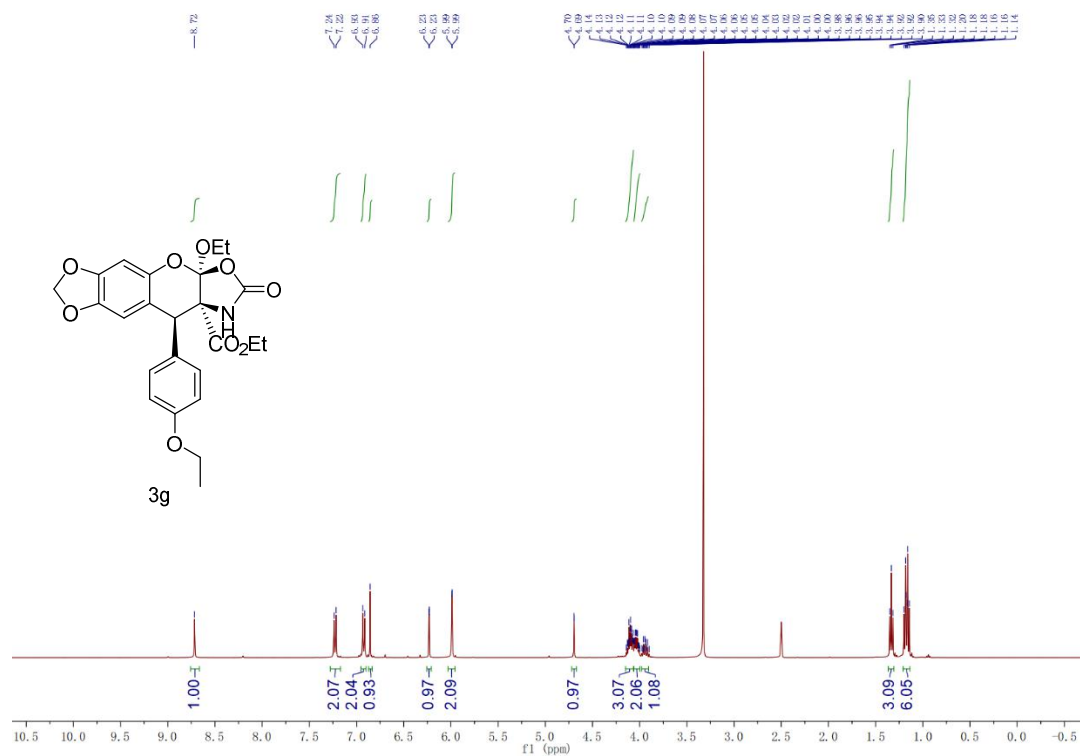**<sup>13</sup>C NMR Spectrum of Compound 3g (151 MHz, DMSO-*d*<sub>6</sub>)**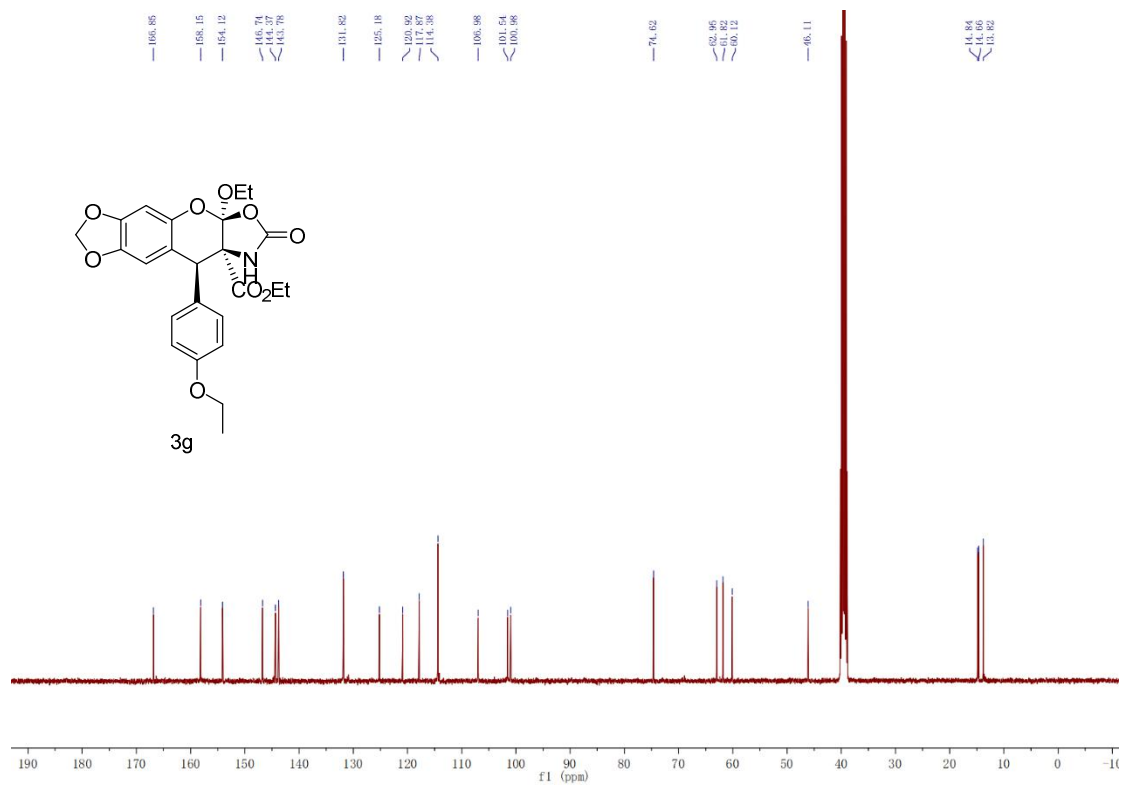

# SUPPORTING INFORMATION

## <sup>1</sup>H NMR Spectrum of Compound 3h (400 MHz, DMSO-d<sub>6</sub>)

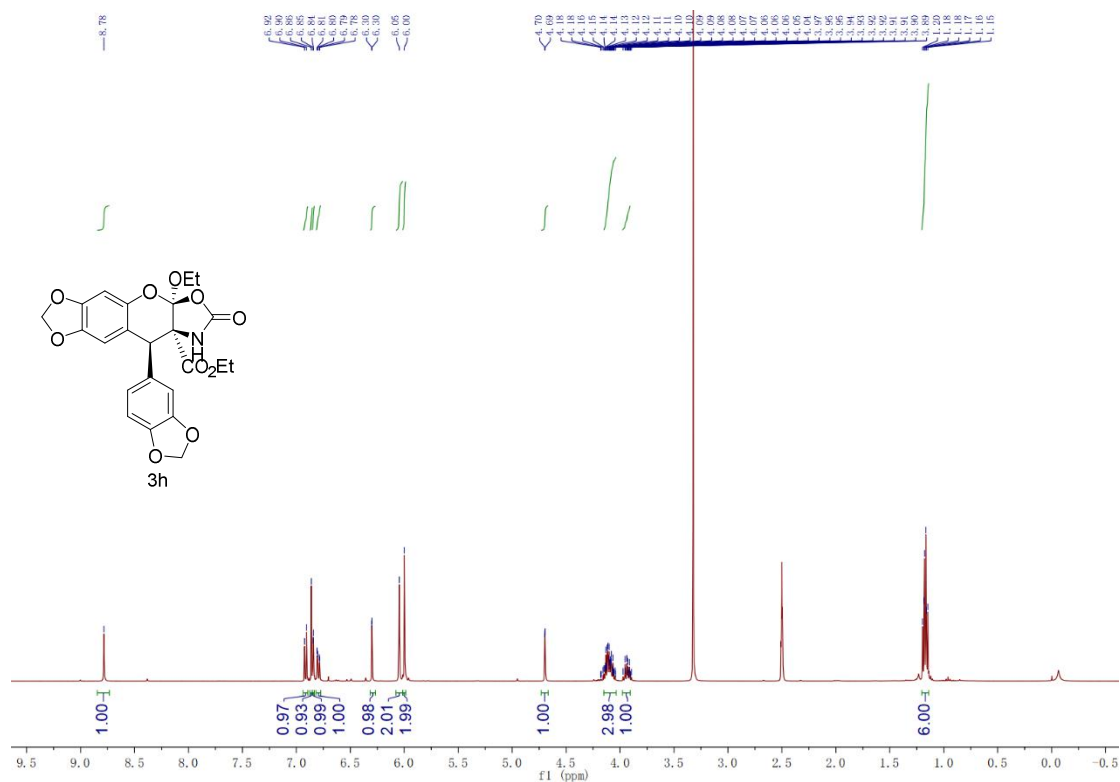

## <sup>13</sup>C NMR Spectrum of Compound 3h (151 MHz, DMSO-d<sub>6</sub>)

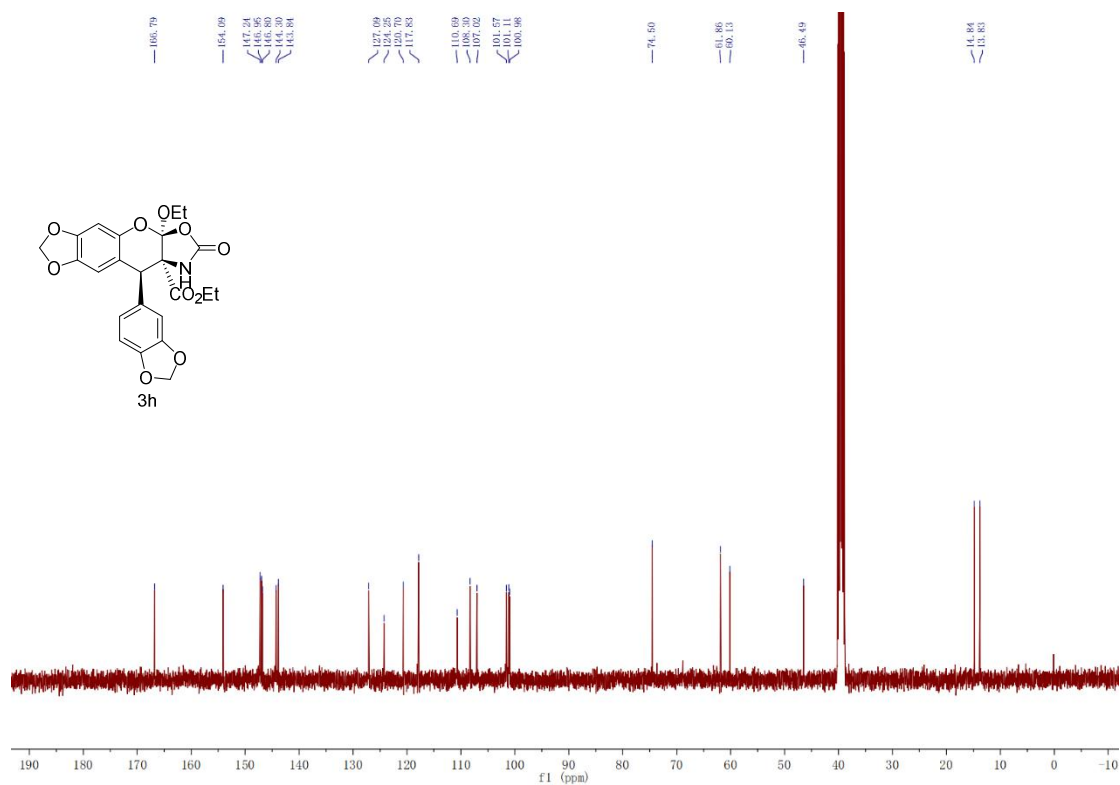

# SUPPORTING INFORMATION

## <sup>1</sup>H NMR Spectrum of Compound 3i (400 MHz, DMSO-d<sub>6</sub>)

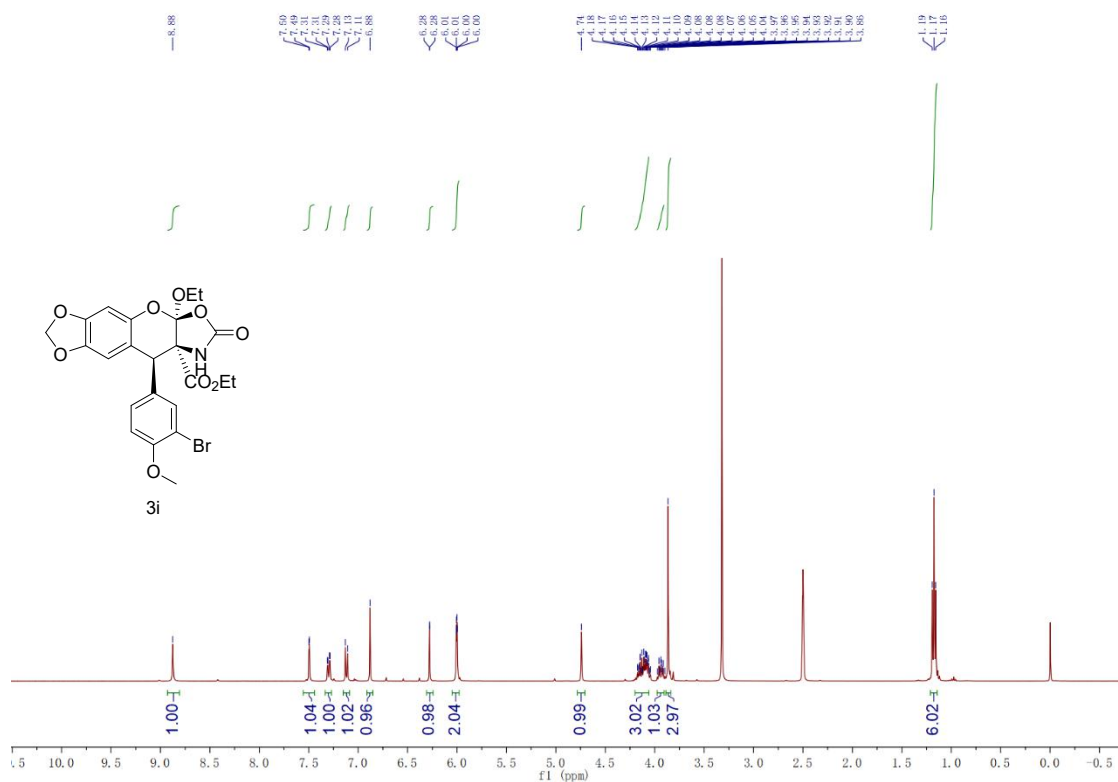

## <sup>13</sup>C NMR Spectrum of Compound 3i (151 MHz, DMSO-d<sub>6</sub>)

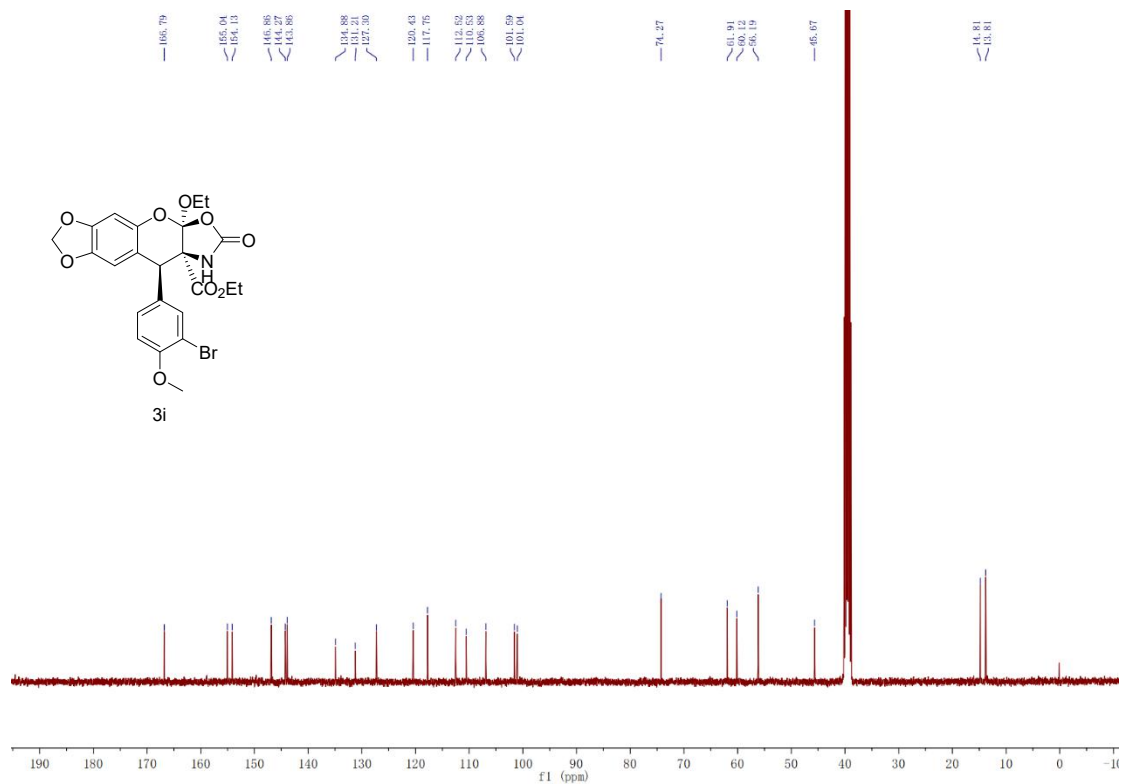

# SUPPORTING INFORMATION

## <sup>1</sup>H NMR Spectrum of Compound 6a (400 MHz, DMSO-d<sub>6</sub>)

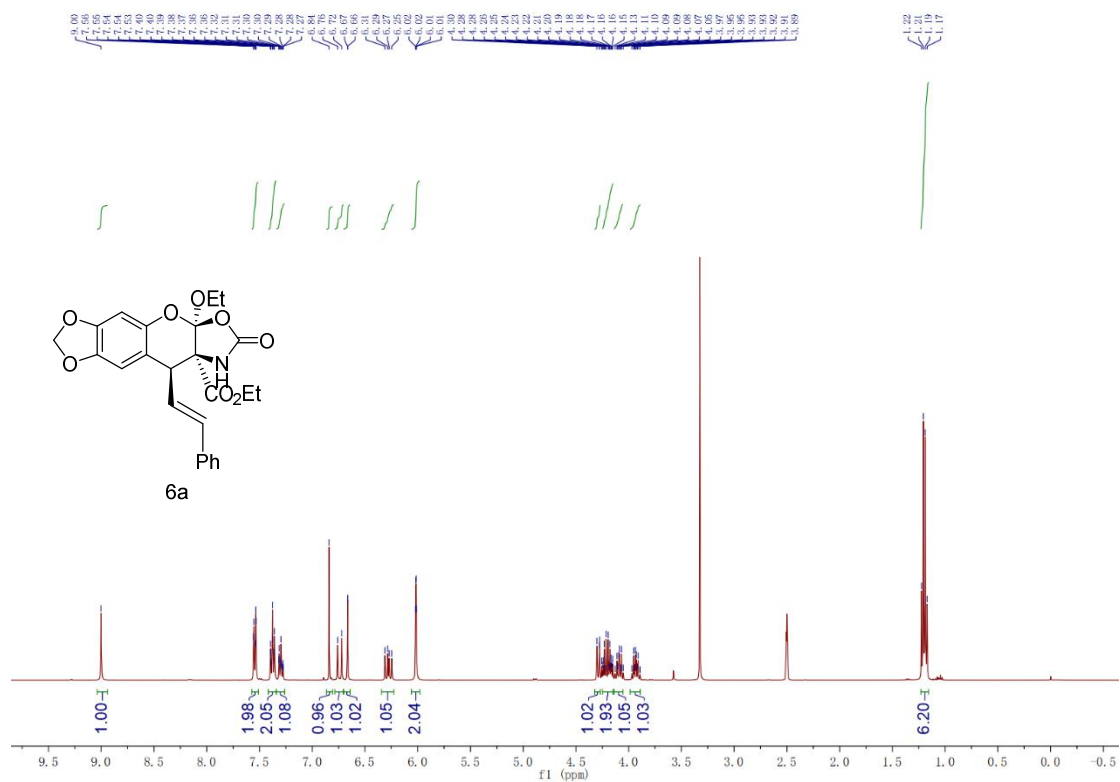

## <sup>13</sup>C NMR Spectrum of Compound 6a (151 MHz, DMSO-d<sub>6</sub>)

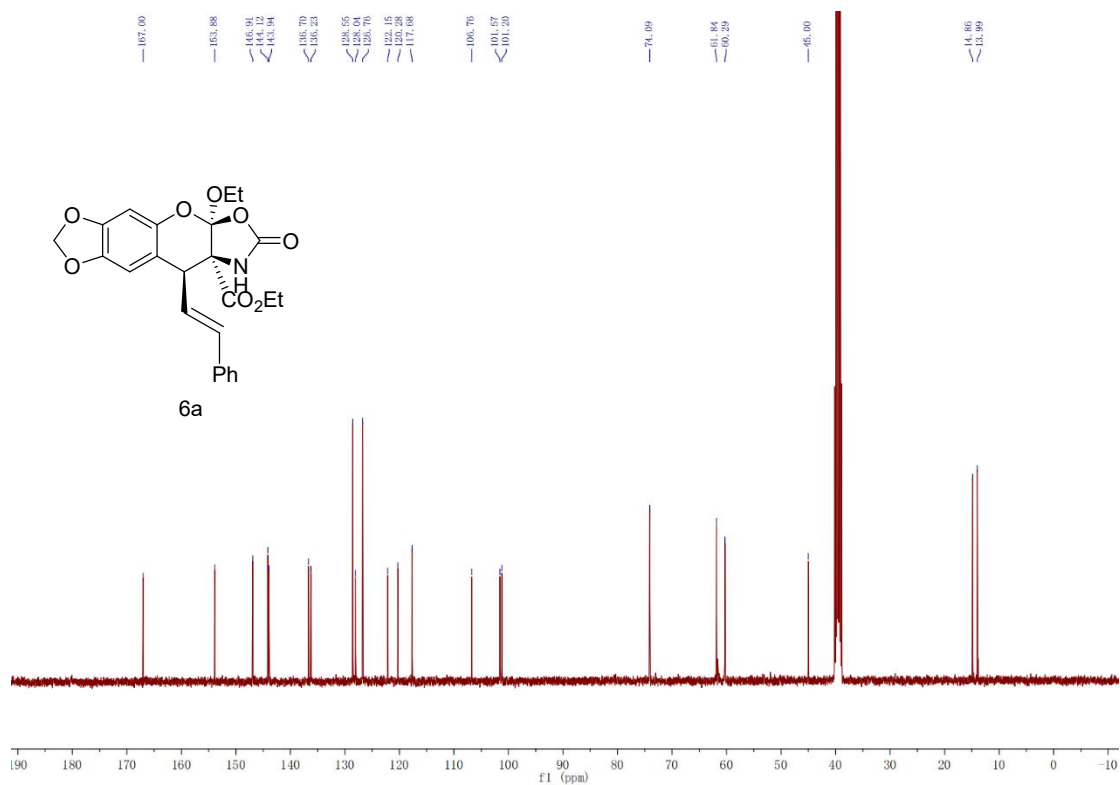

# SUPPORTING INFORMATION

## <sup>1</sup>H NMR Spectrum of Compound 6b (400 MHz, DMSO-d<sub>6</sub>)

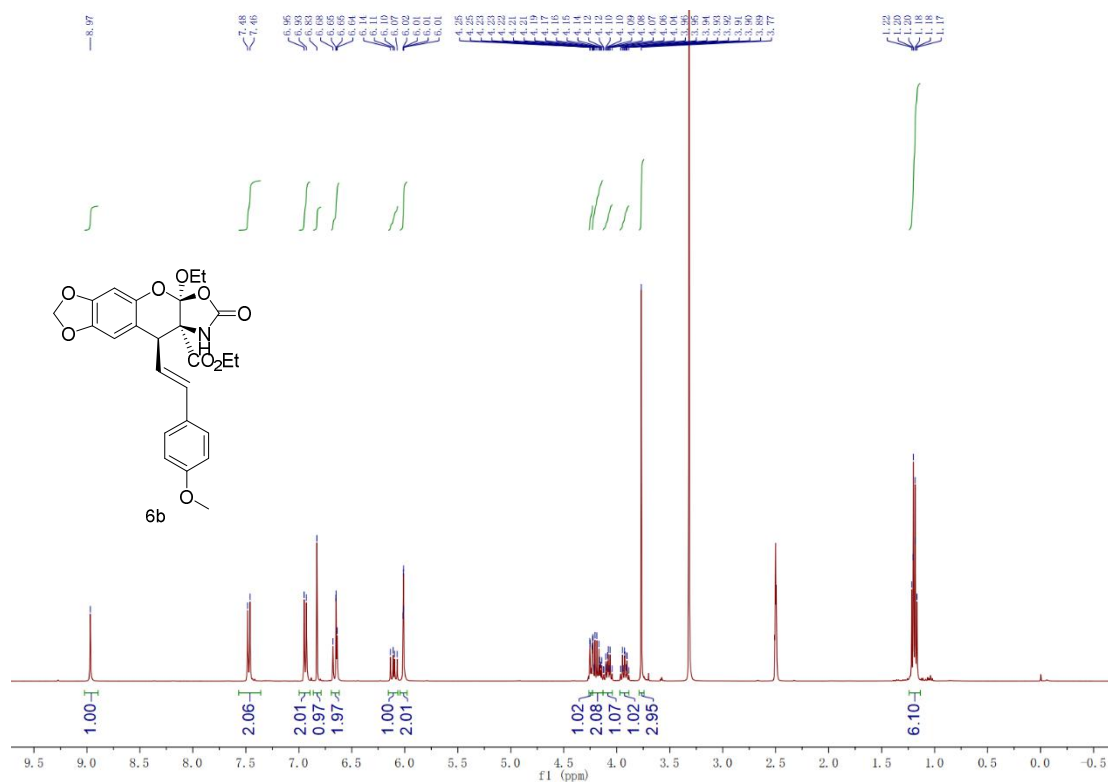

## <sup>13</sup>C NMR Spectrum of Compound 6b (151 MHz, DMSO-d<sub>6</sub>)

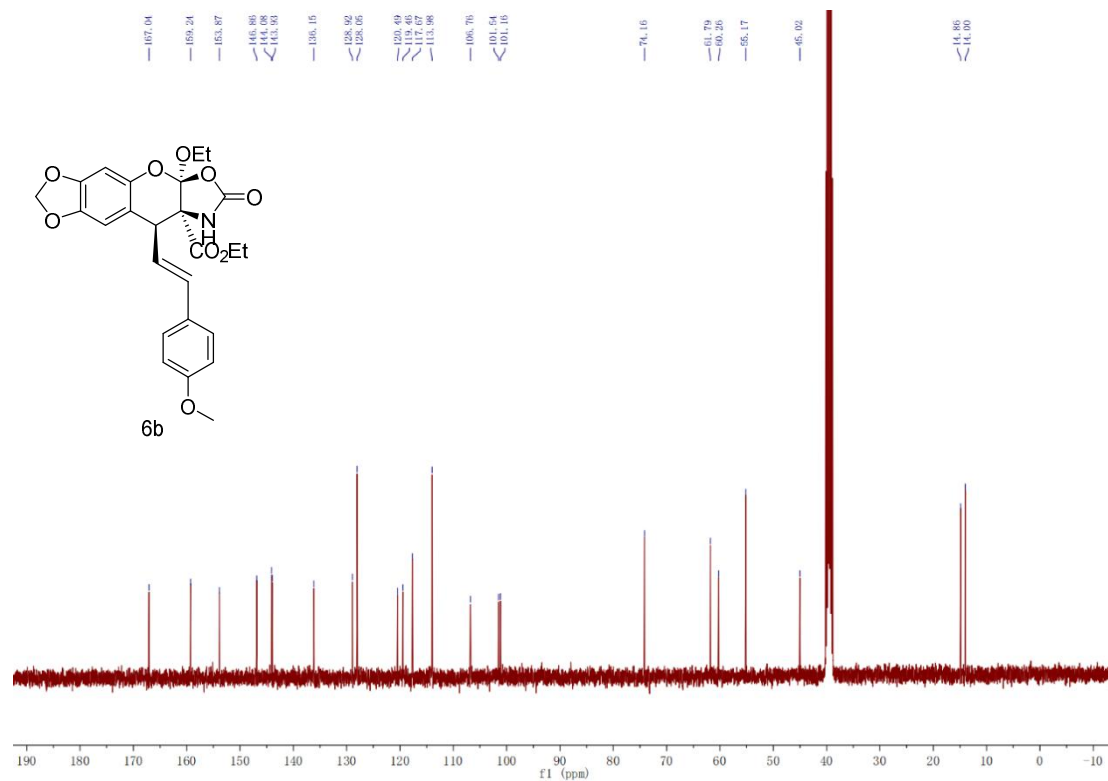

# SUPPORTING INFORMATION

## <sup>1</sup>H NMR Spectrum of Compound 6c (400 MHz, DMSO-d<sub>6</sub>)

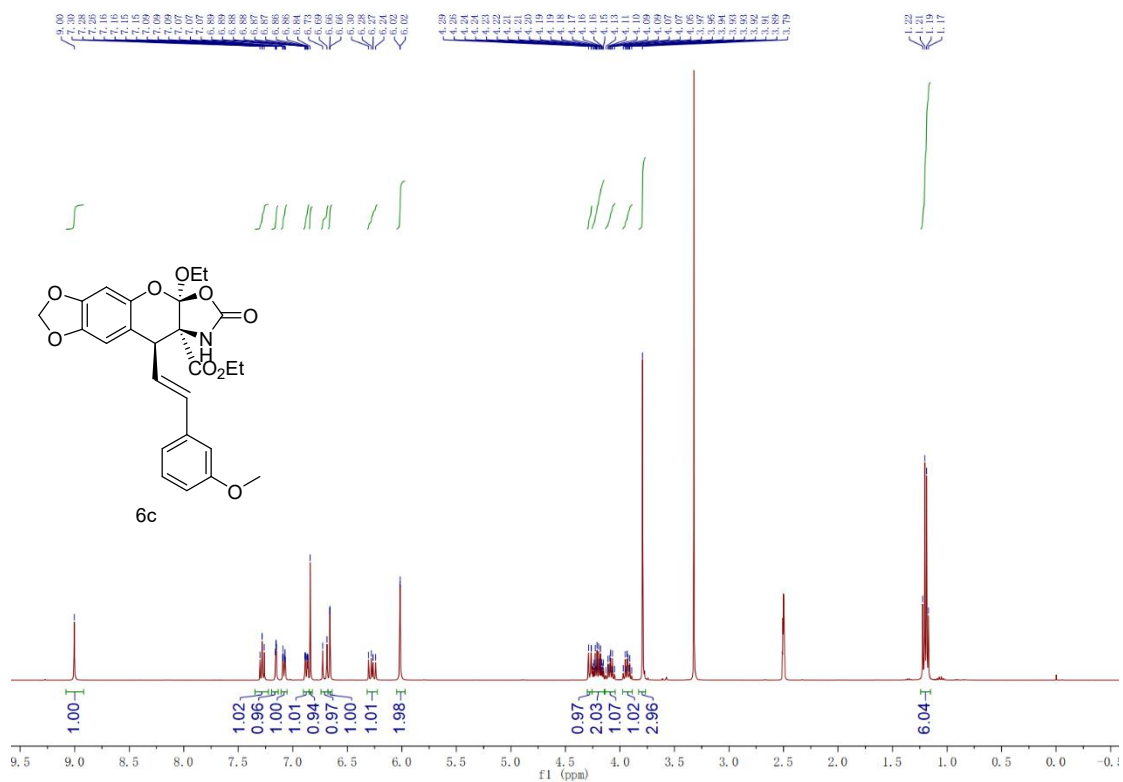

## <sup>13</sup>C NMR Spectrum of Compound 6c (151 MHz, DMSO-d<sub>6</sub>)

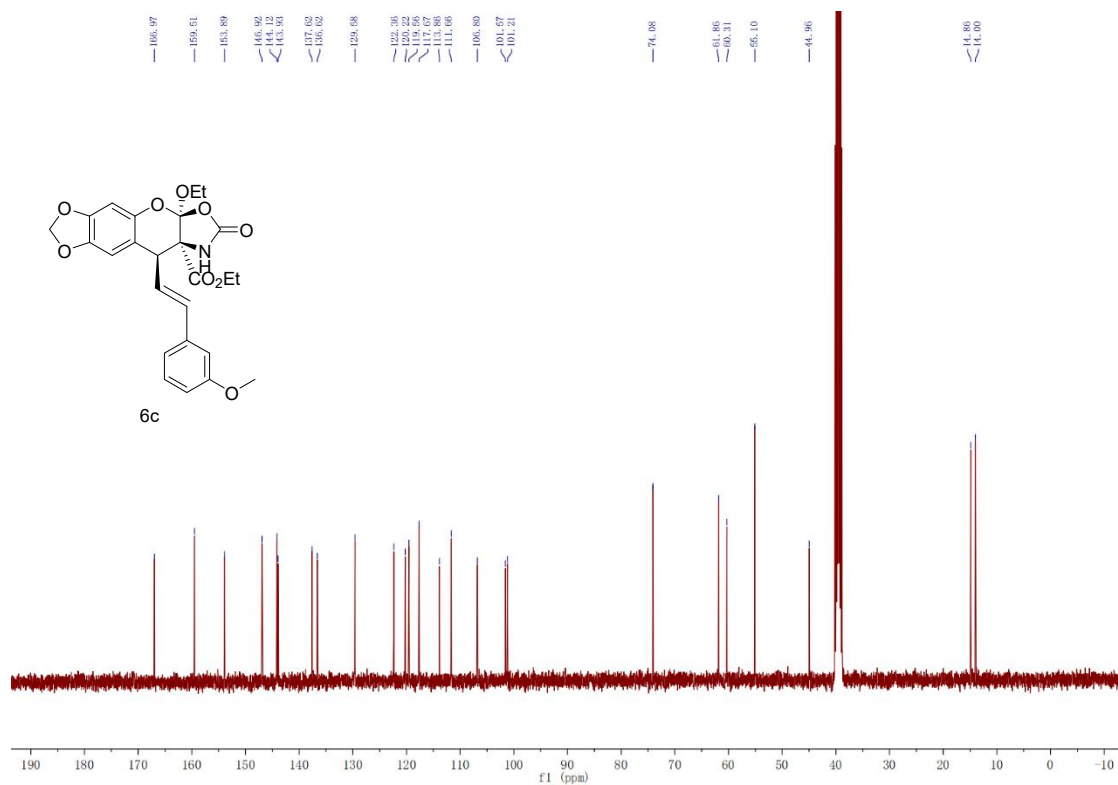





# SUPPORTING INFORMATION

## <sup>1</sup>H NMR Spectrum of Compound 6e (400 MHz, DMSO-d<sub>6</sub>)

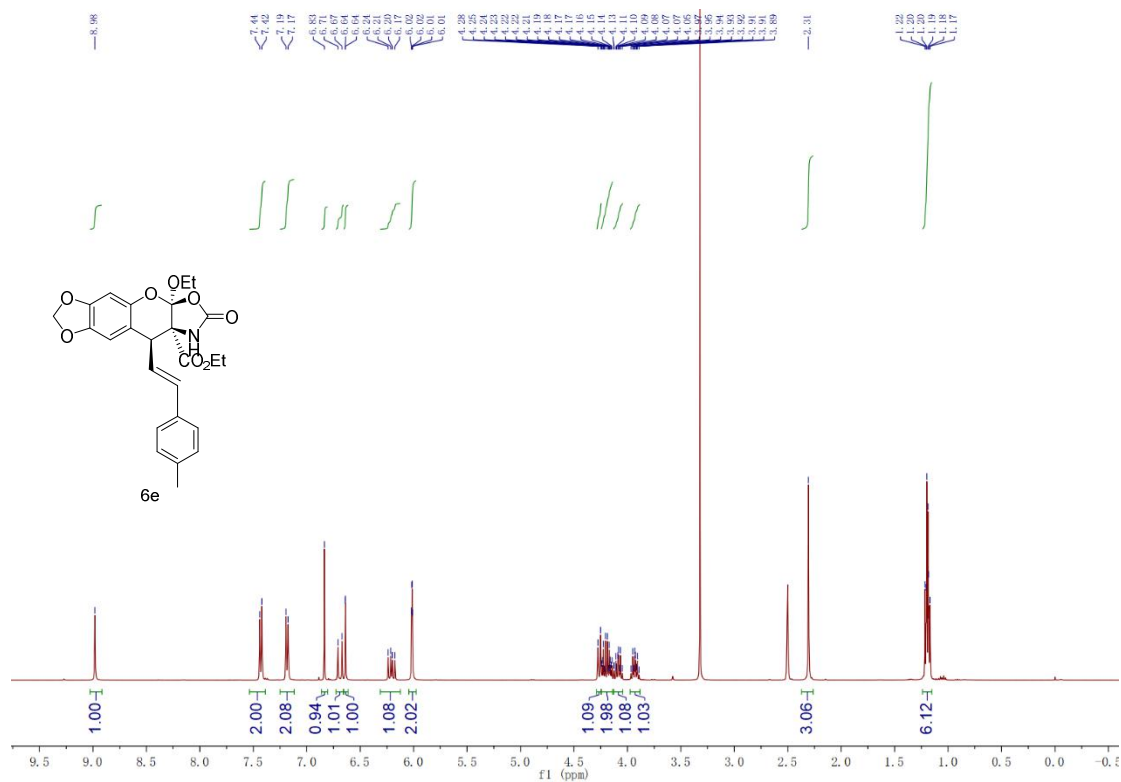

## <sup>13</sup>C NMR Spectrum of Compound 6e (151 MHz, DMSO-d<sub>6</sub>)

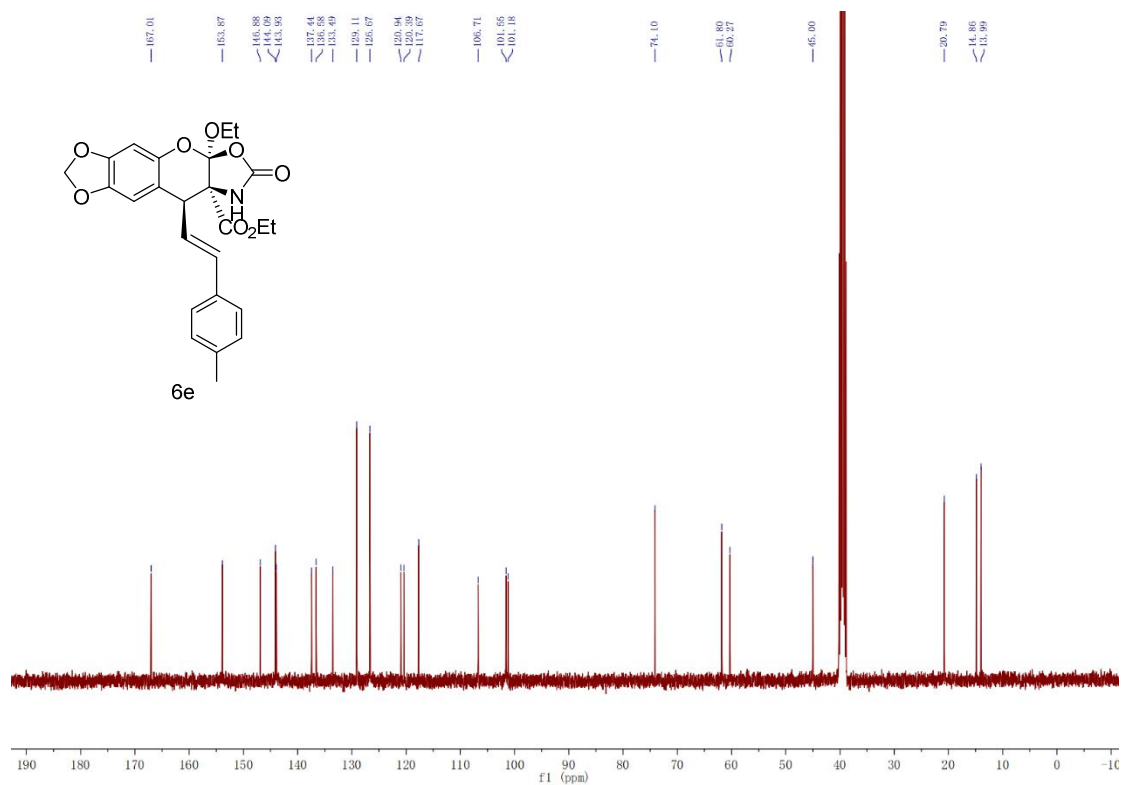

# SUPPORTING INFORMATION

## <sup>1</sup>H NMR Spectrum of Compound 6f (400 MHz, DMSO-d<sub>6</sub>)

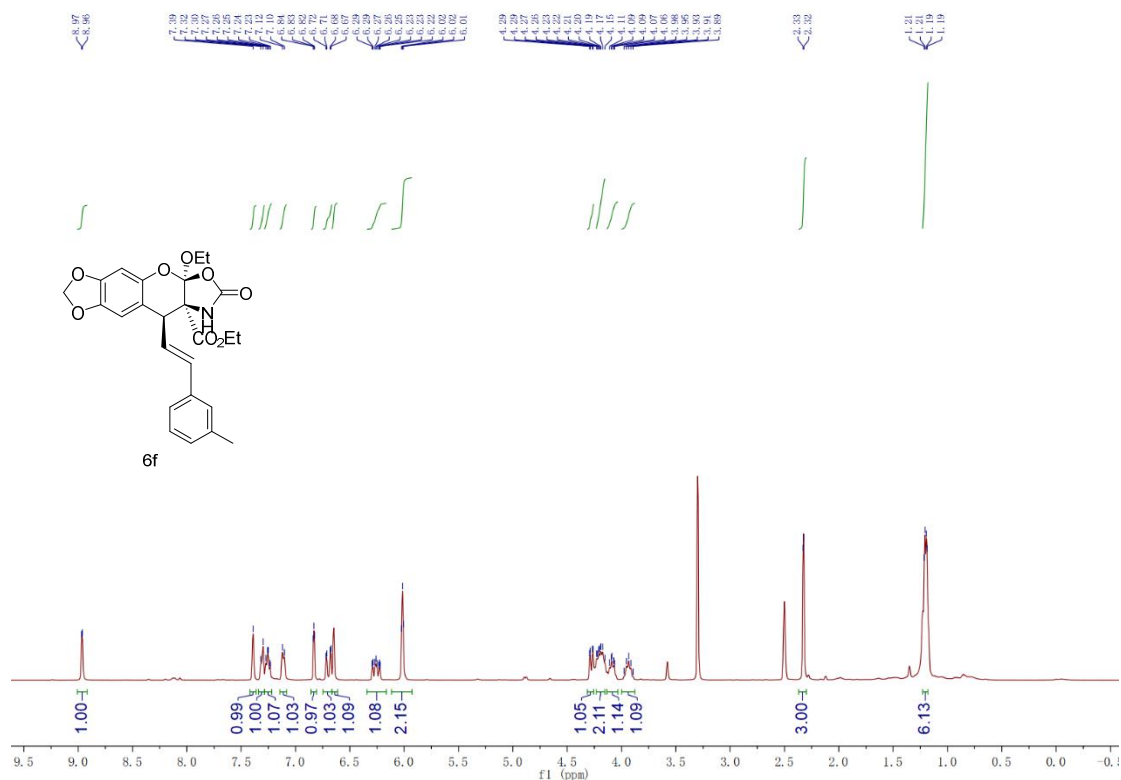

## <sup>13</sup>C NMR Spectrum of Compound 6f (151 MHz, DMSO-d<sub>6</sub>)

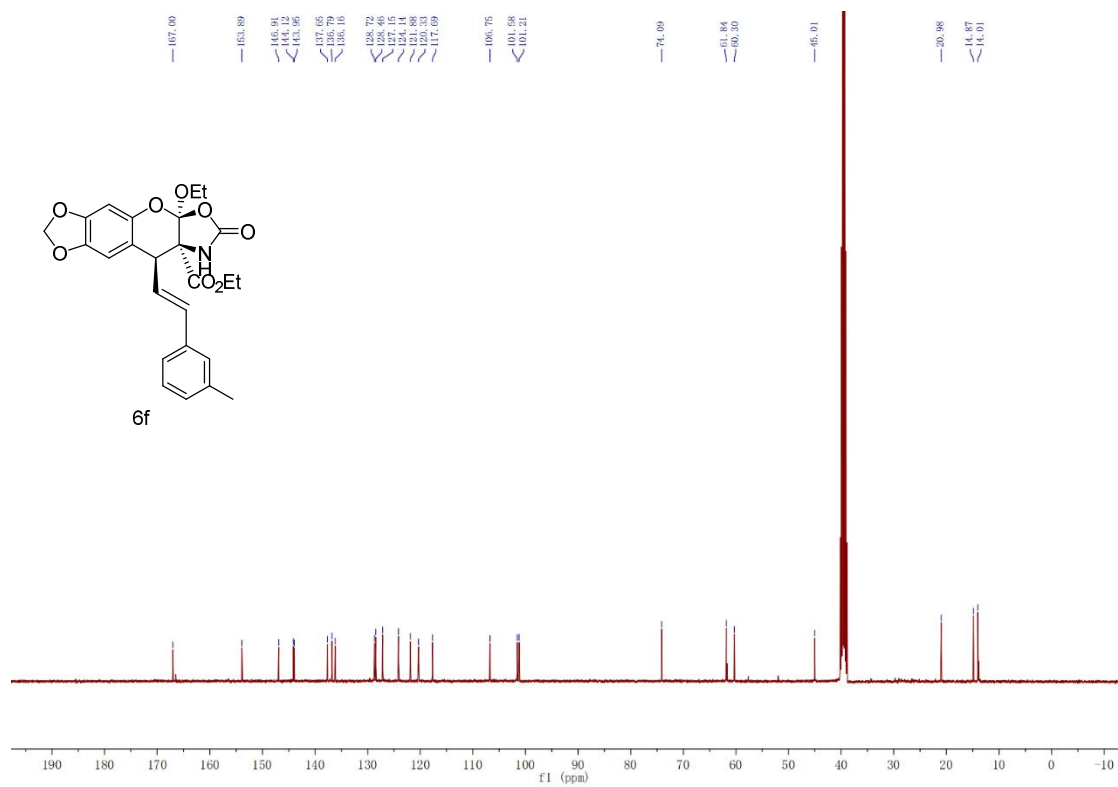

# SUPPORTING INFORMATION

## <sup>1</sup>H NMR Spectrum of Compound 6g (400 MHz, DMSO-d<sub>6</sub>)

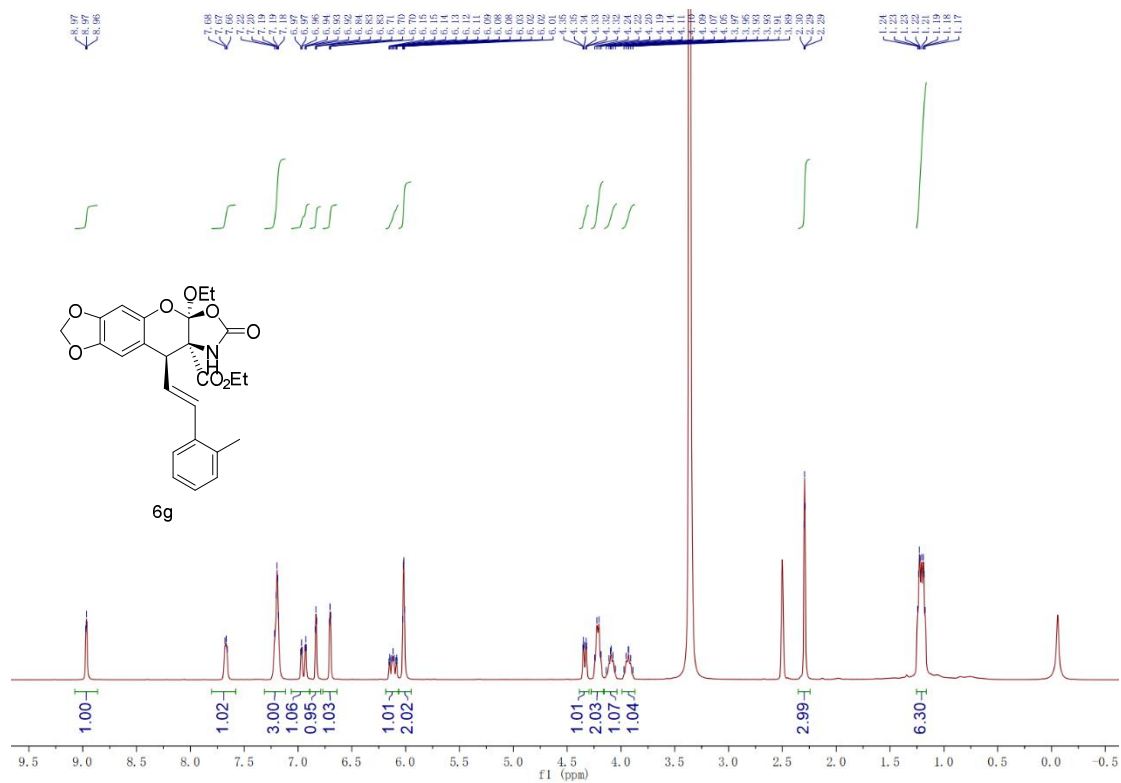

## <sup>13</sup>C NMR Spectrum of Compound 6g (151 MHz, DMSO-d<sub>6</sub>)

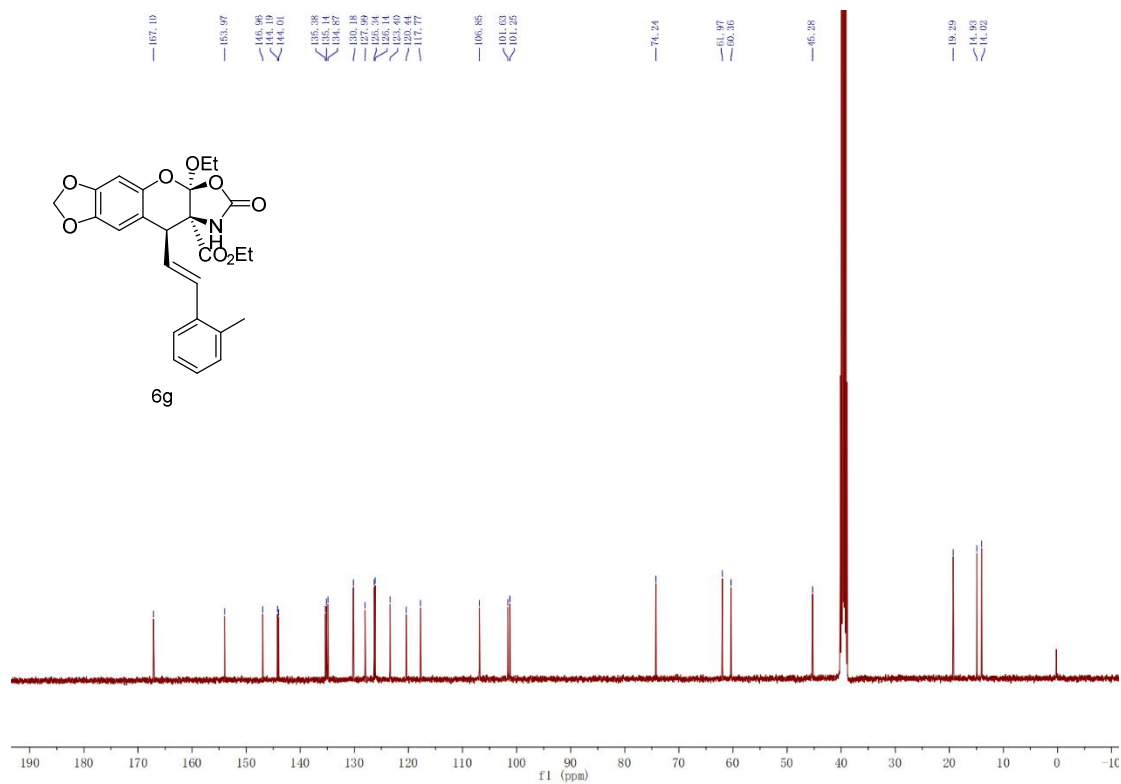

# SUPPORTING INFORMATION

## <sup>1</sup>H NMR Spectrum of Compound 6h (400 MHz, DMSO-d<sub>6</sub>)

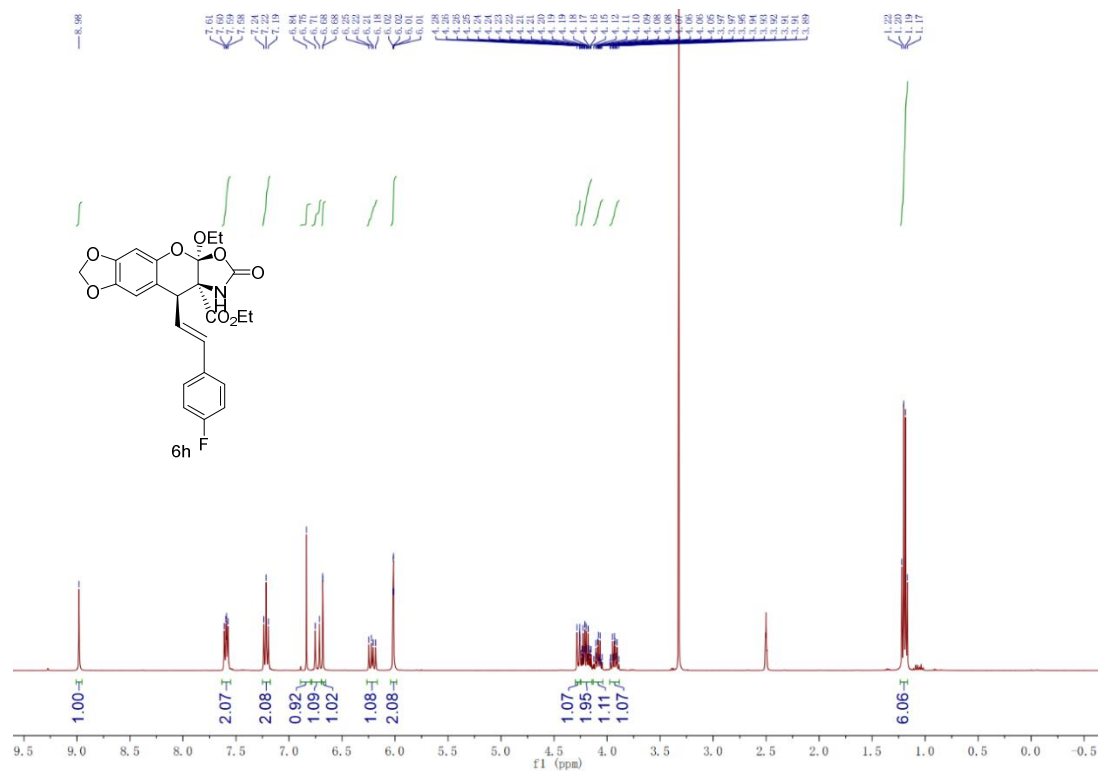

## <sup>13</sup>C NMR Spectrum of Compound 6h (151 MHz, DMSO-d<sub>6</sub>)

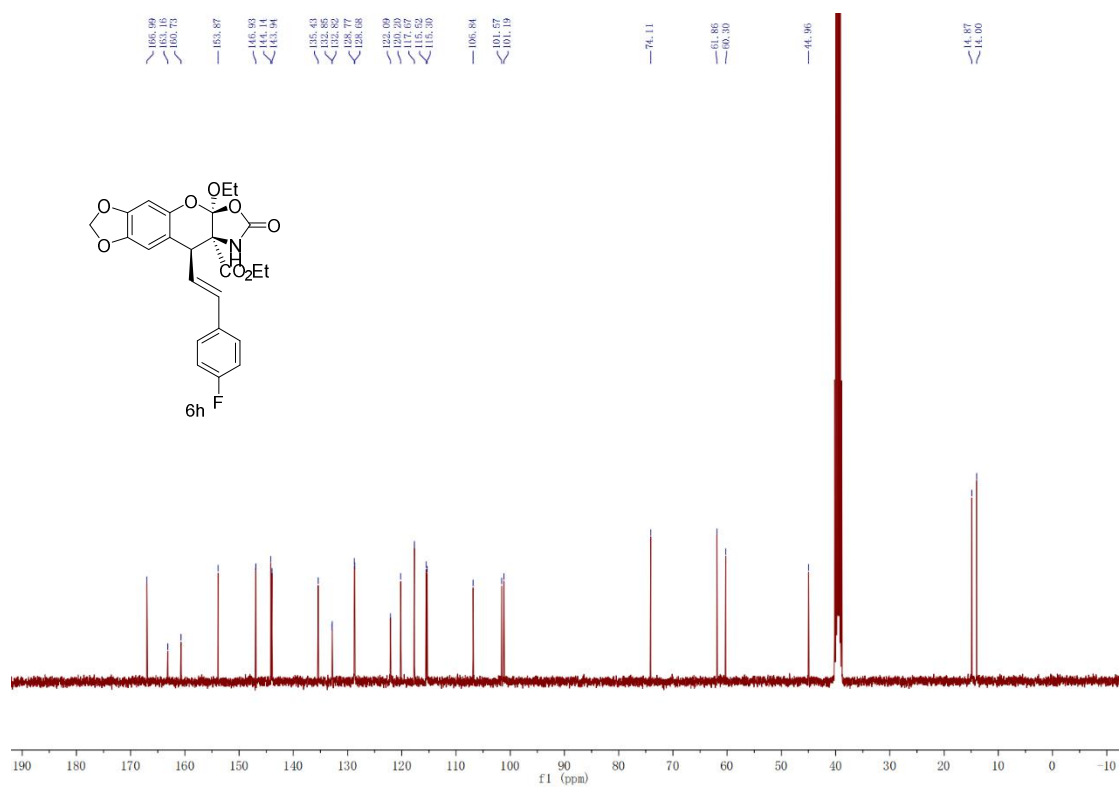

# SUPPORTING INFORMATION

## <sup>19</sup>F NMR Spectrum of Compound 6h (376 MHz, DMSO-*d*<sub>6</sub>)

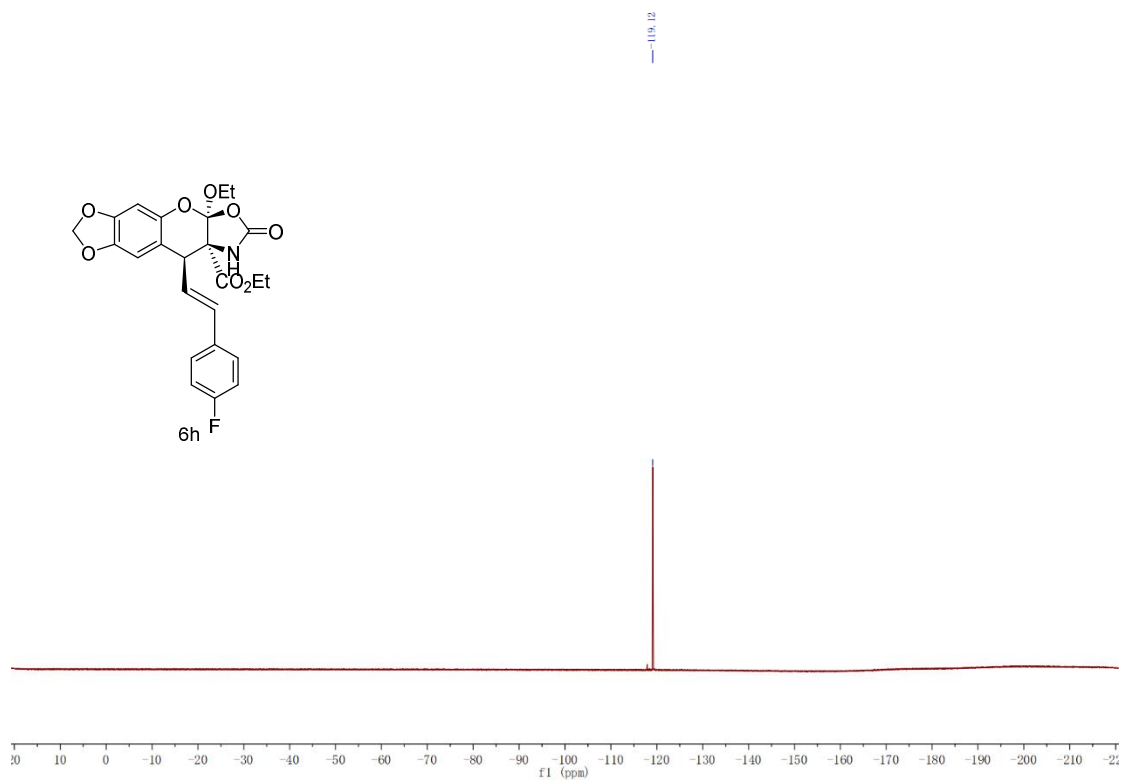

# SUPPORTING INFORMATION

## <sup>1</sup>H NMR Spectrum of Compound 6i (400 MHz, DMSO-d<sub>6</sub>)

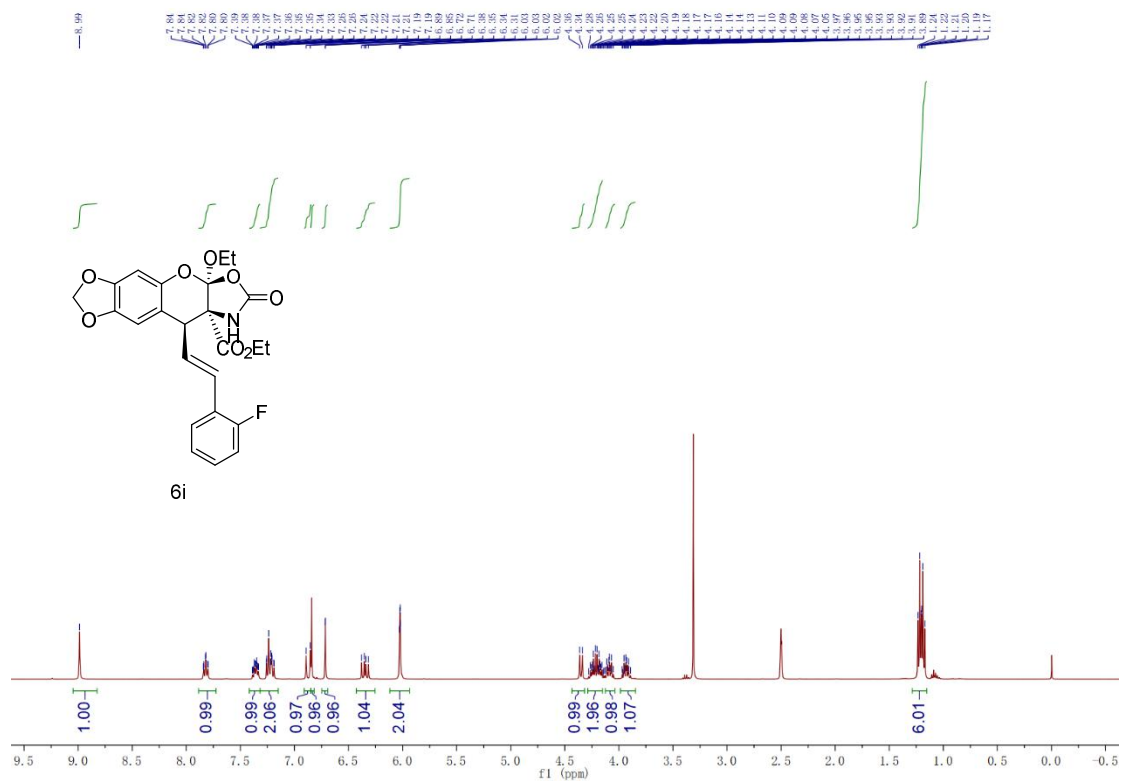

## <sup>13</sup>C NMR Spectrum of Compound 6i (151 MHz, DMSO-d<sub>6</sub>)

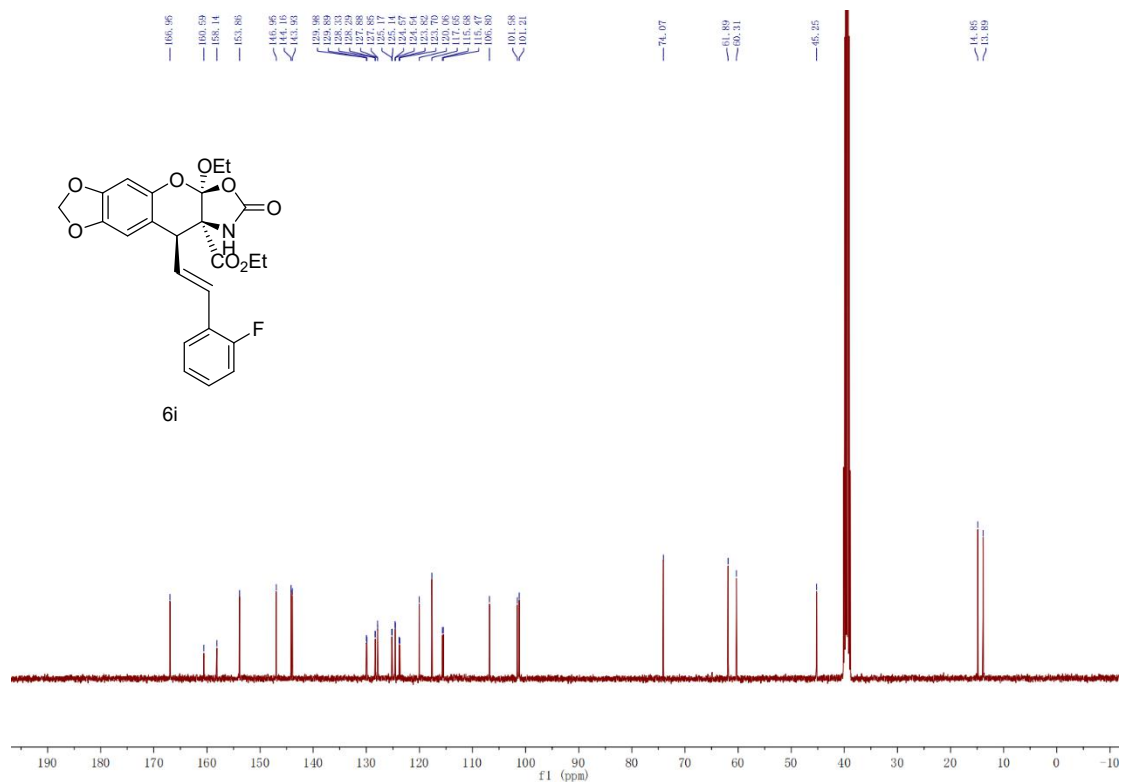

# SUPPORTING INFORMATION

## <sup>19</sup>F NMR Spectrum of Compound 6i (376 MHz, DMSO-*d*<sub>6</sub>)

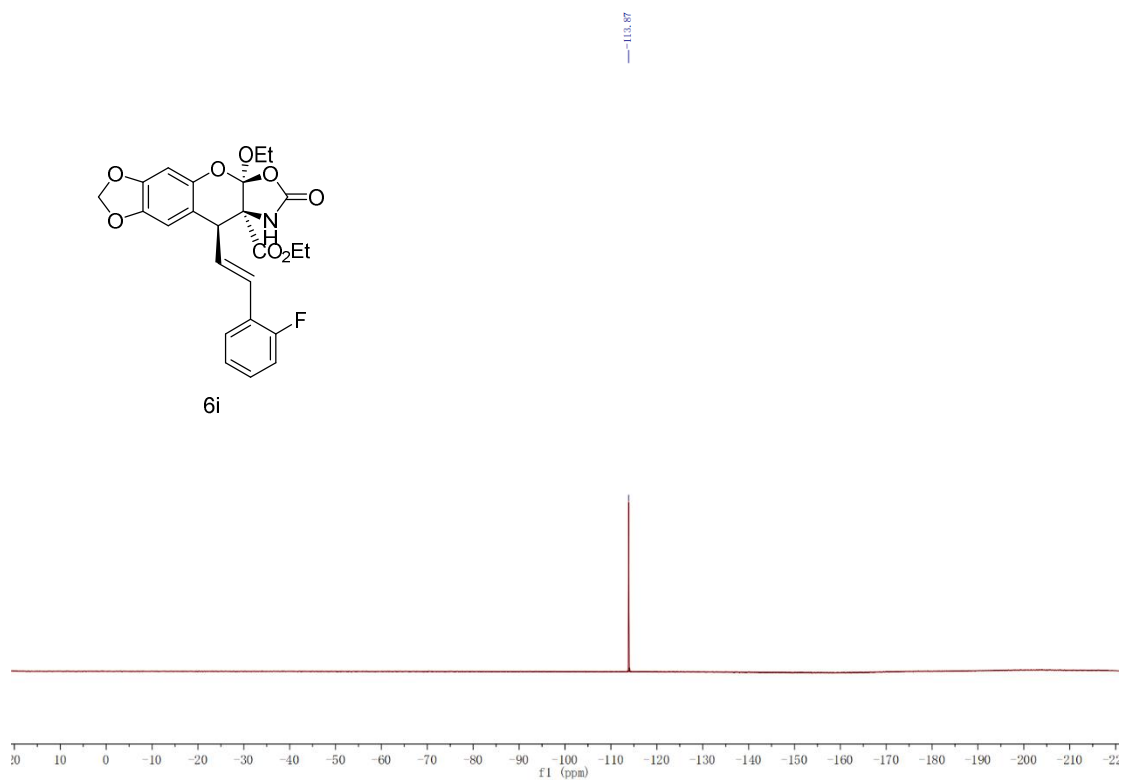



# SUPPORTING INFORMATION

## <sup>1</sup>H NMR Spectrum of Compound 6j (400 MHz, DMSO-d<sub>6</sub>)

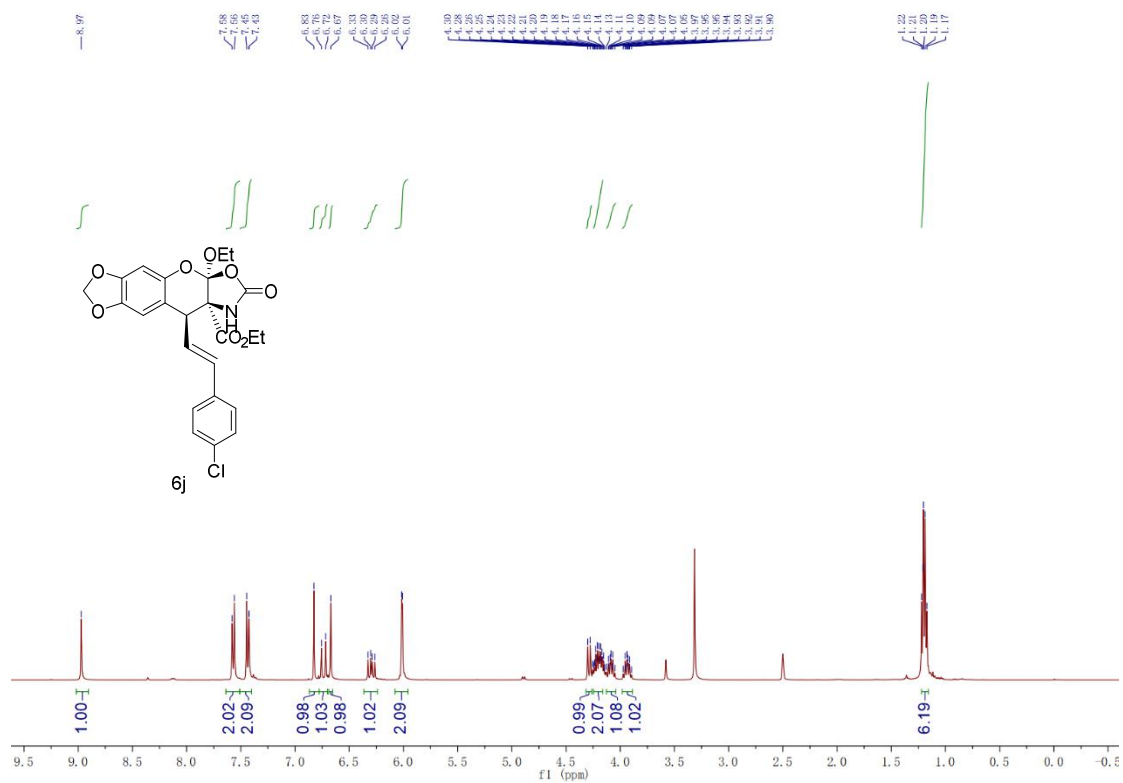

## <sup>13</sup>C NMR Spectrum of Compound 6j (151 MHz, DMSO-d<sub>6</sub>)

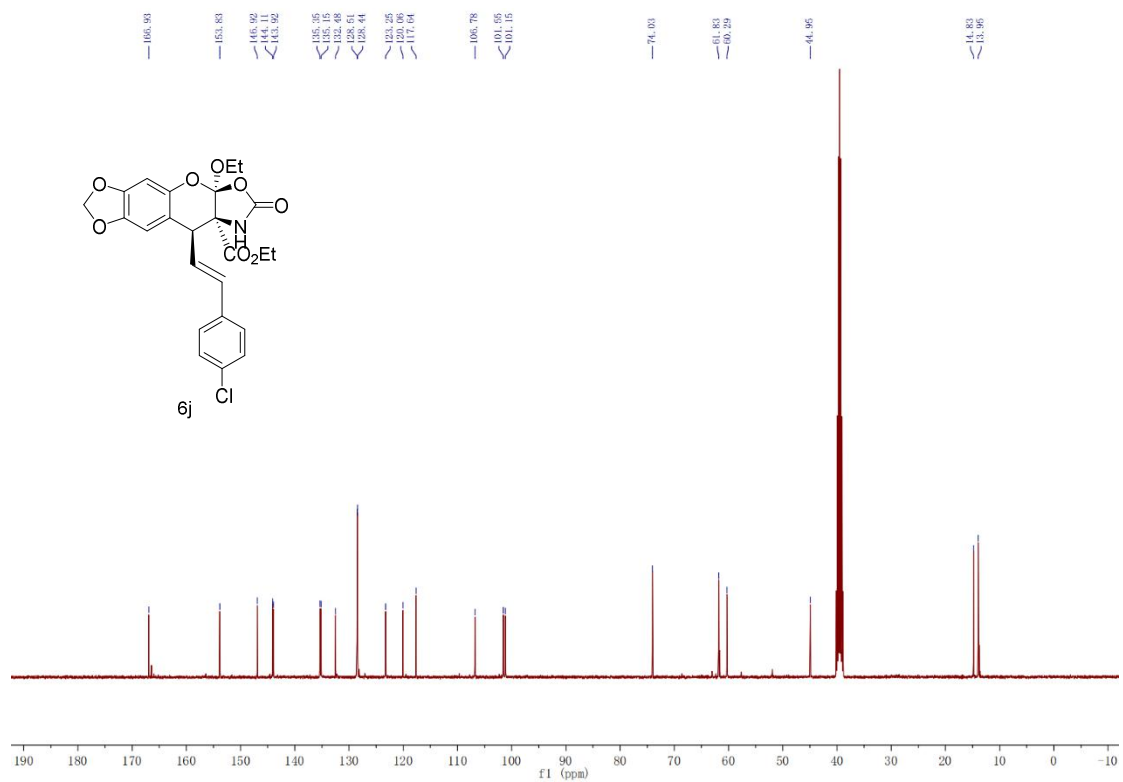

# SUPPORTING INFORMATION

**<sup>1</sup>H NMR Spectrum of Compound 6k (400 MHz, DMSO-*d*<sub>6</sub>)**

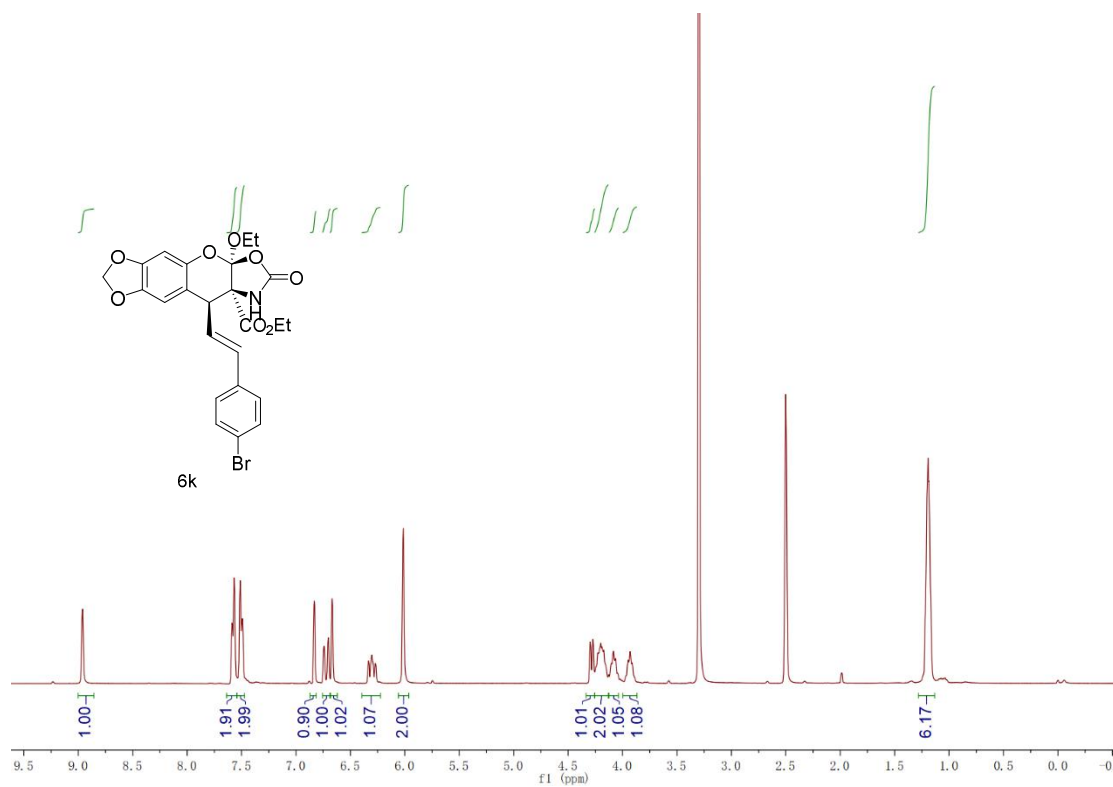

**<sup>13</sup>C NMR Spectrum of Compound 6k (151 MHz, DMSO-*d*<sub>6</sub>)**

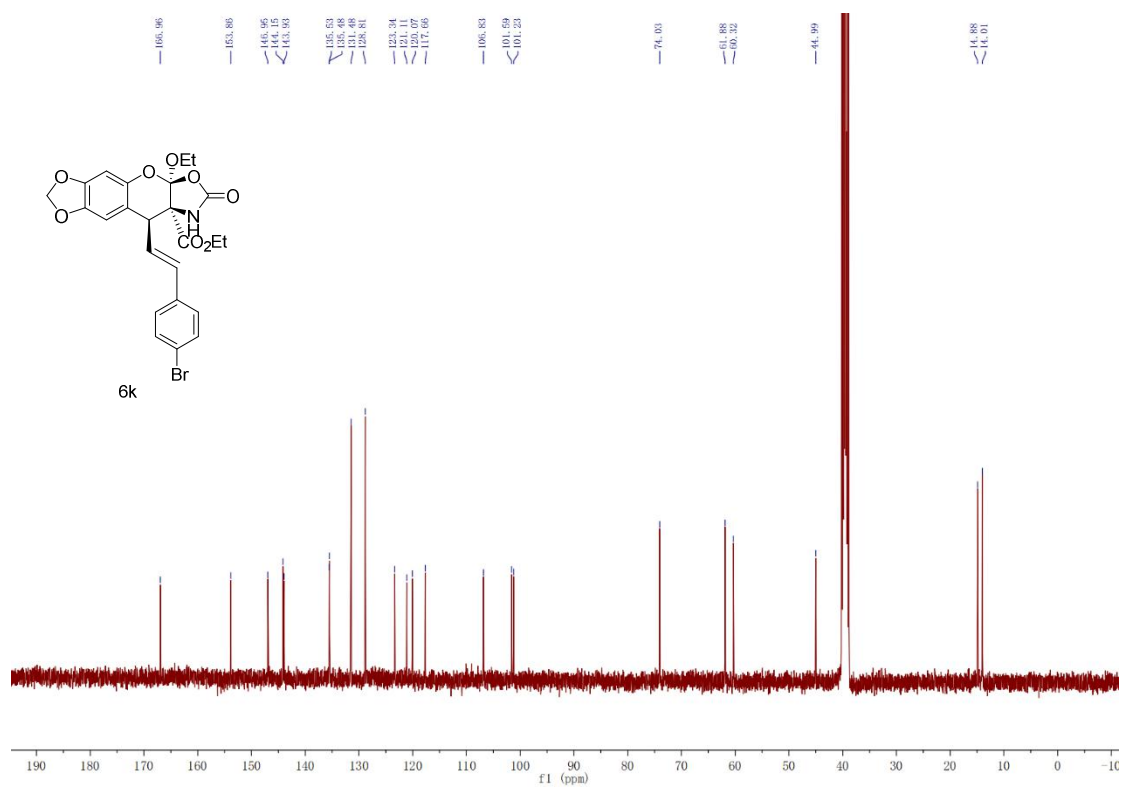

# SUPPORTING INFORMATION

## <sup>1</sup>H NMR Spectrum of Compound 6l (400 MHz, DMSO-d<sub>6</sub>)

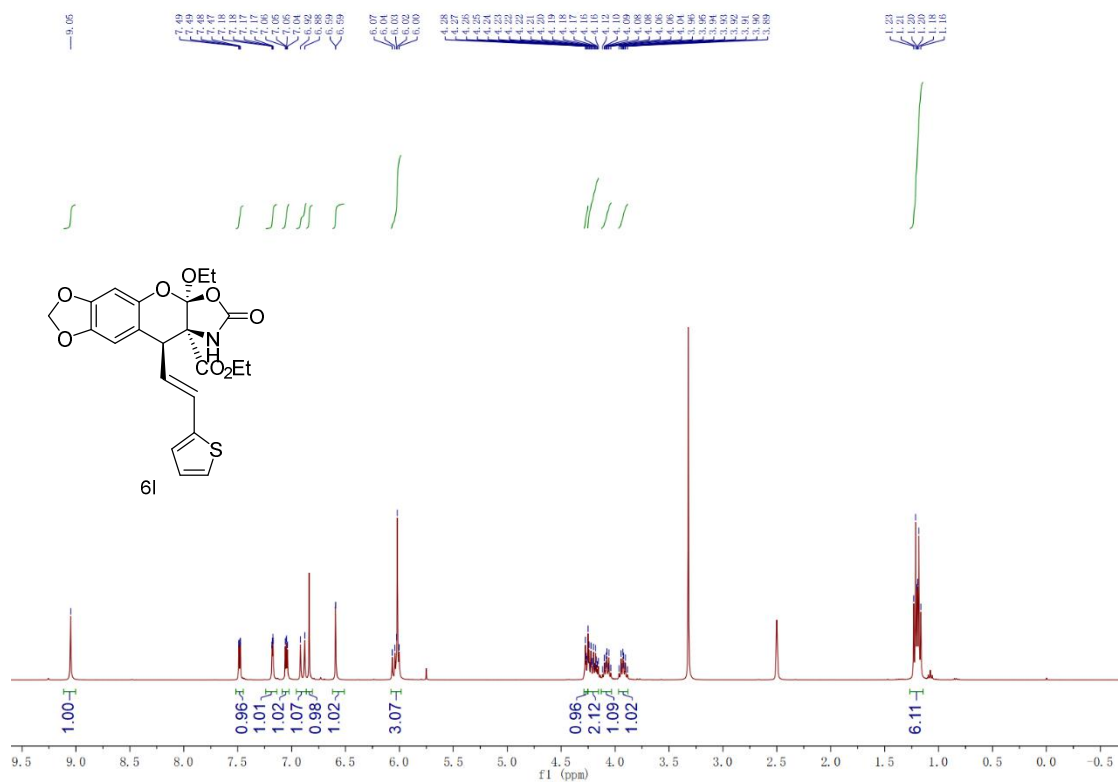

## <sup>13</sup>C NMR Spectrum of Compound 6l (151 MHz, DMSO-d<sub>6</sub>)

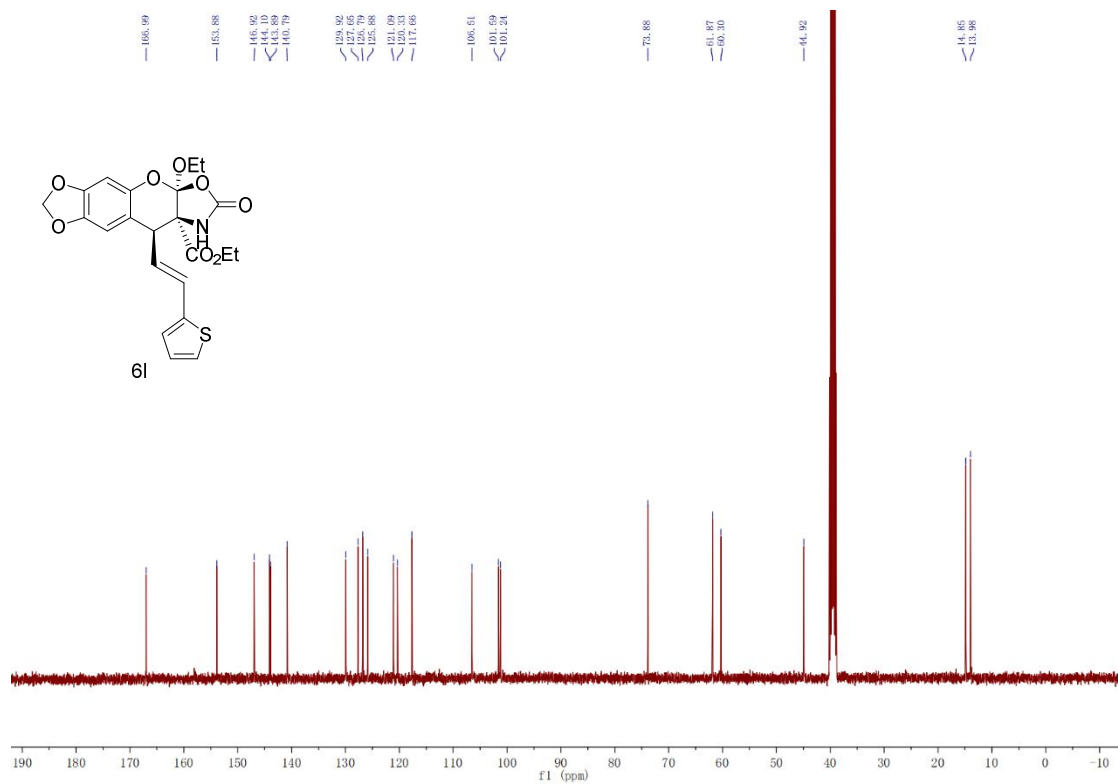



## 5. HPLC Spectra

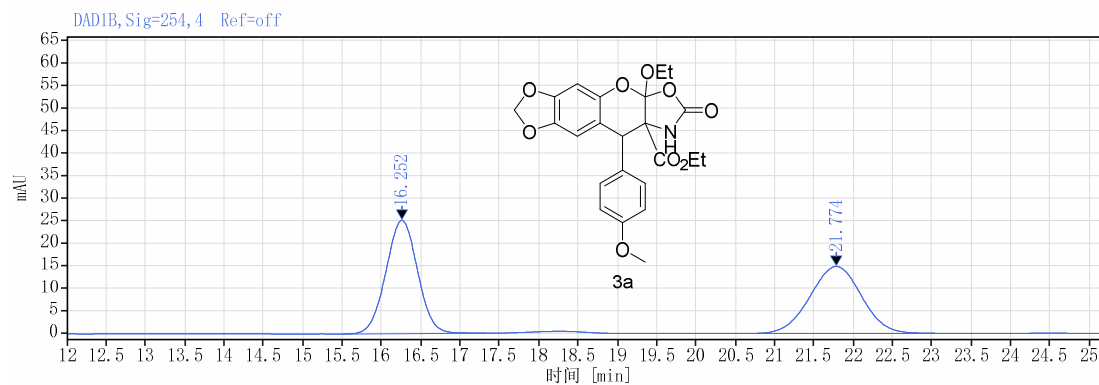

| RetTime [min] | Type | Wide [min] | Area[mAu*s] | Height[mAu] | Area% |
|---------------|------|------------|-------------|-------------|-------|
| 16.252        | BB   | 1.82       | 703.64      | 25.19       | 50.83 |
| 21.774        | BB   | 3.07       | 680.72      | 14.91       | 49.17 |
| Total         |      |            | 1384.36     |             |       |

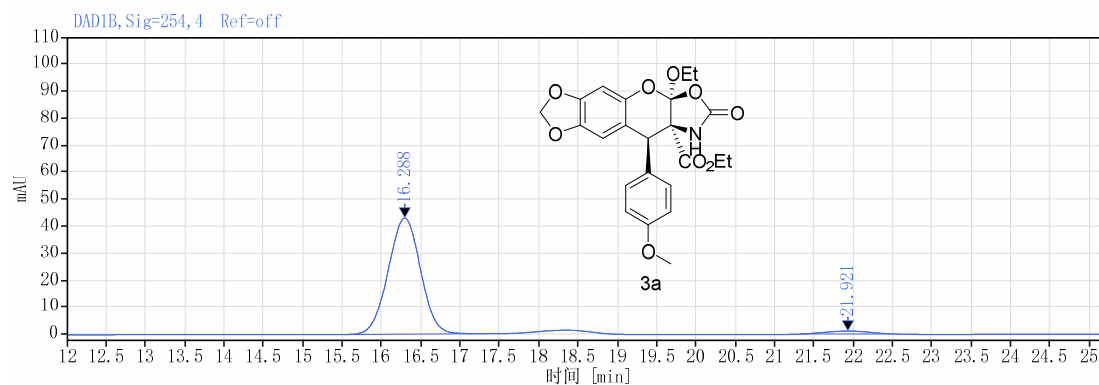

| RetTime [min] | Type | Wide [min] | Area[mAu*s] | Height[mAu] | Area% |
|---------------|------|------------|-------------|-------------|-------|
| 16.288        | BB   | 1.83       | 1227.73     | 43.02       | 96.82 |
| 21.921        | MM m | 0.57       | 40.38       | 1.06        | 3.18  |
| Total         |      |            | 1268.11     |             |       |

# SUPPORTING INFORMATION

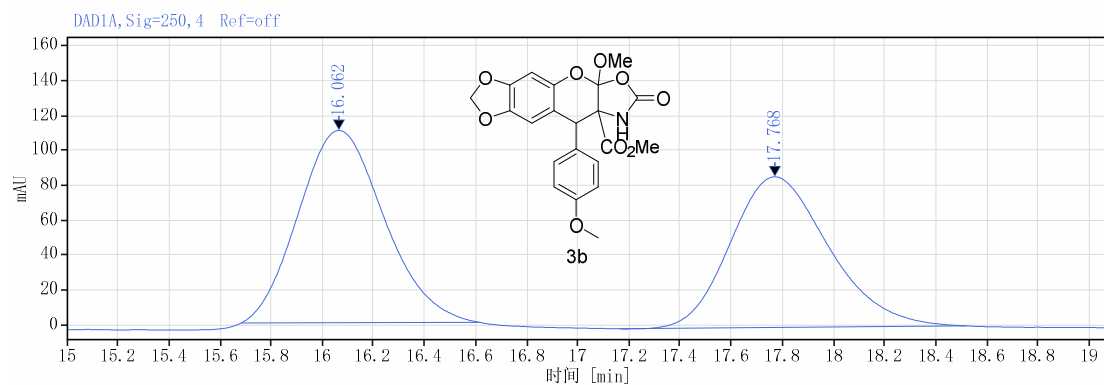

| RetTime [min] | Type | Wide [min] | Area[mAu*s] | Height[mAu] | Area% |
|---------------|------|------------|-------------|-------------|-------|
| 16.062        | MM   | 0.36       | 2577.28     | 110.39      | 52.70 |
| 17.768        | MM   | 0.41       | 2312.77     | 86.51       | 47.30 |
| Total         |      |            | 4890.05     |             |       |

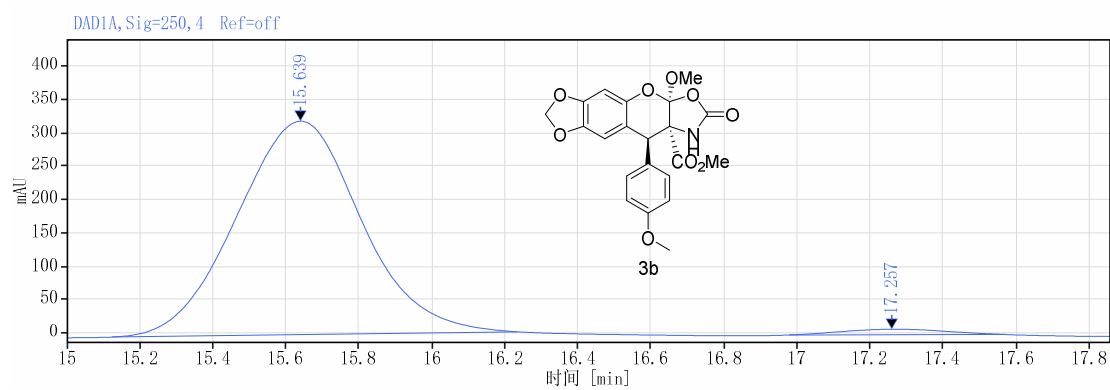

| RetTime [min] | Type | Wide [min] | Area[mAu*s] | Height[mAu] | Area% |
|---------------|------|------------|-------------|-------------|-------|
| 15.639        | MM   | 0.37       | 7575.32     | 320.00      | 97.89 |
| 17.257        | MM   | 0.30       | 163.43      | 8.22        | 2.11  |
| Total         |      |            | 7738.75     |             |       |

# SUPPORTING INFORMATION

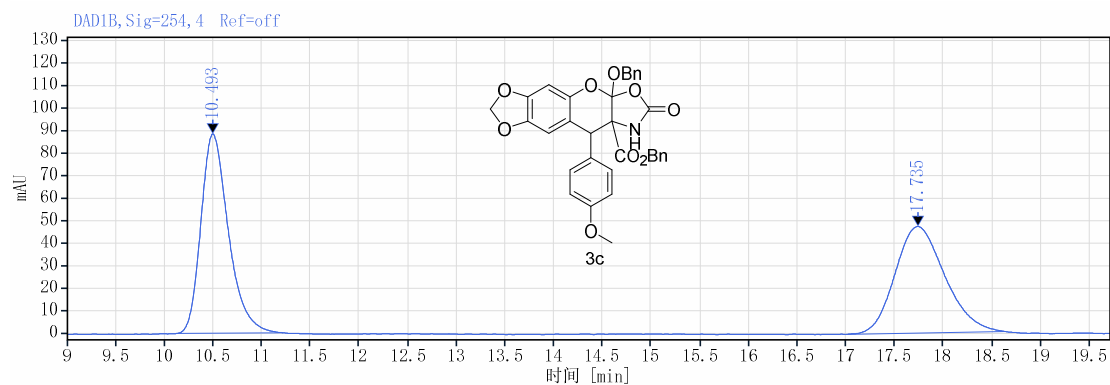

| RetTime [min] | Type | Wide [min] | Area[mAu*s] | Height[mAu] | Area% |
|---------------|------|------------|-------------|-------------|-------|
| 10.493        | MM   | 0.30       | 1739.07     | 88.60       | 50.97 |
| 17.735        | MM   | 0.49       | 1673.21     | 47.31       | 49.03 |
| Total         |      |            | 3412.29     |             |       |

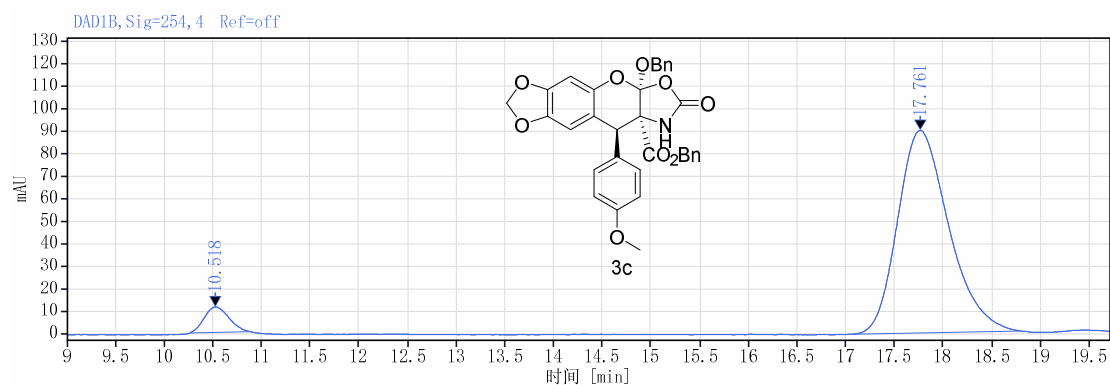

| RetTime [min] | Type | Wide [min] | Area[mAu*s] | Height[mAu] | Area% |
|---------------|------|------------|-------------|-------------|-------|
| 10.518        | MM   | 0.28       | 197.19      | 11.30       | 5.68  |
| 17.761        | MM   | 0.55       | 3272.68     | 89.97       | 94.32 |
| Total         |      |            | 3469.87     |             |       |

# SUPPORTING INFORMATION

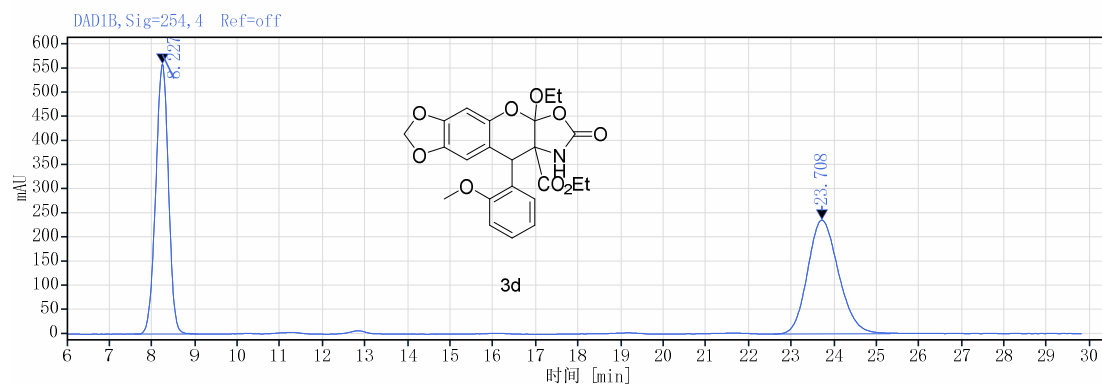

| RetTime [min] | Type | Wide [min] | Area[mAu*s] | Height[mAu] | Area% |
|---------------|------|------------|-------------|-------------|-------|
| 8.227         | VV   | 1.49       | 11670.59    | 559.44      | 49.51 |
| 23.708        | BV   | 2.74       | 11899.39    | 236.09      | 50.49 |
| Total         |      |            | 23569.98    |             |       |

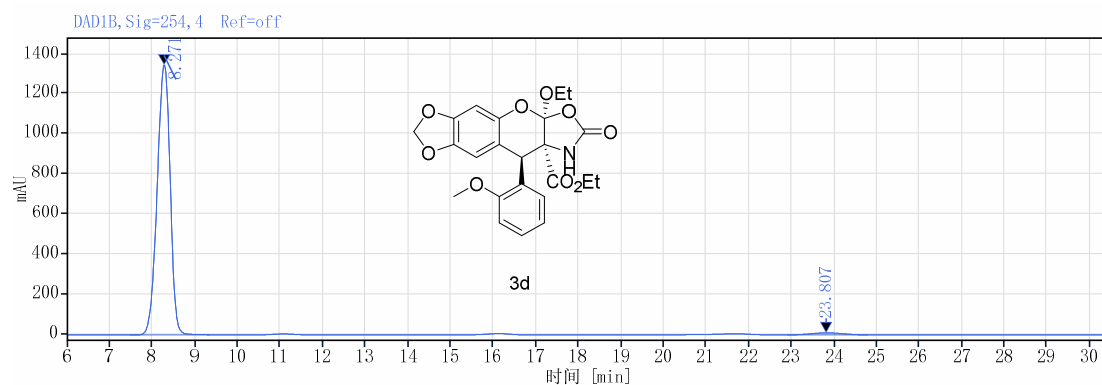

| RetTime [min] | Type | Wide [min] | Area[mAu*s] | Height[mAu] | Area% |
|---------------|------|------------|-------------|-------------|-------|
| 8.271         | VV   | 1.83       | 28563.15    | 1345.50     | 98.22 |
| 23.807        | BV   | 1.89       | 516.46      | 10.37       | 1.78  |
| Total         |      |            | 29079.61    |             |       |



# SUPPORTING INFORMATION

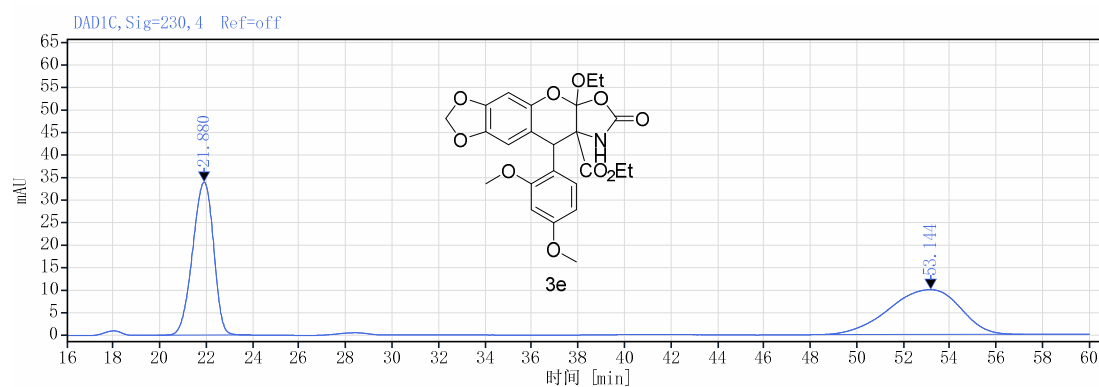

| RetTime [min] | Type | Wide [min] | Area[mAu*s] | Height[mAu] | Area% |
|---------------|------|------------|-------------|-------------|-------|
| 21.880        | BM m | 0.99       | 2125.96     | 33.97       | 50.15 |
| 53.144        | BB   | 8.62       | 2113.01     | 9.95        | 49.85 |
| Total         |      |            | 4238.97     |             |       |

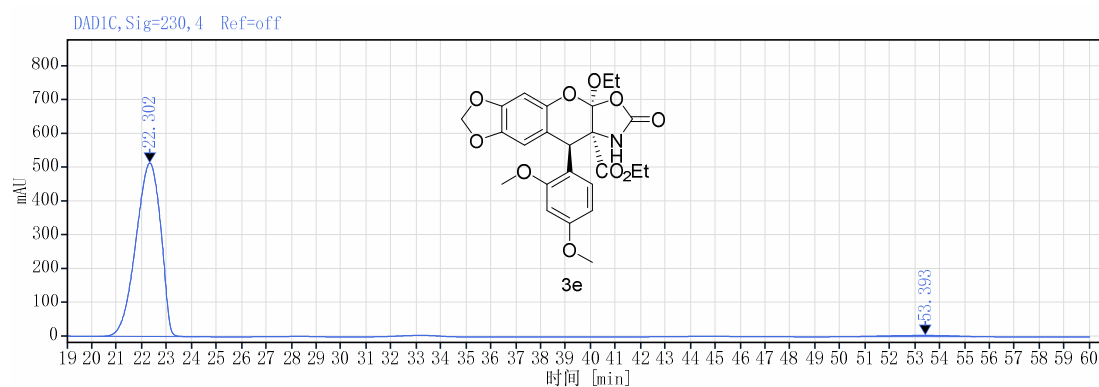

| RetTime [min] | Type | Wide [min] | Area[mAu*s] | Height[mAu] | Area% |
|---------------|------|------------|-------------|-------------|-------|
| 22.302        | BB   | 4.04       | 35442.66    | 513.81      | 98.49 |
| 53.393        | MM m | 1.98       | 543.88      | 3.24        | 1.51  |
| Total         |      |            | 35986.54    |             |       |

# SUPPORTING INFORMATION

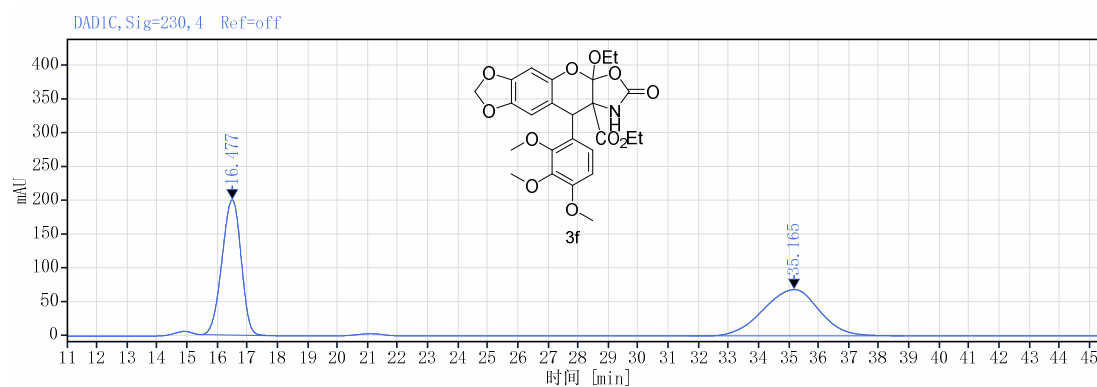

| RetTime [min] | Type | Wide [min] | Area[mAu*s] | Height[mAu] | Area% |
|---------------|------|------------|-------------|-------------|-------|
| 16.477        | MM m | 0.70       | 8825.25     | 200.52      | 49.82 |
| 35.165        | BM m | 2.04       | 8887.92     | 68.56       | 50.18 |
| Total         |      |            | 17713.17    |             |       |

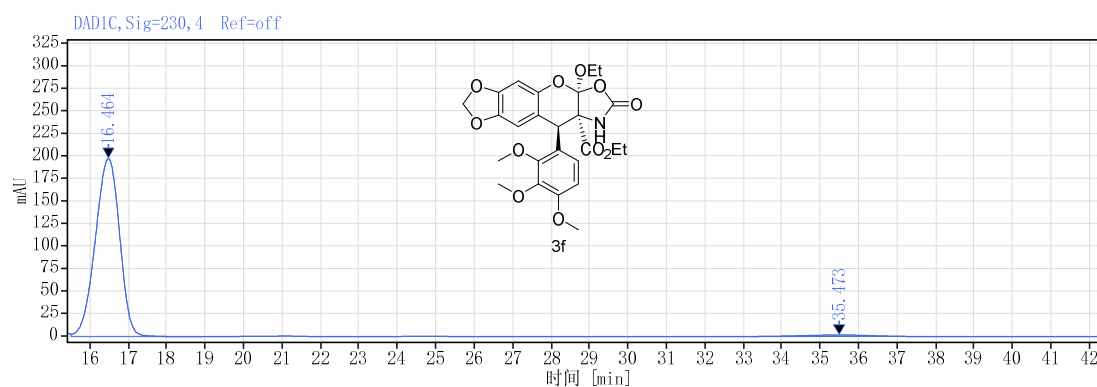

| RetTime [min] | Type | Wide [min] | Area[mAu*s] | Height[mAu] | Area% |
|---------------|------|------------|-------------|-------------|-------|
| 16.464        | VB   | 3.41       | 8679.48     | 197.94      | 97.82 |
| 35.473        | MM m | 1.43       | 193.33      | 1.59        | 2.18  |
| Total         |      |            | 8872.81     |             |       |

# SUPPORTING INFORMATION

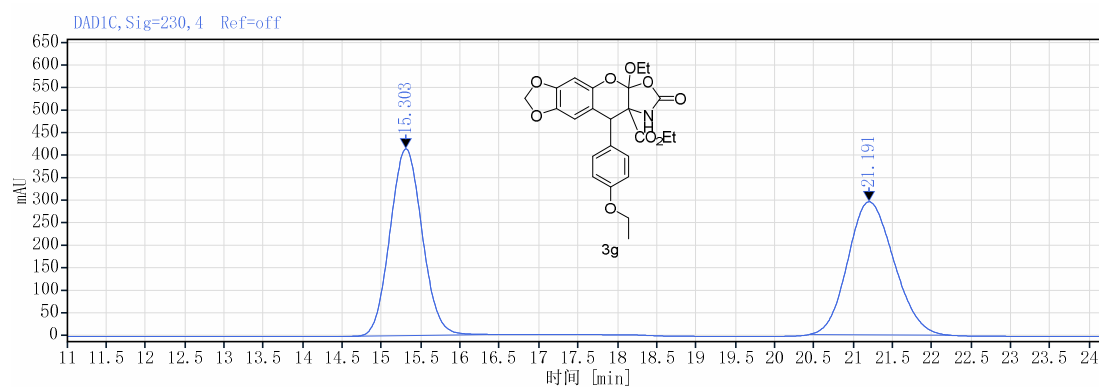

| RetTime [min] | Type | Wide [min] | Area[mAu*s] | Height[mAu] | Area% |
|---------------|------|------------|-------------|-------------|-------|
| 15.303        | MM m | 0.45       | 11735.12    | 414.64      | 49.38 |
| 21.191        | MM m | 0.64       | 12030.95    | 295.65      | 50.62 |
| Total         |      |            | 23766.07    |             |       |

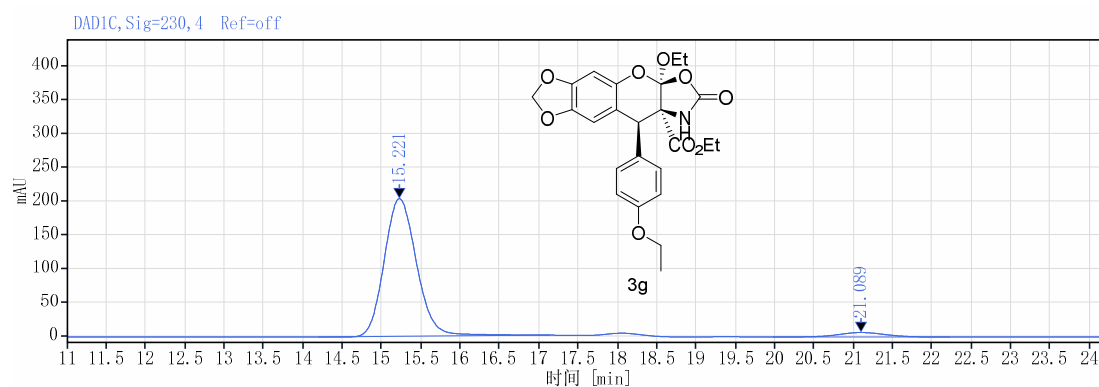

| RetTime [min] | Type | Wide [min] | Area[mAu*s] | Height[mAu] | Area% |
|---------------|------|------------|-------------|-------------|-------|
| 15.221        | BM m | 0.45       | 5829.52     | 203.94      | 95.51 |
| 21.089        | MM m | 0.65       | 274.12      | 6.59        | 4.49  |
| Total         |      |            | 6103.64     |             |       |

# SUPPORTING INFORMATION

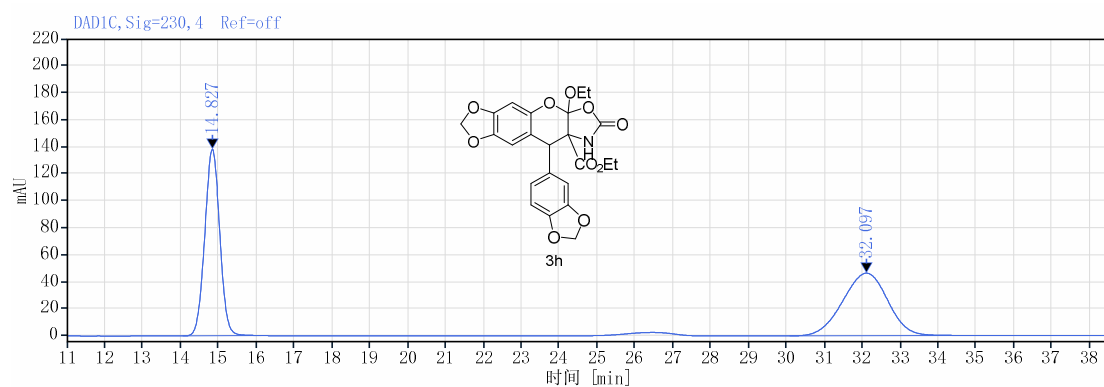

| RetTime [min] | Type | Wide [min] | Area[mAu*s] | Height[mAu] | Area% |
|---------------|------|------------|-------------|-------------|-------|
| 14.827        | BM   | 0.43       | 3805.65     | 138.24      | 49.98 |
| 32.097        | MM m | 1.30       | 3808.44     | 46.28       | 50.02 |
| Total         |      |            | 7614.08     |             |       |

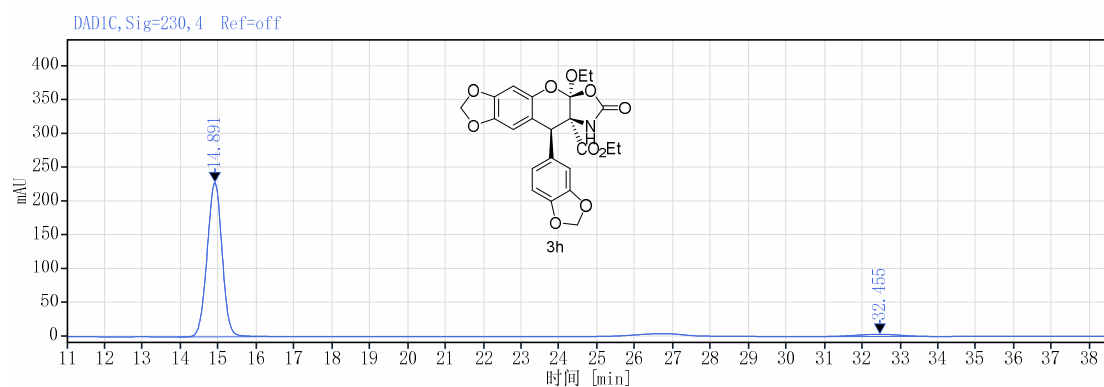

| RetTime [min] | Type | Wide [min] | Area[mAu*s] | Height[mAu] | Area% |
|---------------|------|------------|-------------|-------------|-------|
| 14.891        | MM m | 0.43       | 6242.00     | 228.04      | 96.06 |
| 32.455        | MM m | 1.11       | 255.99      | 3.27        | 3.94  |
| Total         |      |            | 6497.99     |             |       |

# SUPPORTING INFORMATION

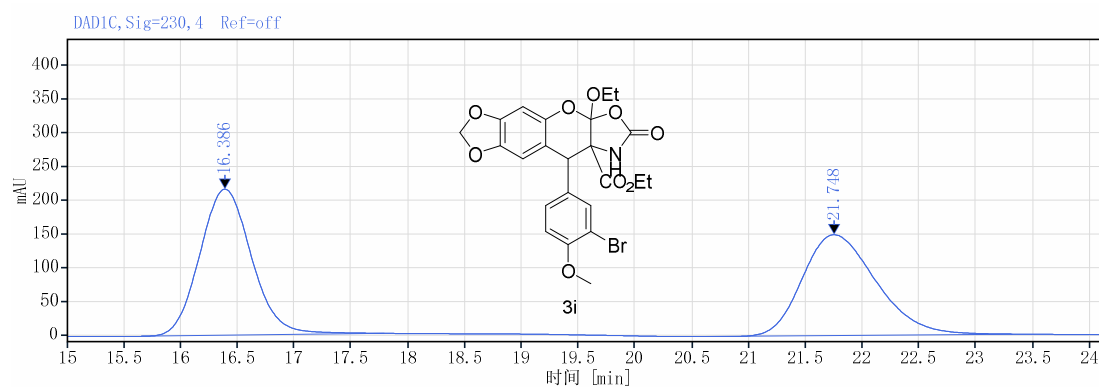

| RetTime [min] | Type | Wide [min] | Area[mAu*s] | Height[mAu] | Area% |
|---------------|------|------------|-------------|-------------|-------|
| 16.386        | MM m | 0.49       | 6854.81     | 216.44      | 50.47 |
| 21.478        | BM m | 0.70       | 6726.58     | 149.38      | 49.53 |
| Total         |      |            | 13581.38    |             |       |

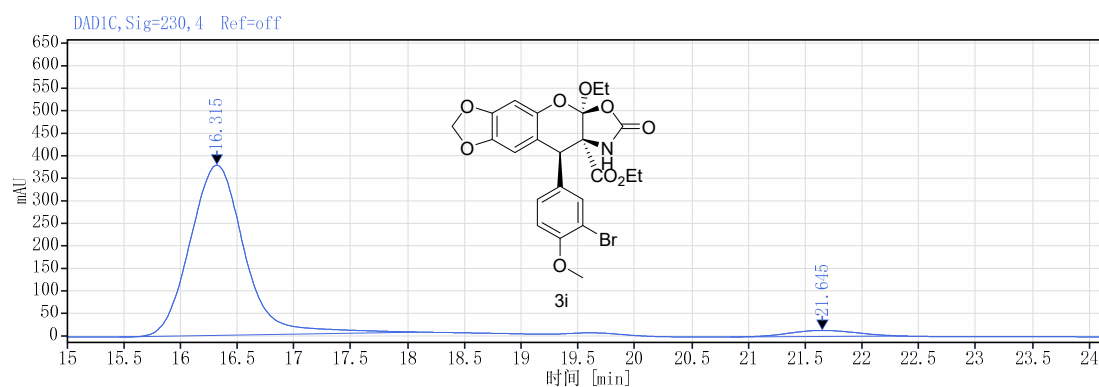

| RetTime [min] | Type | Wide [min] | Area[mAu*s] | Height[mAu] | Area% |
|---------------|------|------------|-------------|-------------|-------|
| 16.315        | MM m | 0.51       | 12543.02    | 378.13      | 95.69 |
| 21.645        | MM m | 0.66       | 564.81      | 13.59       | 4.31  |
| Total         |      |            | 13107.83    |             |       |

# SUPPORTING INFORMATION

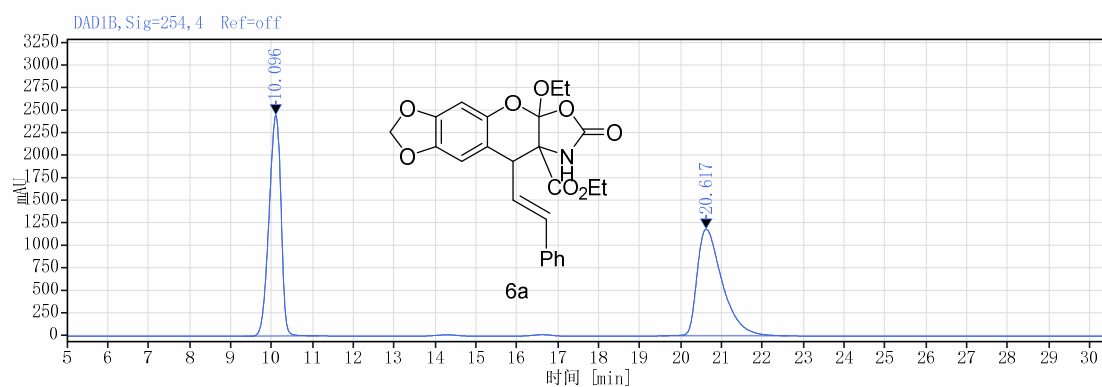

| RetTime [min] | Type | Wide [min] | Area[mAu*s] | Height[mAu] | Area% |
|---------------|------|------------|-------------|-------------|-------|
| 10.096        | BM m | 0.32       | 49555.51    | 2455.07     | 49.48 |
| 20.617        | MM m | 0.65       | 50596.08    | 1185.53     | 50.52 |
| Total         |      |            | 100151.58   |             |       |

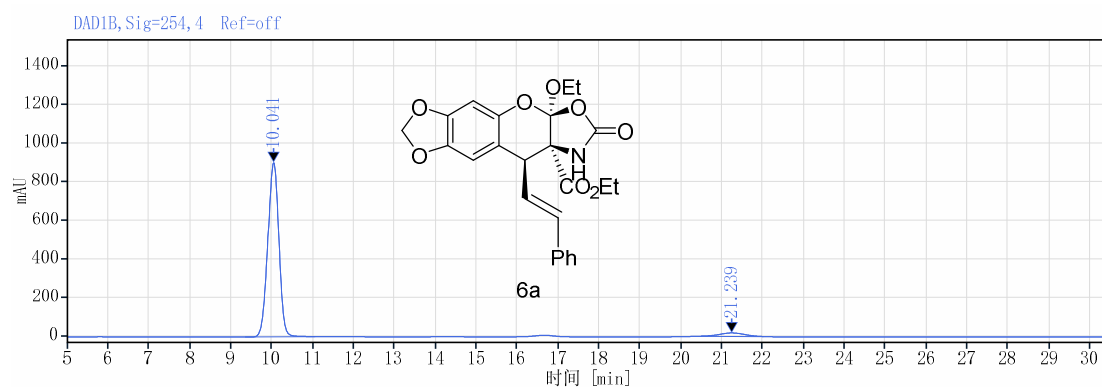

| RetTime [min] | Type | Wide [min] | Area[mAu*s] | Height[mAu] | Area% |
|---------------|------|------------|-------------|-------------|-------|
| 10.041        | BM m | 0.30       | 17055.99    | 903.20      | 95.75 |
| 21.239        | MM m | 0.65       | 756.19      | 17.99       | 4.25  |
| Total         |      |            | 17812.17    |             |       |

# SUPPORTING INFORMATION

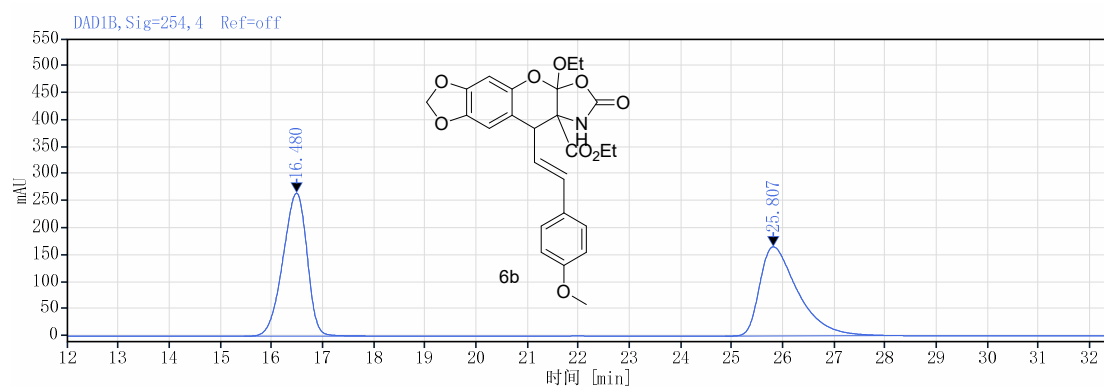

| RetTime [min] | Type | Wide [min] | Area[mAu*s] | Height[mAu] | Area% |
|---------------|------|------------|-------------|-------------|-------|
| 16.480        | BM m | 0.51       | 8640.15     | 264.61      | 50.22 |
| 25.807        | BM m | 0.78       | 8564.01     | 165.23      | 49.78 |
| Total         |      |            | 17204.16    |             |       |

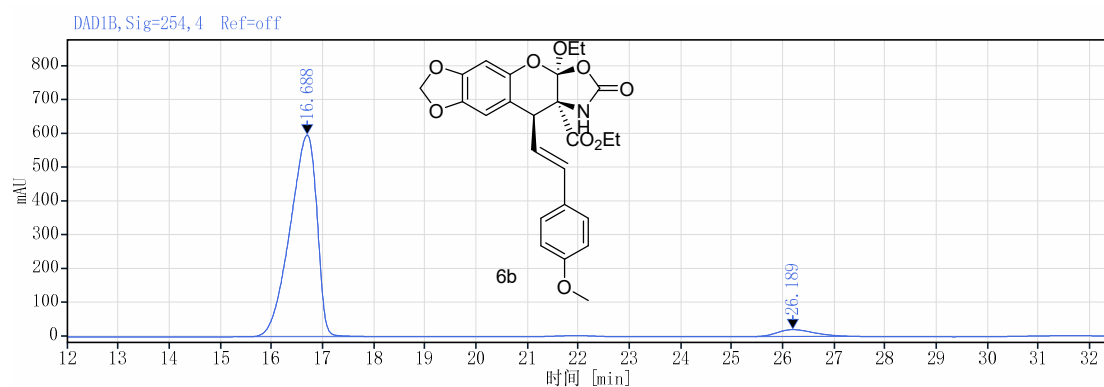

| RetTime [min] | Type | Wide [min] | Area[mAu*s] | Height[mAu] | Area% |
|---------------|------|------------|-------------|-------------|-------|
| 16.688        | MM m | 0.57       | 21734.81    | 597.26      | 95.61 |
| 26.189        | MM m | 0.76       | 996.80      | 20.22       | 4.39  |
| Total         |      |            | 22731.61    |             |       |

# SUPPORTING INFORMATION

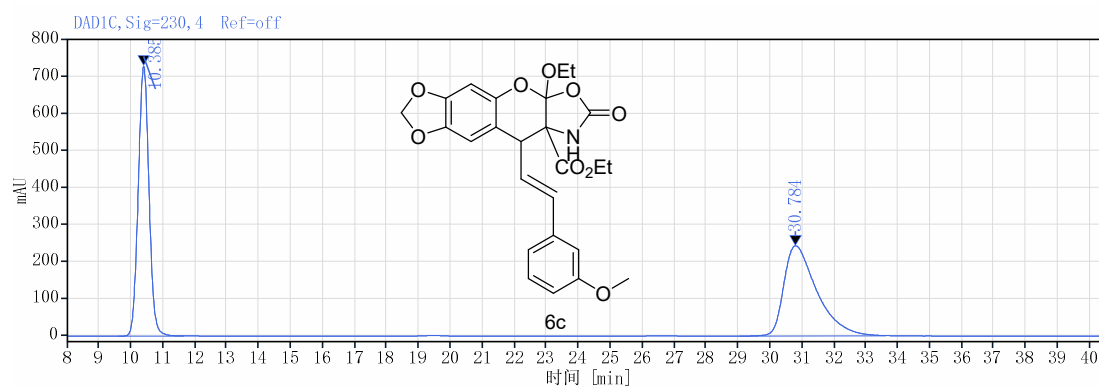

| RetTime [min] | Type | Wide [min] | Area[mAu*s] | Height[mAu] | Area% |
|---------------|------|------------|-------------|-------------|-------|
| 10.385        | BV   | 2.04       | 17108.17    | 731.14      | 49.26 |
| 30.784        | VV   | 4.57       | 17626.89    | 244.60      | 50.74 |
| Total         |      |            | 34735.06    |             |       |

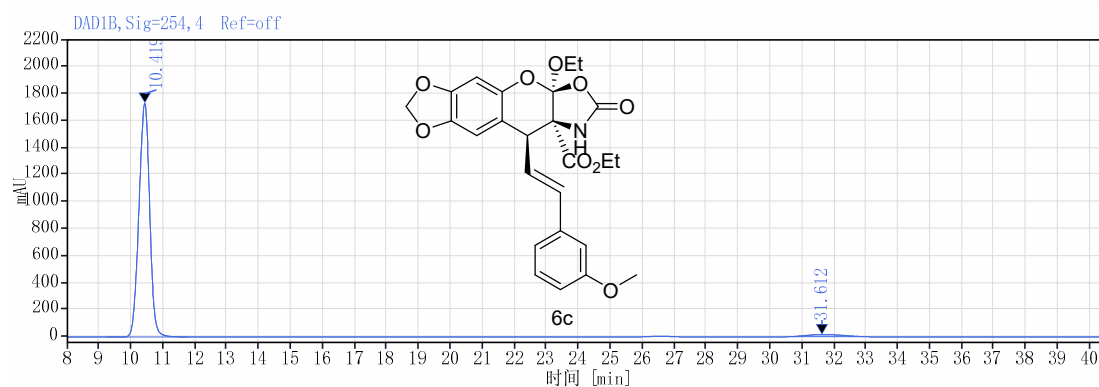

| RetTime [min] | Type | Wide [min] | Area[mAu*s] | Height[mAu] | Area% |
|---------------|------|------------|-------------|-------------|-------|
| 10.419        | MB m | 0.37       | 40396.71    | 1730.12     | 97.51 |
| 31.612        | MM m | 0.89       | 1033.49     | 14.00       | 2.49  |
| Total         |      |            | 41430.20    |             |       |



# SUPPORTING INFORMATION

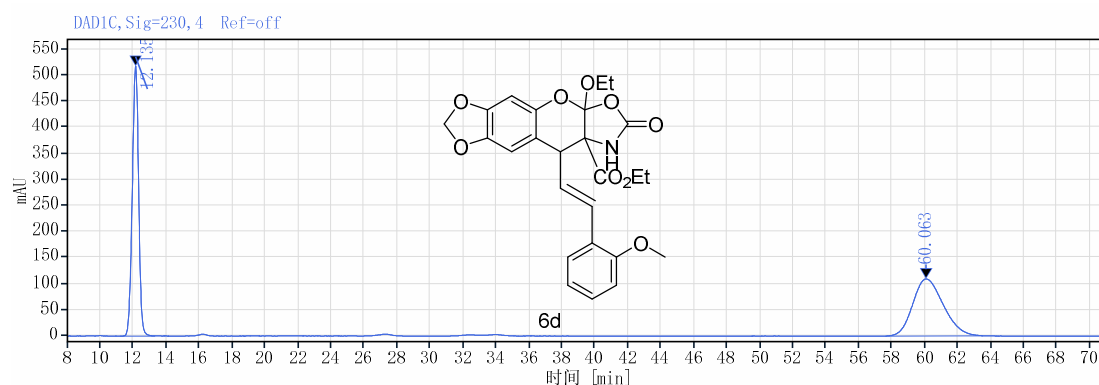

| RetTime [min] | Type | Wide [min] | Area[mAu*s] | Height[mAu] | Area% |
|---------------|------|------------|-------------|-------------|-------|
| 12.135        | BV   | 2.12       | 13835.84    | 517.63      | 49.62 |
| 60.063        | VB   | 5.92       | 14046.48    | 109.38      | 50.38 |
| Total         |      |            | 27882.32    |             |       |

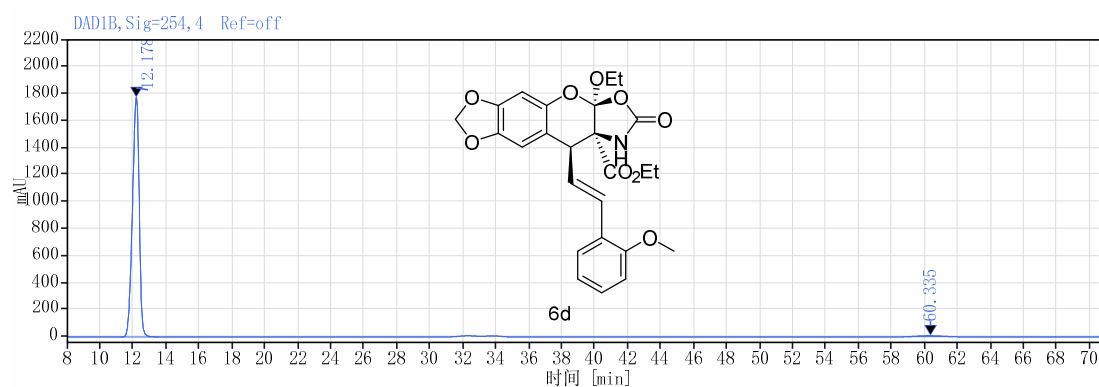

| RetTime [min] | Type | Wide [min] | Area[mAu*s] | Height[mAu] | Area% |
|---------------|------|------------|-------------|-------------|-------|
| 12.178        | BV   | 2.29       | 50639.03    | 1773.49     | 98.72 |
| 60.335        | MM m | 1.16       | 658.03      | 6.81        | 1.28  |
| Total         |      |            | 51297.06    |             |       |

# SUPPORTING INFORMATION

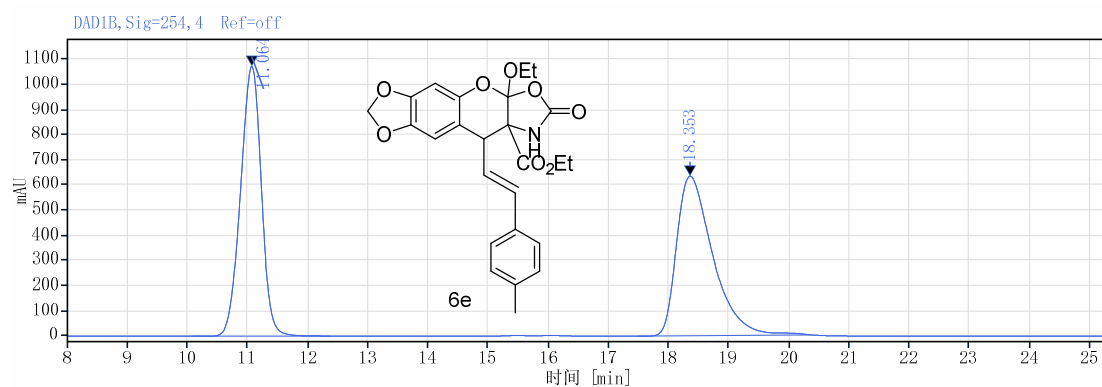

| RetTime [min] | Type | Wide [min] | Area[mAu*s] | Height[mAu] | Area% |
|---------------|------|------------|-------------|-------------|-------|
| 11.064        | BM m | 0.37       | 25672.83    | 1073.68     | 49.20 |
| 18.353        | BM m | 0.64       | 26510.19    | 635.43      | 50.80 |
| Total         |      |            | 52183.01    |             |       |

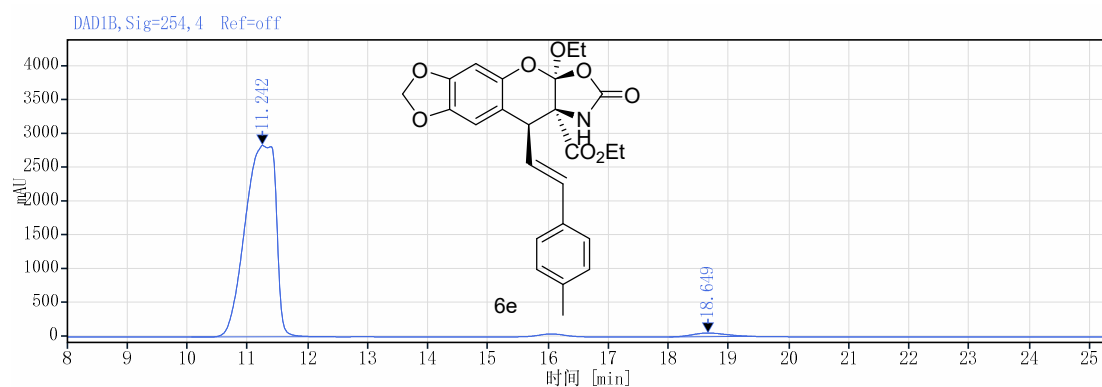

| RetTime [min] | Type | Wide [min] | Area[mAu*s] | Height[mAu] | Area% |
|---------------|------|------------|-------------|-------------|-------|
| 11.242        | MM m | 0.43       | 100954.77   | 2838.37     | 98.00 |
| 18.649        | MM m | 0.61       | 2060.22     | 53.38       | 2.00  |
| Total         |      |            | 17812.17    |             |       |

# SUPPORTING INFORMATION

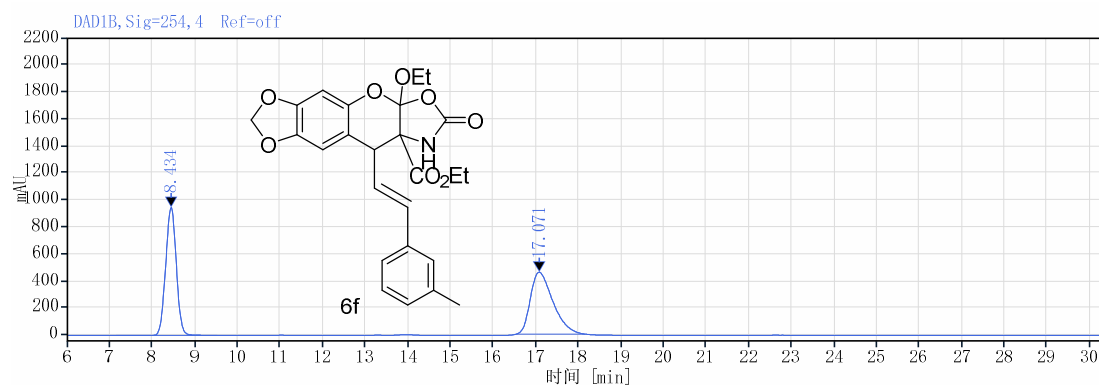

| RetTime [min] | Type | Wide [min] | Area[mAu*s] | Height[mAu] | Area% |
|---------------|------|------------|-------------|-------------|-------|
| 8.434         | MM m | 0.27       | 16256.61    | 947.09      | 49.23 |
| 17.071        | MM m | 0.57       | 16866.66    | 458.97      | 50.77 |
| Total         |      |            | 33223.27    |             |       |

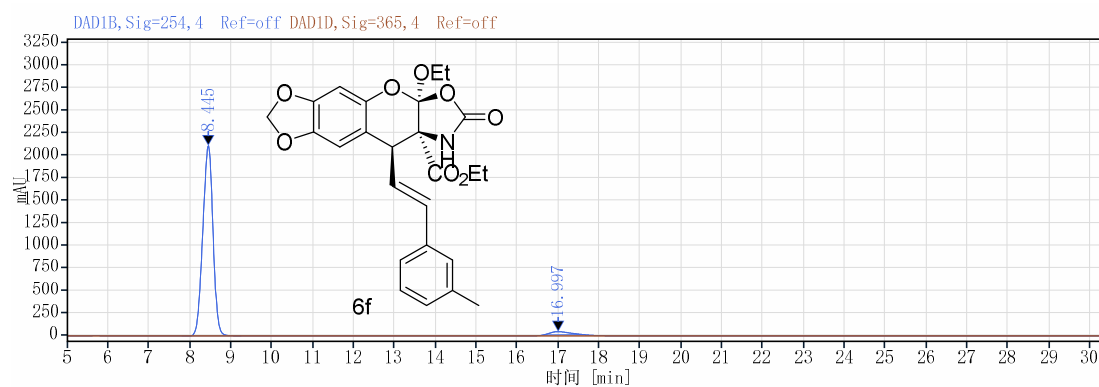

| RetTime [min] | Type | Wide [min] | Area[mAu*s] | Height[mAu] | Area% |
|---------------|------|------------|-------------|-------------|-------|
| 8.445         | MM m | 0.27       | 36853.62    | 2113.71     | 96.98 |
| 16.997        | MM m | 1.48       | 1146.30     | 36.12       | 3.02  |
| Total         |      |            | 37999.92    |             |       |

# SUPPORTING INFORMATION

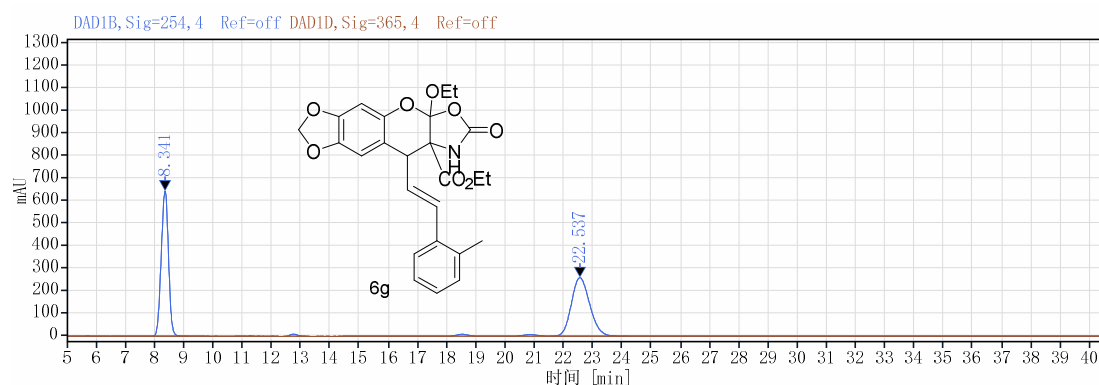

| RetTime [min] | Type | Wide [min] | Area[mAu*s] | Height[mAu] | Area% |
|---------------|------|------------|-------------|-------------|-------|
| 8.341         | VV   | 1.28       | 11103.81    | 645.63      | 49.46 |
| 22.537        | VV   | 2.70       | 11347.46    | 260.20      | 50.54 |
| Total         |      |            | 22451.27    |             |       |

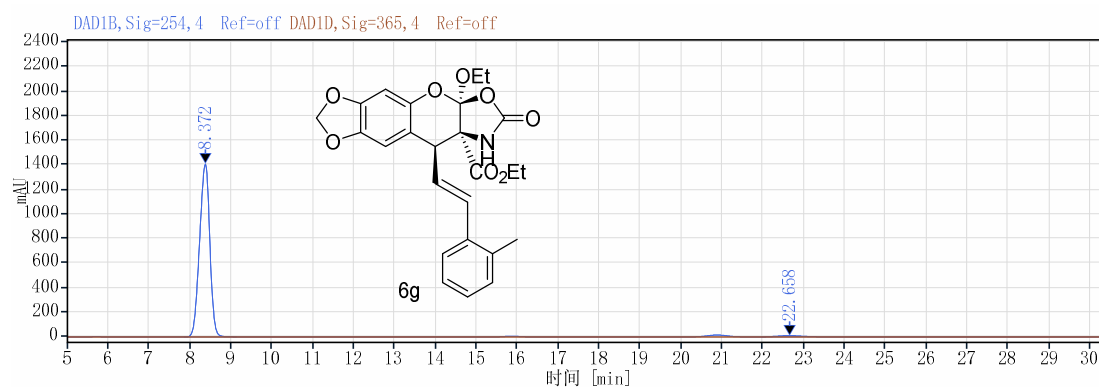

| RetTime [min] | Type | Wide [min] | Area[mAu*s] | Height[mAu] | Area% |
|---------------|------|------------|-------------|-------------|-------|
| 8.372         | BV   | 1.29       | 24515.35    | 1409.32     | 98.51 |
| 22.658        | MM m | 0.51       | 371.12      | 9.54        | 1.49  |
| Total         |      |            | 24886.47    |             |       |

# SUPPORTING INFORMATION

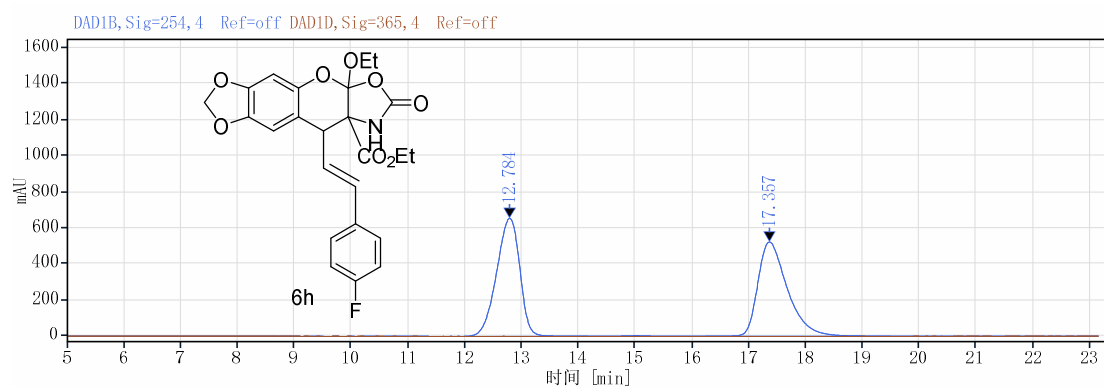

| RetTime [min] | Type | Wide [min] | Area[mAu*s] | Height[mAu] | Area% |
|---------------|------|------------|-------------|-------------|-------|
| 12.784        | VV   | 2.22       | 18595.73    | 655.75      | 49.53 |
| 17.357        | VV   | 3.27       | 18950.57    | 523.56      | 50.47 |
| Total         |      |            | 37546.30    |             |       |

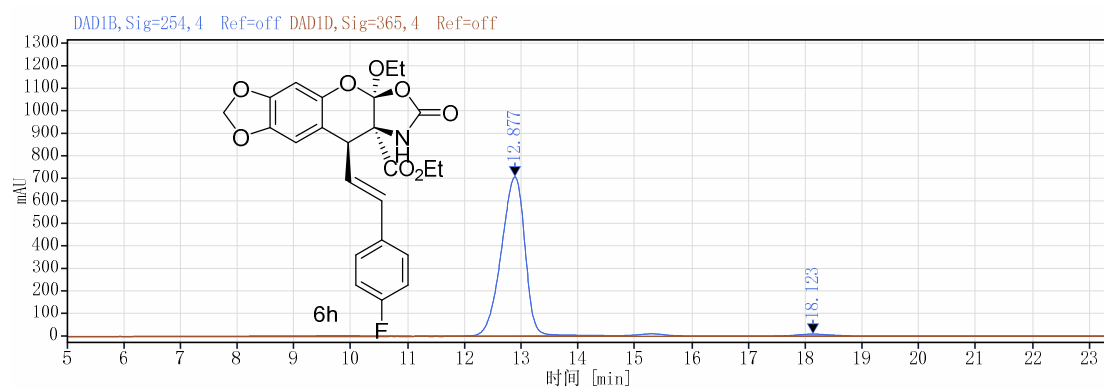

| RetTime [min] | Type | Wide [min] | Area[mAu*s] | Height[mAu] | Area% |
|---------------|------|------------|-------------|-------------|-------|
| 12.877        | BV   | 2.29       | 20341.26    | 706.93      | 98.62 |
| 18.123        | MM m | 0.51       | 284.83      | 7.91        | 1.38  |
| Total         |      |            | 17812.17    |             |       |

# SUPPORTING INFORMATION

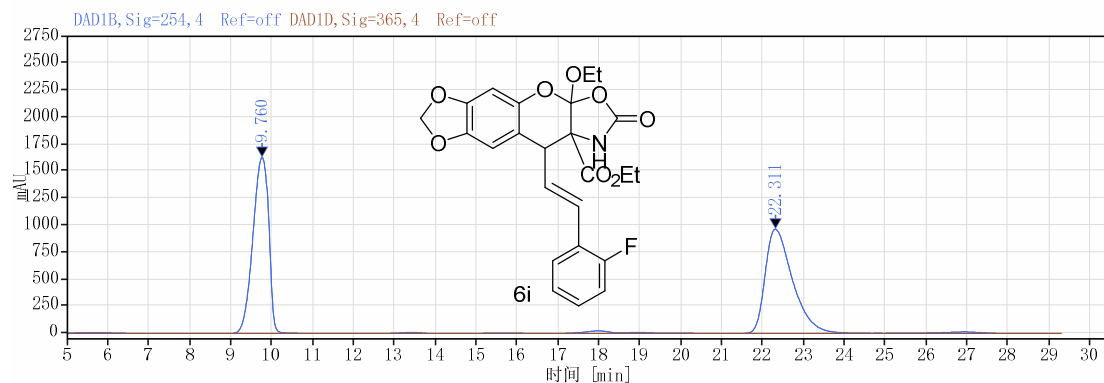

| RetTime [min] | Type | Wide [min] | Area[mAu*s] | Height[mAu] | Area% |
|---------------|------|------------|-------------|-------------|-------|
| 9.760         | BV   | 1.91       | 43665.65    | 1630.28     | 49.36 |
| 22.311        | BV   | 3.27       | 44790.70    | 964.75      | 50.64 |
| Total         |      |            | 88456.35    |             |       |

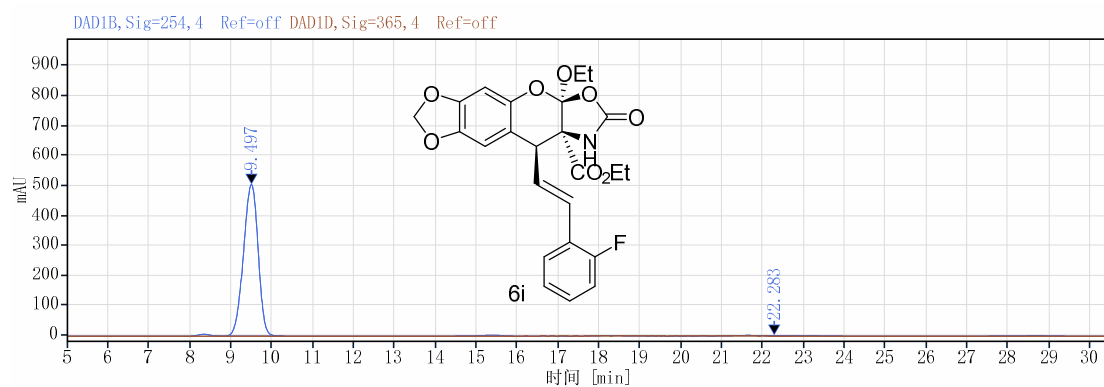

| RetTime [min] | Type | Wide [min] | Area[mAu*s] | Height[mAu] | Area% |
|---------------|------|------------|-------------|-------------|-------|
| 9.497         | MM m | 0.40       | 12553.33    | 504.69      | 99.67 |
| 22.283        | MM n | 0.47       | 42.10       | 1.10        | 0.33  |
| Total         |      |            | 12595.43    |             |       |

# SUPPORTING INFORMATION

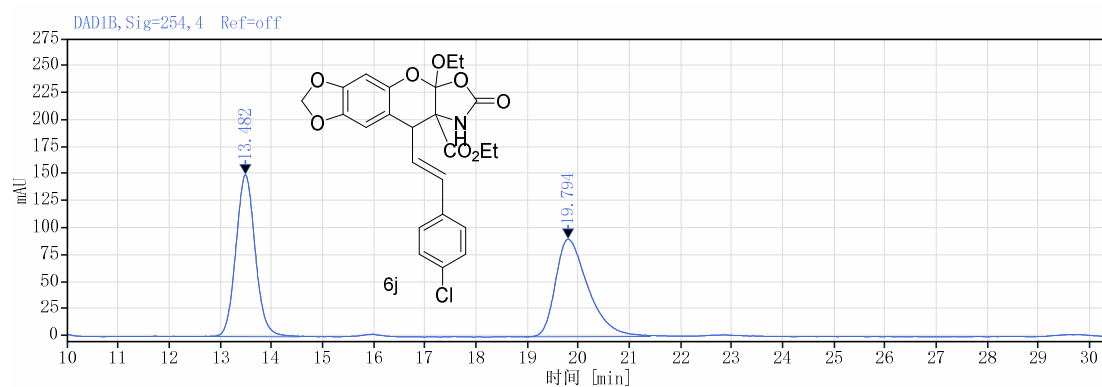

| RetTime [min] | Type | Wide [min] | Area[mAu*s] | Height[mAu] | Area% |
|---------------|------|------------|-------------|-------------|-------|
| 13.482        | VV   | 1.80       | 3944.25     | 149.84      | 49.66 |
| 19.794        | VV   | 2.46       | 3998.92     | 90.28       | 50.34 |
| Total         |      |            | 7943.17     |             |       |

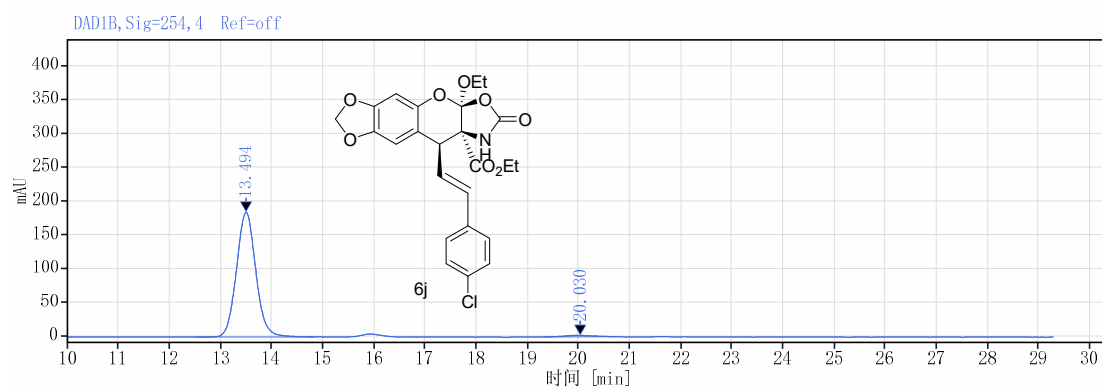

| RetTime [min] | Type | Wide [min] | Area[mAu*s] | Height[mAu] | Area% |
|---------------|------|------------|-------------|-------------|-------|
| 13.494        | MM m | 0.41       | 4836.43     | 184.62      | 98.16 |
| 20.030        | MM m | 0.48       | 90.72       | 3.37        | 1.84  |
| Total         |      |            | 4927.15     |             |       |

# SUPPORTING INFORMATION

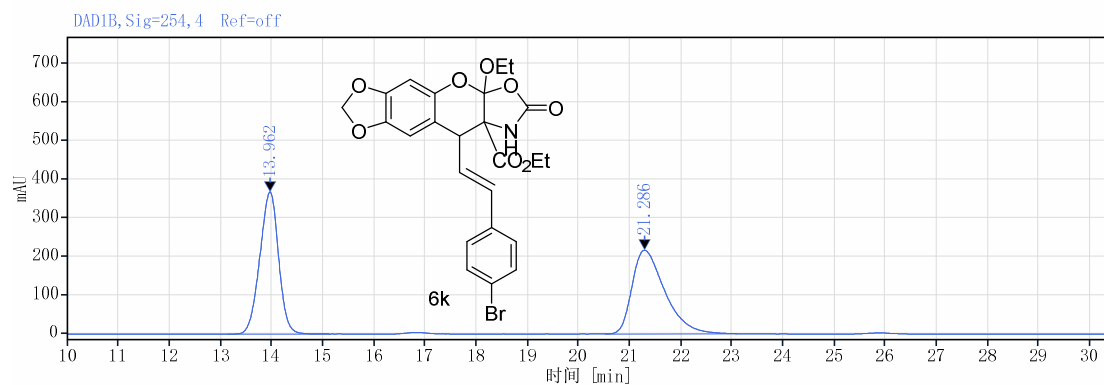

| RetTime [min] | Type | Wide [min] | Area[mAu*s] | Height[mAu] | Area% |
|---------------|------|------------|-------------|-------------|-------|
| 13.962        | VV   | 2.01       | 9411.03     | 368.43      | 49.21 |
| 21.286        | VV   | 2.58       | 9712.71     | 217.48      | 50.79 |
| Total         |      |            | 19123.74    |             |       |

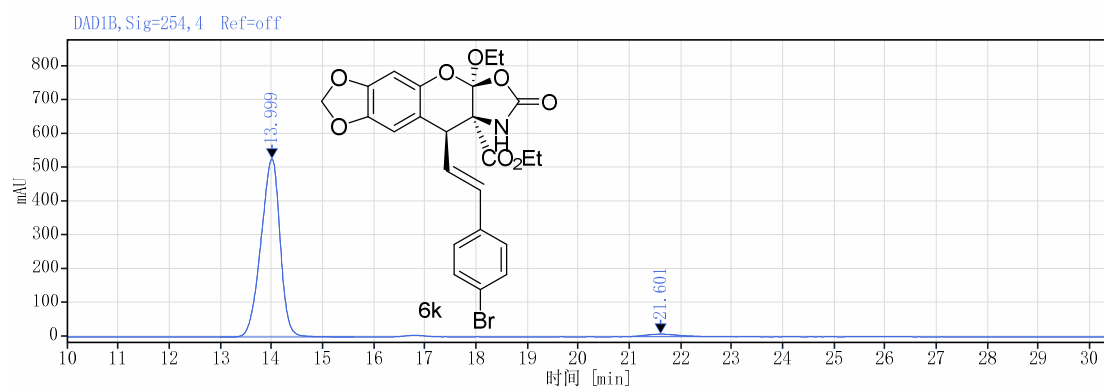

| RetTime [min] | Type | Wide [min] | Area[mAu*s] | Height[mAu] | Area% |
|---------------|------|------------|-------------|-------------|-------|
| 13.999        | VM m | 0.40       | 13693.97    | 527.47      | 97.88 |
| 21.601        | MM m | 0.57       | 296.79      | 7.04        | 2.12  |
| Total         |      |            | 13990.75    |             |       |



# SUPPORTING INFORMATION

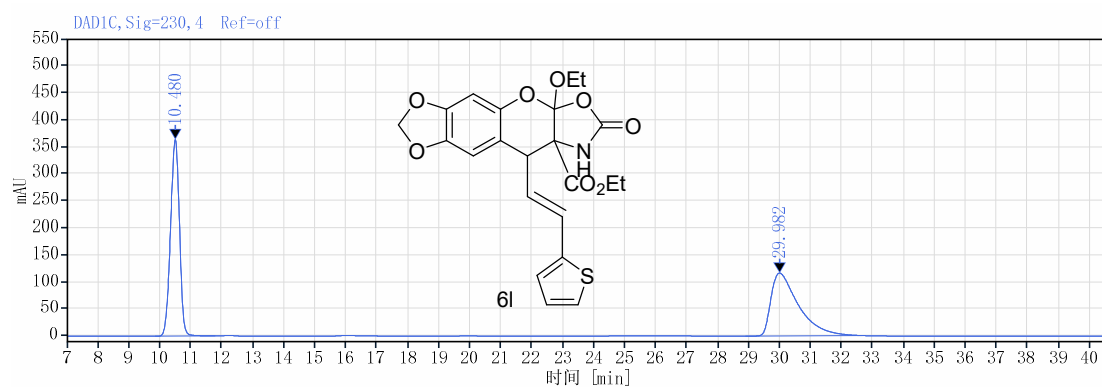

| RetTime [min] | Type | Wide [min] | Area[mAu*s] | Height[mAu] | Area% |
|---------------|------|------------|-------------|-------------|-------|
| 10.480        | BB   | 1.94       | 7308.38     | 364.13      | 50.44 |
| 29.982        | BM m | 0.92       | 7181.04     | 116.47      | 49.56 |
| Total         |      |            | 17812.17    |             |       |

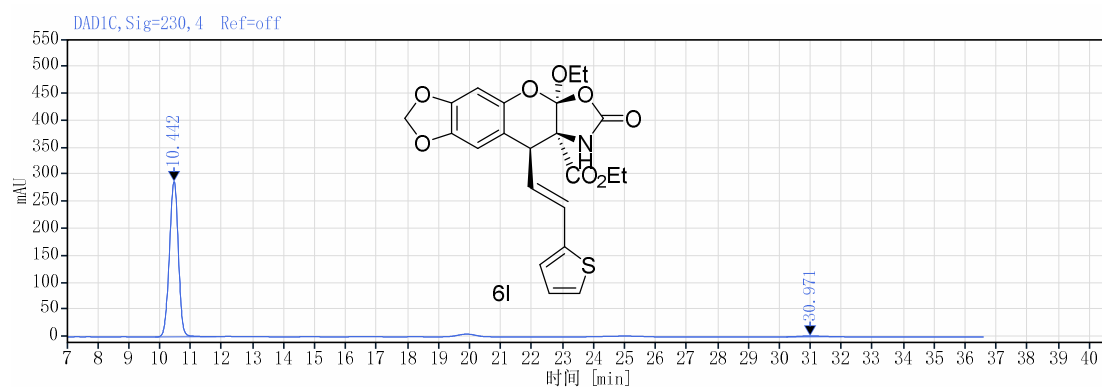

| RetTime [min] | Type | Wide [min] | Area[mAu*s] | Height[mAu] | Area% |
|---------------|------|------------|-------------|-------------|-------|
| 10.442        | BB   | 1.98       | 5769.87     | 287.29      | 98.59 |
| 30.971        | MM m | 0.74       | 82.71       | 1.49        | 1.41  |
| Total         |      |            | 5852.58     |             |       |

# SUPPORTING INFORMATION

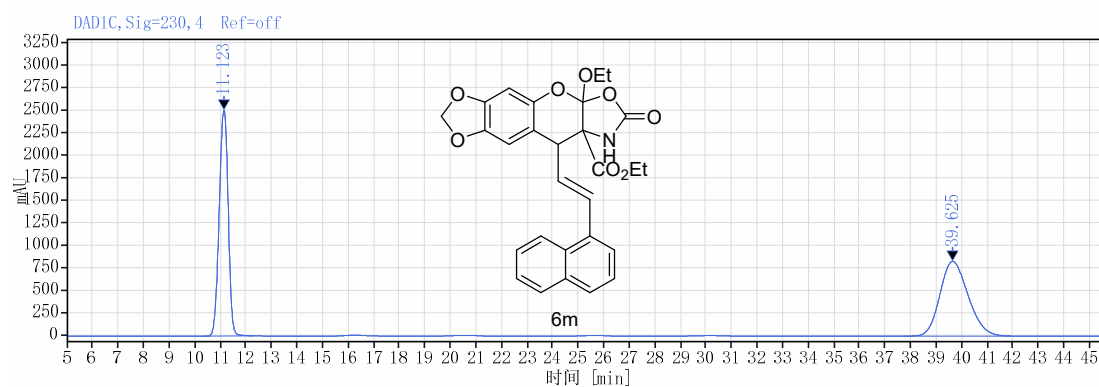

| RetTime [min] | Type | Wide [min] | Area[mAu*s] | Height[mAu] | Area% |
|---------------|------|------------|-------------|-------------|-------|
| 11.123        | BM m | 0.39       | 61475.64    | 2509.77     | 49.22 |
| 39.625        | MM m | 1.19       | 63434.90    | 830.28      | 50.78 |
| Total         |      |            | 124910.54   |             |       |

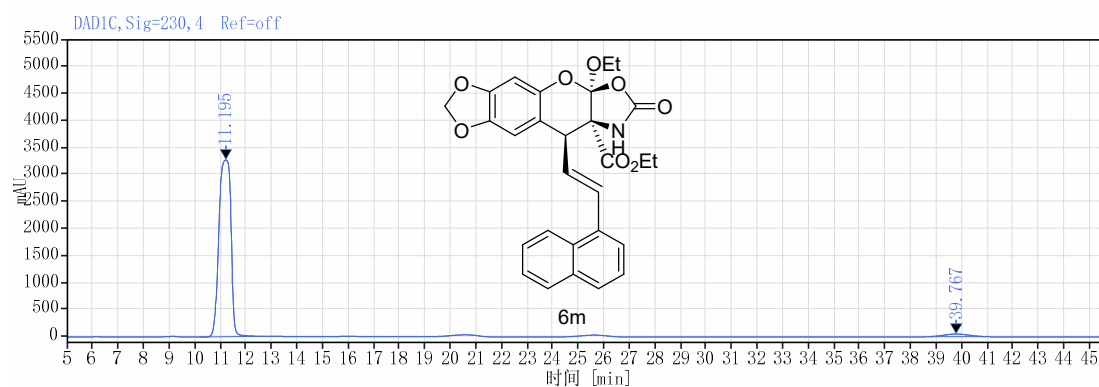

| RetTime [min] | Type | Wide [min] | Area[mAu*s] | Height[mAu] | Area% |
|---------------|------|------------|-------------|-------------|-------|
| 11.195        | MM m | 0.53       | 106298.30   | 3270.22     | 97.00 |
| 39.767        | MM m | 1.08       | 3291.92     | 48.89       | 3.00  |
| Total         |      |            | 109590.22   |             |       |

# SUPPORTING INFORMATION

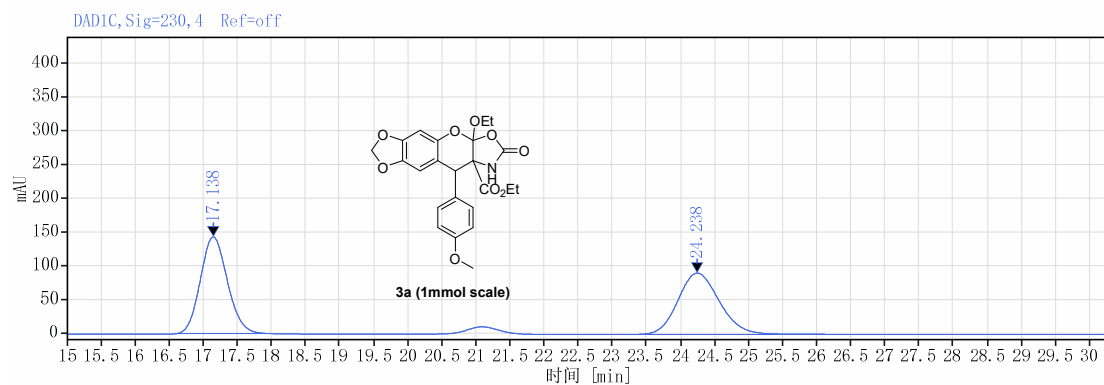

| RetTime [min] | Type | Wide [min] | Area[mAu*s] | Height[mAu] | Area% |
|---------------|------|------------|-------------|-------------|-------|
| 17.138        | MM m | 0.43       | 3935.53     | 142.98      | 50.70 |
| 24.238        | MM m | 0.66       | 3827.25     | 90.83       | 49.30 |
| Total         |      |            | 7762.78     |             |       |

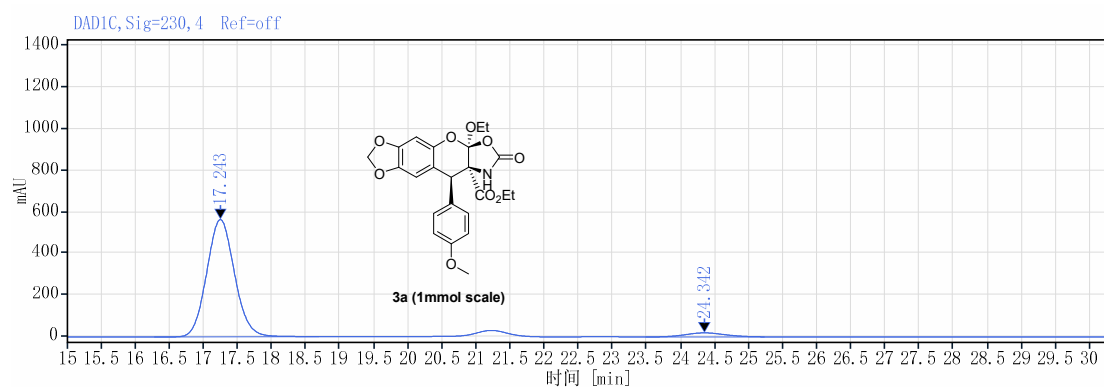

| RetTime [min] | Type | Wide [min] | Area[mAu*s] | Height[mAu] | Area% |
|---------------|------|------------|-------------|-------------|-------|
| 17.243        | MM m | 0.44       | 15983.59    | 564.33      | 95.35 |
| 24.342        | VM m | 0.63       | 778.66      | 19.34       | 4.65  |
| Total         |      |            | 16762.25    |             |       |

## 6. Crystallographic Data

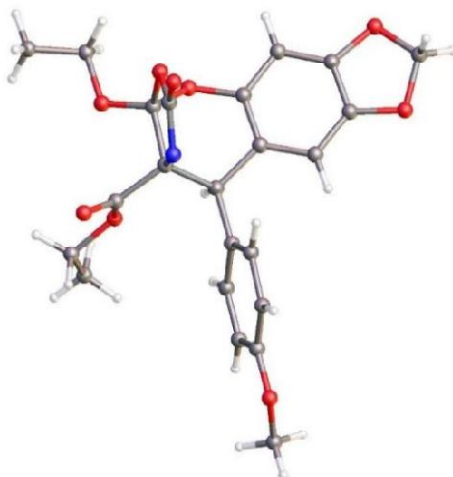The X-ray Single-Crystal Diffraction Analysis of **3a** (CCDC 2203106)

The configuration of the crystal **3a** was first recrystallized and confirmed by chiral HPLC analysis before X-ray crystallography analysis, and the configuration of the crystal is the same compared with the of **3a** (99% ee).

The crystals of **3a** were obtained from a solution of ethyl acetate and petroleum ether upon slow volatilization. The structure of **3a** ( $C_{23}H_{23}NO_9$ ) was determined by X-ray diffraction. The X-ray intensity data were measured at 168.0 K, on a Bruker APEX-II CCD diffractometer with helios mx multilayer monochromator Cu K $\alpha$  radiation ( $\lambda = 1.54178 \text{ \AA}$ ). The X-ray data have been deposited at the Cambridge Crystallographic Data Center (CCDC 2203106). The level set for thermal ellipsoids of all atoms is 50%.

**Table 1 Crystal data and structure refinement for 3a.**

|                                  |                                      |
|----------------------------------|--------------------------------------|
| Empirical formula                | $C_{23}H_{23}NO_9$                   |
| Formula weight                   | 457.13                               |
| Temperature/K                    | 180.0                                |
| Crystal system                   | monoclinic                           |
| Space group                      | $P2_1$                               |
| $a/\text{\AA}$                   | 14.647(3)                            |
| $b/\text{\AA}$                   | 15.996(3)                            |
| $c/\text{\AA}$                   | 21.798(4)                            |
| $\alpha/^\circ$                  | 90                                   |
| $\beta/^\circ$                   | 105.457(9)                           |
| $\gamma/^\circ$                  | 90                                   |
| Volume/ $\text{\AA}^3$           | 4922.4(15)                           |
| Z                                | 8                                    |
| $\rho_{\text{calc}}/\text{cm}^3$ | 1.353                                |
| $\mu/\text{mm}^{-1}$             | 0.890                                |
| F(000)                           | 2112.0                               |
| Crystal size/ $\text{mm}^3$      | $0.31 \times 0.15 \times 0.14$       |
| Radiation                        | CuK $\alpha$ ( $\lambda = 1.54178$ ) |

## SUPPORTING INFORMATION

---

|                                                  |                                                                    |
|--------------------------------------------------|--------------------------------------------------------------------|
| 2 $\theta$ range for data collection/ $^{\circ}$ | 4.206 to 146.848                                                   |
| Index ranges                                     | $-17 \leq h \leq 17$ , $-19 \leq k \leq 17$ , $-26 \leq l \leq 25$ |
| Reflections collected                            | 56578                                                              |
| Independent reflections                          | 17882 [ $R_{\text{int}} = 0.0649$ , $R_{\text{sigma}} = 0.0559$ ]  |
| Data/restraints/parameters                       | 17882/1/1313                                                       |
| Goodness-of-fit on $F^2$                         | 1.049                                                              |
| Final R indexes [ $I \geq 2\sigma(I)$ ]          | $R_1 = 0.0417$ , $wR_2 = 0.1051$                                   |
| Final R indexes [all data]                       | $R_1 = 0.0458$ , $wR_2 = 0.1084$                                   |
| Largest diff. peak/hole / $e \text{ \AA}^{-3}$   | 0.38/-0.28                                                         |
| Flack parameter                                  | 0.03(5)                                                            |

These data can be obtained free of charge from The Cambridge Crystallographic Data Centre via [www.ccdc.cam.ac.uk/data\\_request/cif](http://www.ccdc.cam.ac.uk/data_request/cif).
